# Supplementary material for: A stereoselective synthesis of the C9–C19 subunit of (+)-peloruside A
Source: Royal Society of Chemistry journal article supplement (doi:10.1039/c3ob27508f), 2013-01-01

## **Supporting Information**

### **A Stereocontrolled Synthesis of the C9-C19 Subunit of (+)-Peloruside A**

**Sadagopan Raghavan,\* V. Vinoth Kumar**

**Division of Natural Product Chemistry, Indian Institute of Chemical Technology,  
Hyderabad 500007, India**

### **Table of Contents**

|                                                       |        |
|-------------------------------------------------------|--------|
| General Information-----                              | S2     |
| Experimental section-----                             | S3-S8  |
| <sup>1</sup> H, <sup>13</sup> C and HPLC spectra----- | S9-S86 |

## General Information

All materials were used as received from a commercial supplier without further purification. All anhydrous reactions were performed using oven-dried or flame dried glassware, which was then cooled under nitrogen gas. Tetrahydrofuran (THF), toluene was distilled over Na/Ph<sub>2</sub>CO under nitrogen atmosphere. Dichloromethane (CH<sub>2</sub>Cl<sub>2</sub>), hexane, acetonitrile, dimethylsulfoxide, dimethylformamide, triethylamine (TEA), 2,6-lutidine and diethyl ether (Et<sub>2</sub>O) were dried over CaH<sub>2</sub> and distilled prior to use. 4 Å Molecular sieves were flame dried and then cooled under high vacuum prior to use. All reactions were monitored by E. Merck analytical thin layer chromatography (TLC) plates and analyzed with 254 nm UV light and/or anisaldehyde–sulfuric acid or potassium permanganate or PMA treatment. Silica gel for column chromatography was purchased from Acme (Silica Gel 60-120, 100-200 mesh). All <sup>1</sup>H and <sup>13</sup>C NMR spectra were recorded in CDCl<sub>3</sub> using Gemini 200, Avance 300, Inova 400, Inova 500 spectrometers. Chemical shifts (δ) are reported in parts per million (ppm) relative to residual CHCl<sub>3</sub> as an internal reference (<sup>1</sup>H: δ 7.26 ppm, <sup>13</sup>C: δ 77.00 ppm). Coupling constants (*J*) are reported in Hertz (Hz). Peak multiplicity is indicated as follows: s (singlet), d (doublet), t (triplet), q (quartet) and m (multiplet). Enantiomeric excess were recorded using Waters HPLC instrument. For the preparation of dienol silyl ketene acetal an inert atmosphere filtration setup was employed. Sealed tube was purchased from Aldrich Company. Mass spectra were recorded using Waters Mass spectrometer. HPLC spectra were recorded

using Waters 2998 spectrometer. High resolution mass (HRMS) were recorded using Applied Bio-Sciences HRMS spectrometer and Thermo LTQ-Orbitrap mass spectrometer. All IR-spectra were recorded using Nexus 870-FT-IR Thermo Nicolet spectrometer.

### Experimental section

**Compound 11.** To a suspension of NaH (4 g, 60% in Nujol, 100 mmol) in anhydrous THF (300 mL) cooled at 0 °C was added a solution of neopentyl glycol **10** (10.4 g, 100 mmol) in anhydrous THF (100 mL) dropwise over 30 minutes. The mixture was stirred for 16 h at rt during which a white color thick mono anion was formed. TBDPS-Cl (27.3 mL, 105 mmol) was added slowly at 0 °C over 20 minutes, the mixture stirred for an additional 3 h and quenched with aq NH<sub>4</sub>Cl solution at 0 °C. The layers were separated and the aqueous layer extracted with ethyl acetate (3×200 mL). The combined organic layers were washed with brine, dried over anhydrous Na<sub>2</sub>SO<sub>4</sub>, concentrated and purified by column chromatography using hexanes/EtOAc (9:1, v/v) to afford pure mono protected alcohol **11** (29 g, 85 mmol) in 85% yield as a viscous oil. TLC R<sub>f</sub> = 0.25 (15% EtOAc/Hexanes). IR (KBr): 3446, 3070, 2957, 2860, 1469, 1108, 821, 703, 506 cm<sup>-1</sup>. <sup>1</sup>H NMR (300 MHz, CDCl<sub>3</sub>): δ 7.69-7.40 (m, 4H), 7.46-7.38 (m, 6H), 3.51 (s, 2H), 3.47 (s, 2H), 1.06 (s, 9H), 0.89 (s, 6H). <sup>13</sup>C NMR (75 MHz, CDCl<sub>3</sub>): δ 135.6, 133.1, 129.7, 127.7, 71.9, 71.0, 37.0, 26.8, 21.4, 19.2. MS (ESI) 365 [M+Na]<sup>+</sup>. HRMS (ESI) *m/z* calcd for C<sub>21</sub>H<sub>30</sub>O<sub>2</sub>NaSi 365.1912; found 365.1921.

**Compound 9.** The mixture of mono protected alcohol **11** (6.8 g, 20 mmol) and IBX (6.2 g, 24 mmol) in ethyl acetate (60 mL) was heated at reflux for 6 h. The solid material was

filtered and washed with ethyl acetate (2×30 mL). The combined filtrates were concentrated and the residue purified by flash column chromatography using hexanes/EtOAc (9:1, v/v) to afford pure aldehyde **9** (6.5 g, 19 mmol) in 95% yield as a viscous oil. TLC  $R_f$  = 0.35 (15% EtOAc/Hexanes). IR (KBr): 2959, 2932, 2859, 1706, 1471, 1427, 1110, 822, 704, 505  $\text{cm}^{-1}$ .  $^1\text{H}$  NMR (300 MHz,  $\text{CDCl}_3$ ):  $\delta$  9.55 (s, 1H), 7.62-7.58 (m, 4H), 7.42-7.34 (m, 6H), 3.60 (s, 2H), 1.06 (s, 6H), 1.03 (s, 9H).  $^{13}\text{C}$  NMR (75 MHz,  $\text{CDCl}_3$ ):  $\delta$  205.6, 135.6, 133.0, 129.7, 127.7, 68.8, 48.3, 26.7, 19.2, 18.5. MS (ESI) 379  $[\text{K}]^+$ .

**Compound 8.** To a solution of  $i\text{Pr}_2\text{NH}$  (5.6 mL, 40.0 mmol) in anhydrous THF (40 mL) cooled at 0 °C was added  $n\text{-BuLi}$  (15.4 mL, 40.0 mmol, 2.6 M in hexane) over 5 minutes. The clear, colorless solution was stirred at 0 °C for 20 minutes and then cooled to -78 °C. Freshly distilled 2,2,6-trimethyl-[1,3]dioxine-4-one (4.7 mL, 36.0 mmol) was added neat over 10 minutes and the resulting yellowish solution was stirred at -78 °C for 60 minutes. Freshly distilled TMS-Cl (5.3 mL, 42 mmol) was added slowly over 10 min and the reaction mixture was stirred for an additional 30 minutes at -78 °C. The thick, orange suspension was allowed to warm to rt over 90 minutes and was then filtered over anhydrous  $\text{Na}_2\text{SO}_4$  under nitrogen atmosphere. The filter cake was rinsed twice with anhydrous hexane (2×15 mL) and the clear, orange filtrate was concentrated under reduced pressure at low temperature (30-35 °C). The remaining red oil was distilled under reduced pressure (0.4 mm/Hg, 60 °C) to yield **8** (29.3 g, 78% yield) as a colorless liquid. The silyl ether **8** was stored at 0 °C and used within a week.  $^1\text{H}$  NMR (300 MHz,  $\text{CDCl}_3$ ):  $\delta$  4.55 (s, 1H), 4.00 (s, 1H), 3.80 (s, 1H), 1.53 (s, 6H), 0.26 (s, 9H).

**Anti-1,3-acetonide of 15.** To a solution of diol **15** (45 mg, 0.1 mmol) in anhydrous dichloromethane (2 mL) was added 2,2-dimethoxypropane (0.1 mL) and catalytic amounts of CSA. The mixture was stirred at rt for 1 h. Few drops of Et<sub>3</sub>N, enough to neutralize CSA, were added and the volatiles removed under reduced pressure. The residue was purified by column chromatography using 10% hexanes/EtOAc (v/v) as the eluent to afford the corresponding acetonide (45 mg, 0.095 mmol) in 95% yield. TLC R<sub>f</sub> = 0.4 (20% EtOAc/Hexanes). IR (KBr): 2960, 2860, 1735, 1469, 1428, 1369, 1257, 1169, 1107, 822, 703, 505 cm<sup>-1</sup>. <sup>1</sup>H NMR (300 MHz, CDCl<sub>3</sub>): δ 7.73-7.64 (m, 4H), 7.48-7.37 (m, 6H), 4.21-4.15 (m, 1H), 3.87 (dd, *J* = 9.9, 5.9 Hz, 1H), 3.69 (s, 3H), 3.52 (d, *J* = 8.9 Hz, 1H), 3.33 (d, *J* = 8.9 Hz, 1H), 2.54 (dd, *J* = 15.9, 7.9 Hz, 1H), 2.43 (dd, *J* = 15.9, 4.9 Hz, 1H), 1.92-1.86 (m, 1H), 1.47-1.40 (m, 1H), 1.37 (s, 3H), 1.30 (s, 3H), 1.07 (s, 9H), 0.87 (s, 3H), 0.83 (s, 3H). <sup>13</sup>C NMR (75 MHz, CDCl<sub>3</sub>): δ 171.5, 135.7, 133.7, 129.5, 127.5, 100.5, 69.3, 69.0, 63.9, 51.6, 40.6, 38.7, 32.6, 26.9, 24.6, 24.1, 20.2, 19.4, 19.1. MS (ESI) 521 [M+Na]<sup>+</sup>. HRMS (ESI) *m/z* calcd for C<sub>29</sub>H<sub>42</sub>O<sub>5</sub>NaSi 521.26937; found 521.26853.

**Compound 23.** To a stirred suspension of LiAlH<sub>4</sub> (7.4 g, 200 mmol) in anhydrous THF (300 mL) cooled at -10 °C was added a solution of diethyl ethyl malonate **22** (18.8 g, 100 mmol) in THF (300 mL) dropwise over 30 minutes. The reaction mixture was stirred at rt for 16 h. The reaction mixture was cooled to -10 °C and an additional 200 mL of THF was added. The reaction was quenched with aq 20% NaOH solution followed by H<sub>2</sub>O. This mixture was further diluted with THF (300 mL), filtered through a pad of Celite and the precipitated aluminum salts were washed with THF repeatedly until all the diol was removed from the aluminum salt (It required 6 to 8 times of washing). The combined

filtrates were concentrated under reduced pressure to give an yellow oil which was distilled under reduced pressure at 110 °C, to provide diol **23** as a colorless liquid (6.8 g, 65 mmol) in 65% yield. <sup>1</sup>H NMR (500 MHz, CDCl<sub>3</sub>): δ 3.82-3.69 (m, 2H), 3.62-3.58 (m, 2H), 1.64-1.56 (m, 1H), 1.32-1.24 (m, 2H), 0.92 (t, *J* = 7.9 Hz, 3H).

**Compound 24.** To a suspension of NaH (2 g, 60% in Nujol, 50 mmol) in anhydrous THF (100 mL) cooled at 0 °C was added a solution of diol **23** (5.2 g, 50 mmol) in anhydrous THF (100 mL) dropwise over 30 minutes. Stirring was continued for 16 h at rt. TBS-Cl (9 g, 60 mmol) in anhydrous THF (30 mL) was added at 0 °C slowly. After 3 h of stirring at rt, the reaction was quenched with aq NH<sub>4</sub>Cl at 0 °C. The layers were separated and the aqueous layer was extracted with ethyl acetate (3×60 mL). The combined organic layers were washed with brine, dried over anhydrous Na<sub>2</sub>SO<sub>4</sub>, concentrated and the residue purified by column chromatography using hexanes/EtOAc (9:1, v/v) to afford alcohol **24** (7.7 g, 35 mmol) in 70% yield as a colorless oil. TLC R<sub>f</sub> = 0.15 (20% EtOAc/Hexanes). IR (KBr): 3421, 3210, 2894, 1983, 1739, 1643, 1526, 1120, 709 cm<sup>-1</sup>. <sup>1</sup>H NMR (500 MHz, CDCl<sub>3</sub>): δ 3.78 (dd, *J* = 9.8, 3.9 Hz, 1H), 3.69 (dd, *J* = 9.8, 3.0 Hz, 1H), 3.64-3.54 (m, 2H), 1.66-1.56 (m, 1H), 1.36-1.22 (m, 2H), 0.98-0.90 (m, 12H), 0.07 (s, 6H). <sup>13</sup>C NMR (75 MHz, CDCl<sub>3</sub>): δ 67.0, 66.2, 43.5, 25.7, 20.5, 18.1, 11.6, -3.7, -5.7. MS (ESI) 241 [M+Na]<sup>+</sup>. HRMS (ESI) *m/z* calcd for C<sub>11</sub>H<sub>26</sub>O<sub>2</sub>NaSi, 241.1599; found 241.1608.

**Compounds 25 and 26.** To a solution of racemic alcohol **24** (6.6 g, 30 mmol) and Amano lipase (0.50 g) in diisopropyl ether (90 mL) was added freshly distilled vinyl acetate (4 mL, 75 mmol). The heterogeneous mixture was stirred at rt for 12 h before being filtered through Celite to remove the enzyme. The filter cake was washed with Et<sub>2</sub>O (2×40 mL) and the combined filtrates were concentrated under reduced pressure. Purification of the

residue by column chromatography using hexanes/EtOAc (95:5, v/v) afforded initially (*R*)-acetate **26** (3.4 g, 13 mmol) in 43% yield as an oil and later (*S*)-alcohol **25** (2.7 gm, 12.3 mmol) in 41% yield as an oil. **Compound 26**. TLC  $R_f = 0.15$  (20% EtOAc/Hexanes).  $[\alpha]_D^{35} = +6.2$  (*c* 1, CHCl<sub>3</sub>). IR (KBr): 2890, 2856, 1798, 1734, 1640, 1529, 1109, 708 cm<sup>-1</sup>. <sup>1</sup>H NMR (300 MHz, CDCl<sub>3</sub>):  $\delta$  4.06 (d, *J* = 5.6 Hz, 2H), 3.60-3.54 (m, 2H), 2.04 (s, 3H), 1.78-1.64 (m, 1H), 1.42-1.24 (m, 2H), 0.98-0.88 (m, 12H), 0.03 (s, 6H). <sup>13</sup>C NMR (75 MHz, CDCl<sub>3</sub>):  $\delta$  171.2, 64.5, 62.3, 41.8, 25.8, 20.9, 20.7, 18.3, 11.4, -5.5. MS (ESI) 283 [M+Na]<sup>+</sup>. HRMS (ESI) *m/z* calcd for C<sub>13</sub>H<sub>28</sub>O<sub>3</sub>NaSi 283.1705; found 283.1712. **Compound 25**.  $[\alpha]_D^{35} = -3.9$  (*c* 1, CHCl<sub>3</sub>), all other physical characteristics were identical to compound **24**.

**Compound epi-25**. To a solution of acetate **26** (3.1 g, 12 mmol) in MeOH (24 mL) was added K<sub>2</sub>CO<sub>3</sub> (163 mg, 1.2 mmol). The reaction mixture was stirred for 2 h at rt. The mixture was filtered through a pad of Celite and the filtrate concentrated in *vacuo*. The product was purified by column chromatography using hexanes/EtOAc (95:5, v/v) as the eluent to afford alcohol *epi-25* (2.4 g, 11 mmol) in 92% yield.  $[\alpha]_D^{35} = +4.4$  (*c* 1, CHCl<sub>3</sub>), all other physical characteristics were identical to compound **25**.

**Alcohol epi 33 by resolution**. Obtained by an identical route as detailed for racemic alcohol **24**. Yield 41%. TLC  $R_f = 0.24$  (20% EtOAc/Hexanes).  $[\alpha]_D^{37} = -5.3$  (*c* 1.5, CHCl<sub>3</sub>). IR (KBr): 3420, 2959, 2931, 2858, 1467, 1109, 703 cm<sup>-1</sup>; <sup>1</sup>H NMR (500 MHz, CDCl<sub>3</sub>):  $\delta$  7.80-7.64 (m, 4H), 7.44-7.32 (m, 6H), 3.76 (dd, *J* = 11.0, 4.0 Hz, 1H), 3.35 (dd, *J* = 10.0, 4.0 Hz, 1H), 3.67-3.61 (m, 2H), 1.68-1.62 (m, 1H), 1.38-1.24 (m, 2H), 1.08 (s, 9H), 0.75 (t, *J* = 7.0 Hz, 3H). <sup>13</sup>C NMR (75 MHz, CDCl<sub>3</sub>):  $\delta$  135.5, 134.8, 129.8,

127.7, 67.2, 65.9, 43.8, 26.8, 20.5, 19.1, 11.7. MS (ESI) 365 [M+Na]<sup>+</sup>. HRMS (ESI) *m/z* calcd for C<sub>21</sub>H<sub>30</sub>O<sub>2</sub>NaSi 365.19073; found 365.19115.

**Acetate via resolution.** Yield 43%. TLC R<sub>f</sub> = 0.32 (20% EtOAc/Hexanes). [α]<sub>D</sub><sup>37</sup> = +2.9 (*c* 1.3, CHCl<sub>3</sub>). IR (KBr): 2959, 2932, 1741, 1240, 1110, 703 cm<sup>-1</sup>. <sup>1</sup>H NMR (300 MHz, CDCl<sub>3</sub>): δ 7.74-7.62 (m, 4H), 7.48-7.32 (m, 6H), 4.18-4.09 (m, 2H), 3.72-3.58 (m, 2H), 1.98 (s, 3H), 1.80-1.68 (m, 1H), 1.48-1.30 (m, 2H), 1.03 (s, 9H), 0.87 (t, *J* = 7.6 Hz, 3H). <sup>13</sup>C NMR (75 MHz, CDCl<sub>3</sub>): δ 170.9, 135.5, 133.5, 129.5, 127.5, 64.3, 62.8, 41.8, 26.7, 26.5, 20.7, 19.2, 11.3. MS (ESI) 407 [M+Na]<sup>+</sup>. HRMS (ESI) *m/z* calcd for C<sub>23</sub>H<sub>33</sub>O<sub>3</sub>Si 385.21935; found 385.21866.

**Compound 33.** Prepared by K<sub>2</sub>CO<sub>3</sub> catalyzed hydrolysis as described for compound **26**. Yield 90%. [α]<sub>D</sub><sup>37</sup> = +5.1 (*c* 1.2, CHCl<sub>3</sub>). The IR, NMR data were identical to that of *epi*-**33**.



## <sup>1</sup>H NMR spectrum of Compound 11

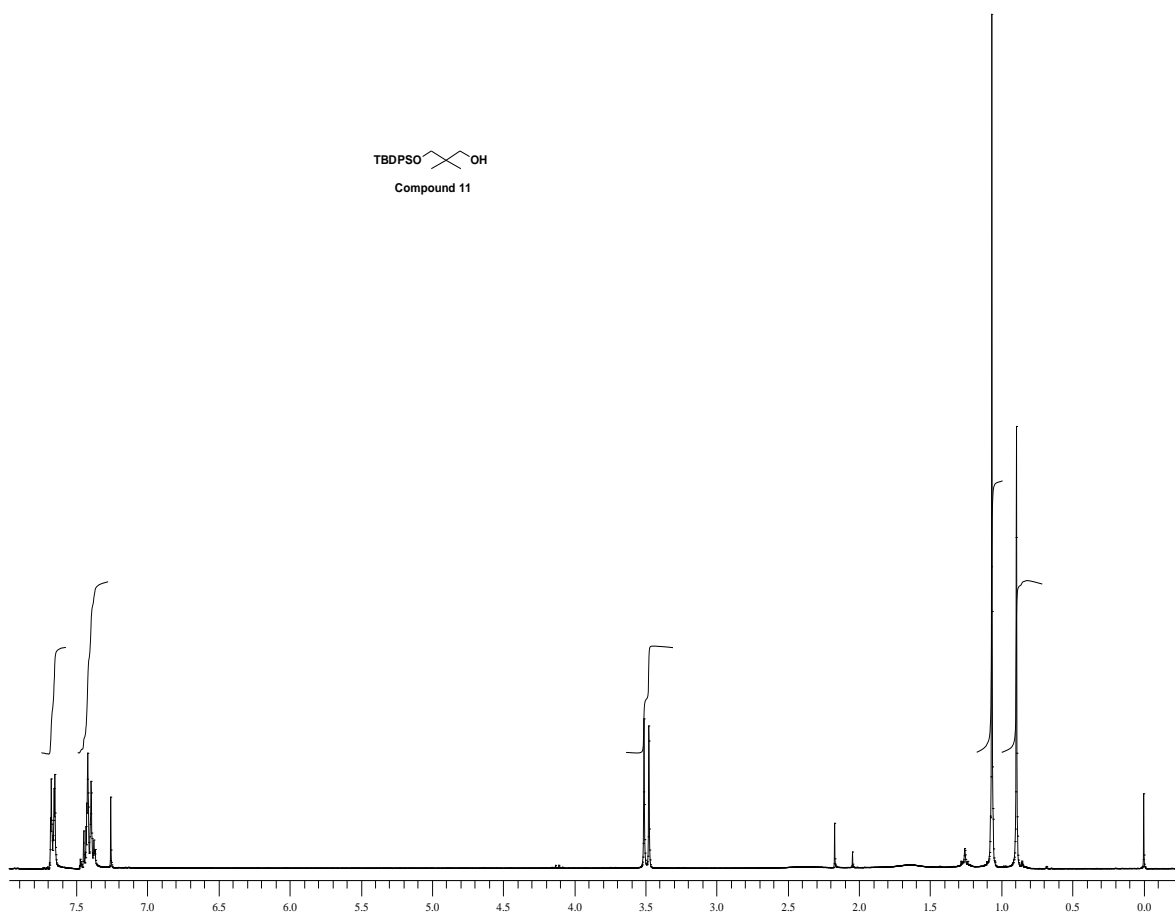

## <sup>13</sup>C NMR spectrum of Compound 11

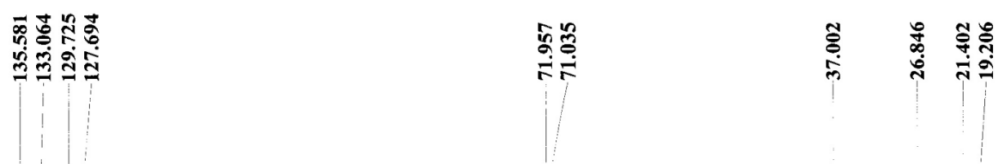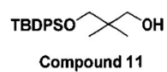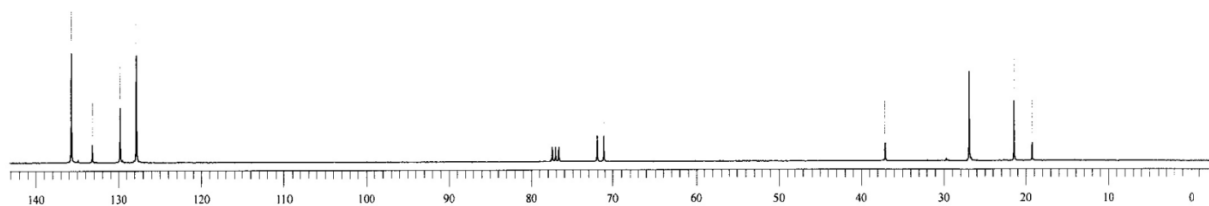

## <sup>1</sup>H NMR spectrum of Compound 9

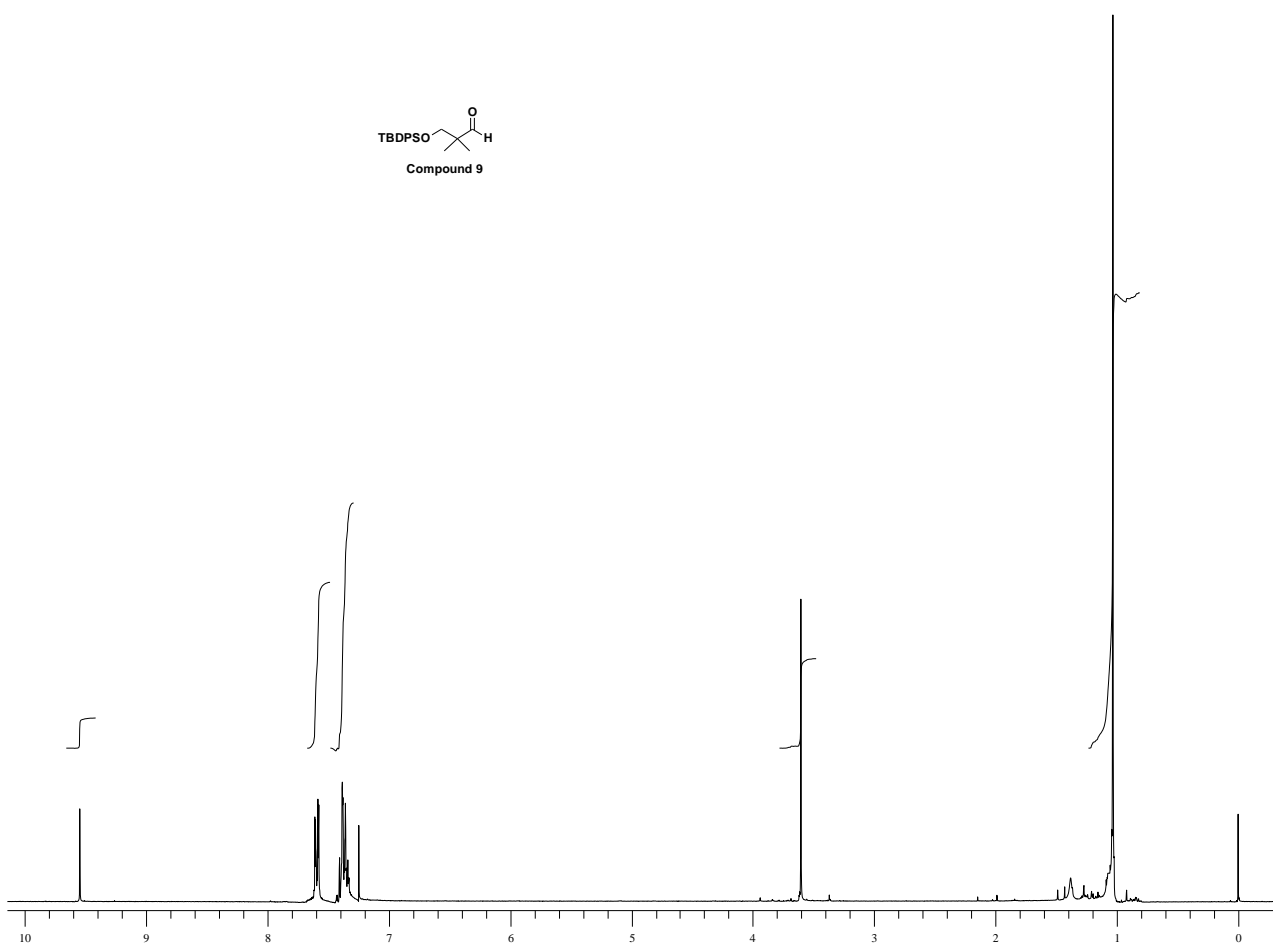

### $^{13}\text{C}$ NMR spectrum of Compound 9

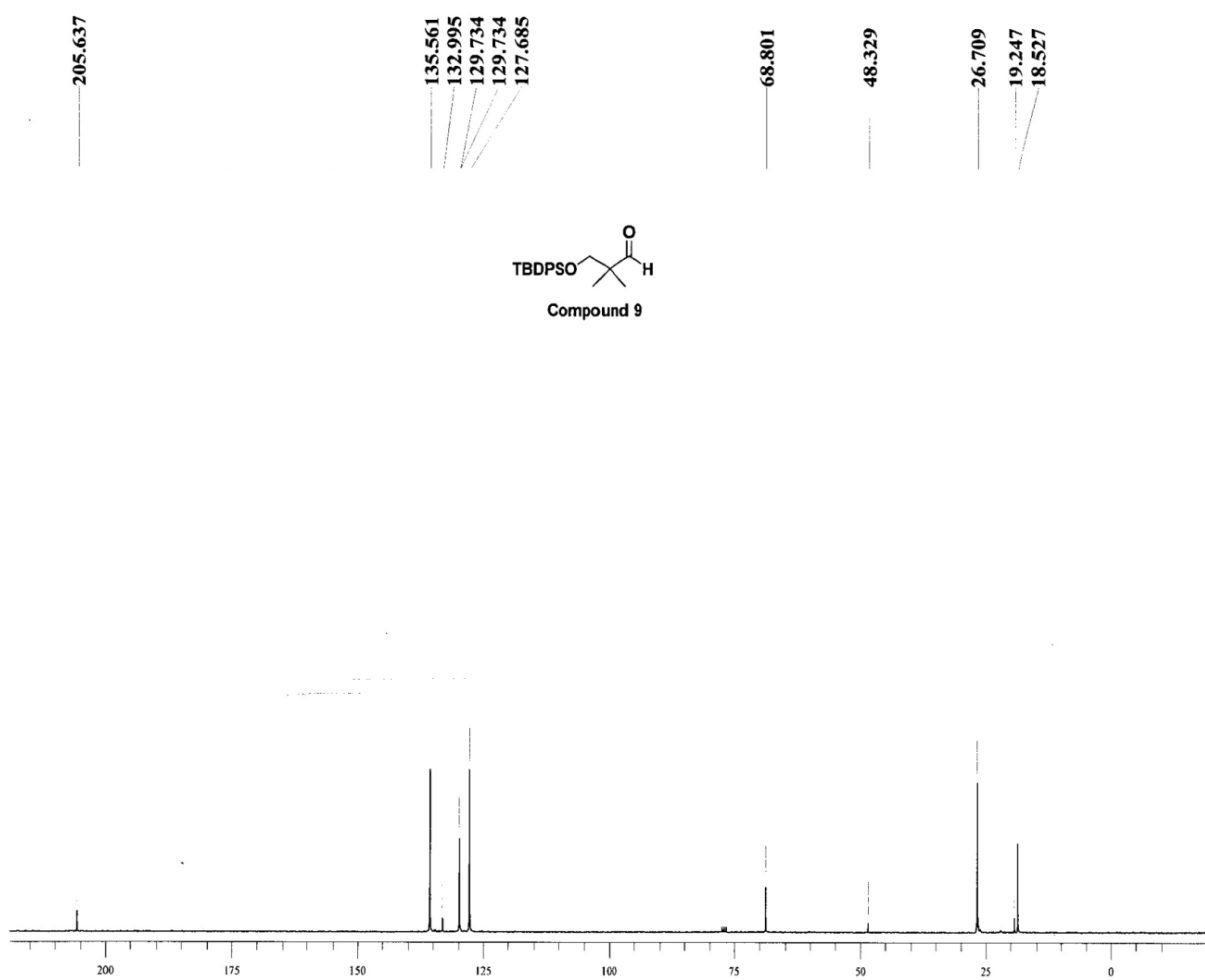

# <sup>1</sup>H NMR spectrum of Compound 8

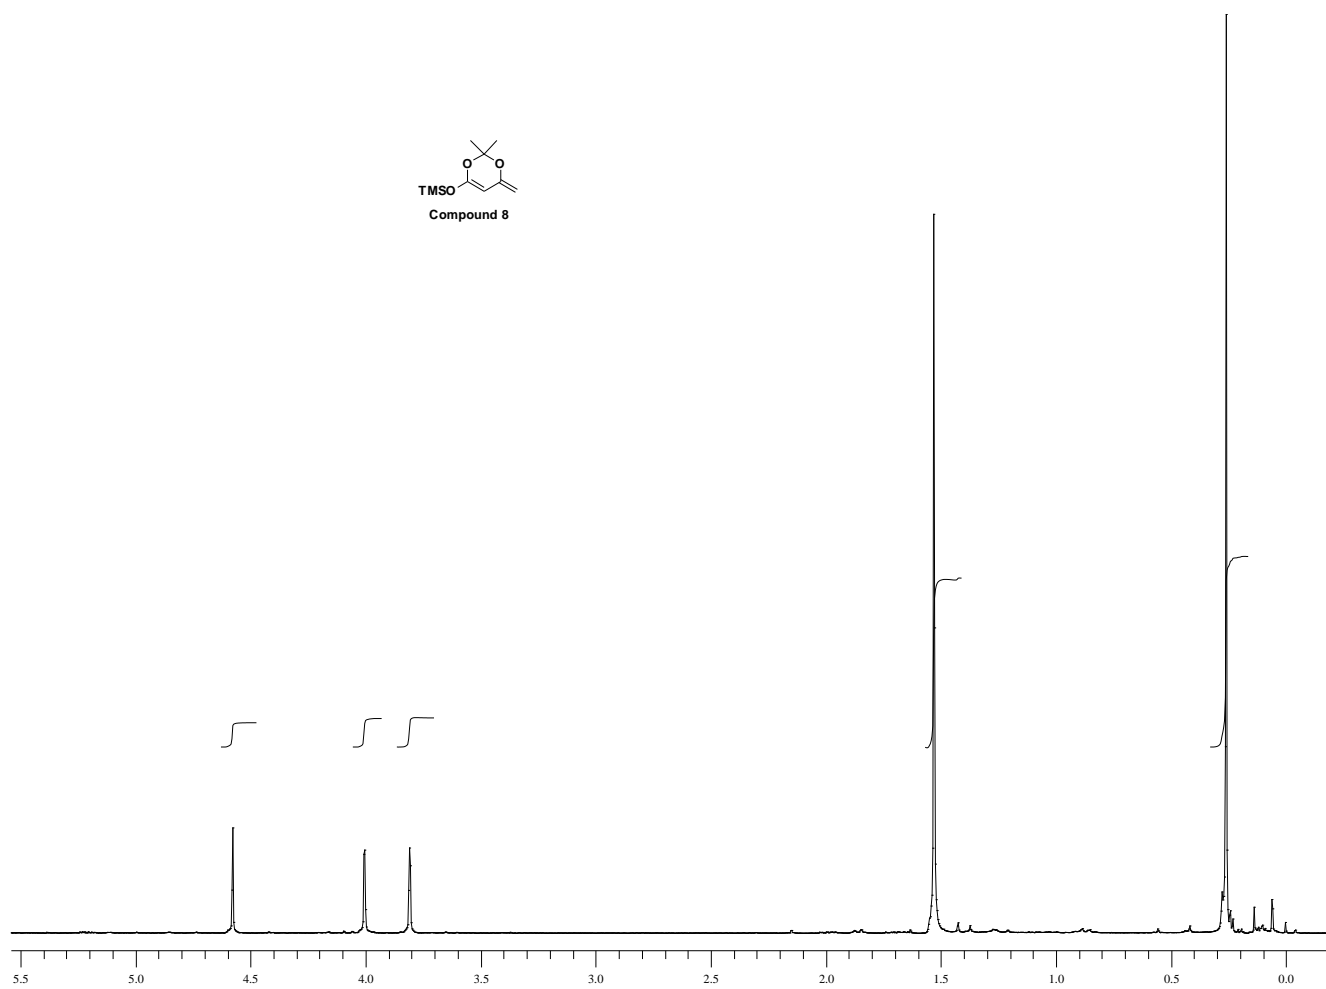

## <sup>1</sup>H NMR spectrum of Compound 12

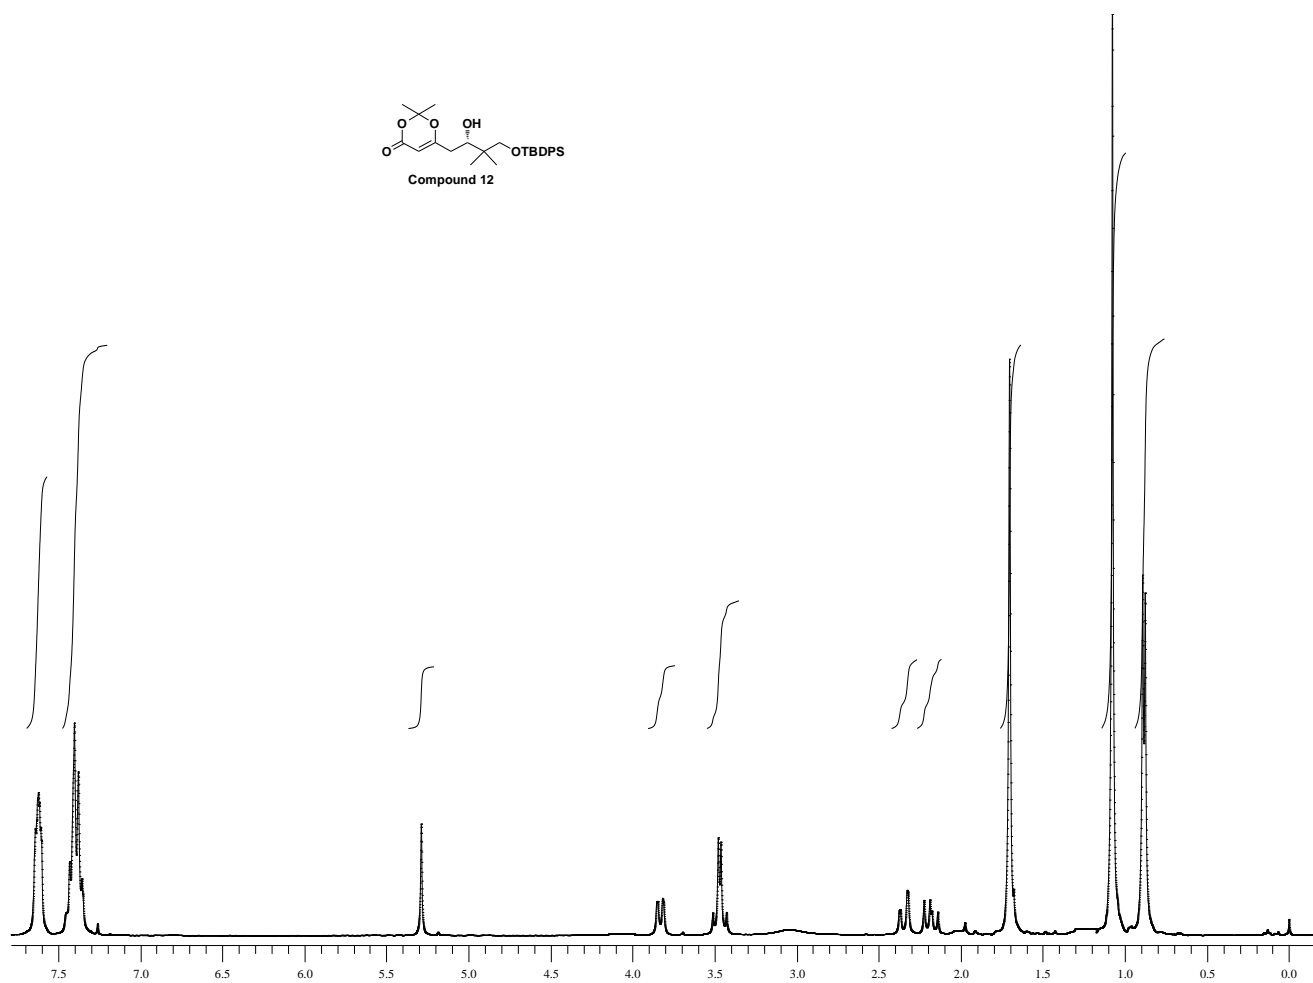

## <sup>13</sup>C NMR spectrum of Compound 12

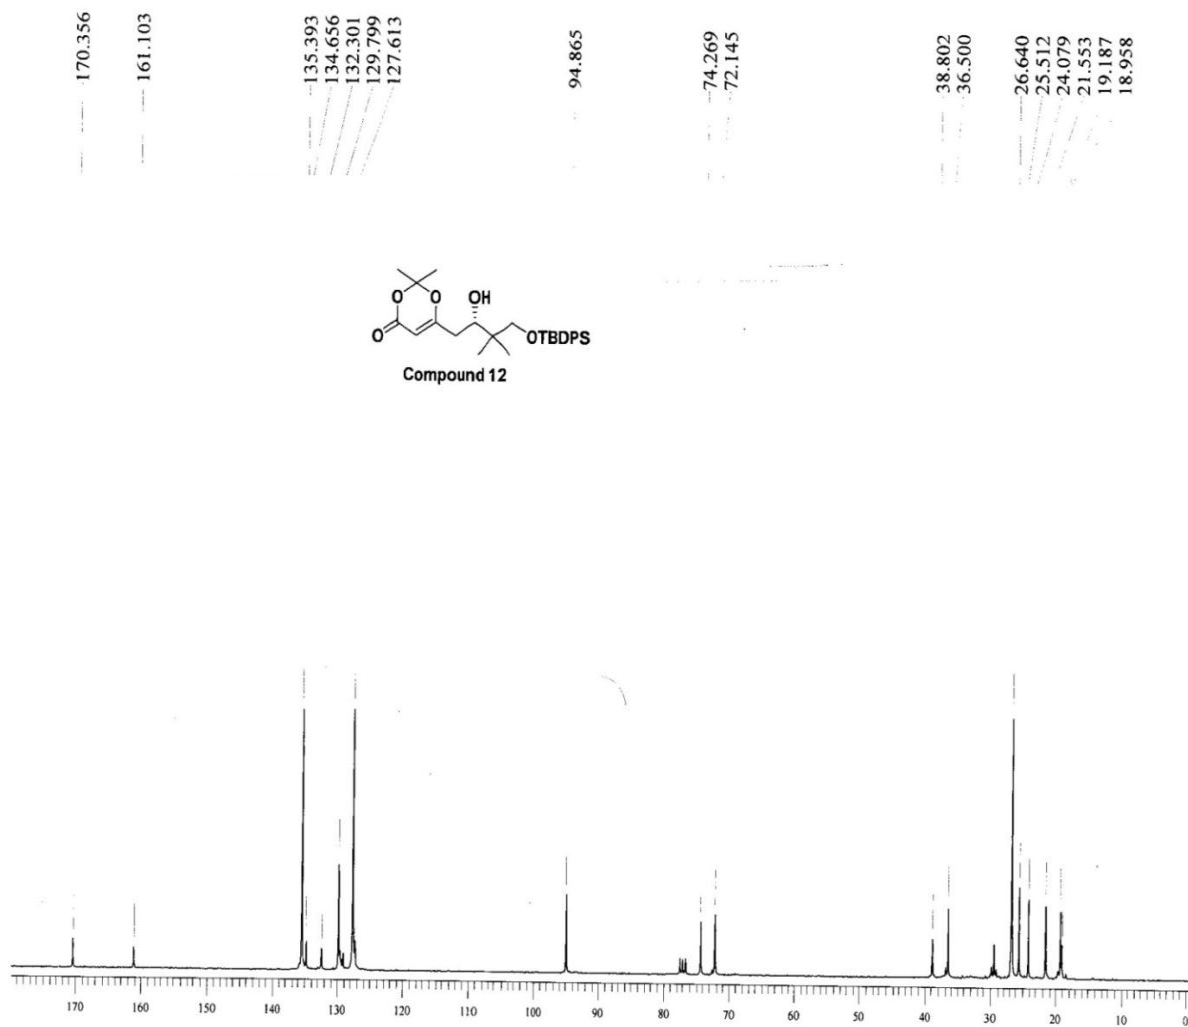

## HPLC of Racemic compound 12



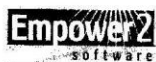

## Injection Summary Report

| SAMPLE INFORMATION |                          |                     |              |
|--------------------|--------------------------|---------------------|--------------|
| Sample Name:       | VV MA RAC                | Acquired By:        | System       |
| Sample Type:       | Standard                 | Sample Set Name:    |              |
| Vial:              | 1                        | Acq. Method Set:    | VV 15% IPA   |
| Injection #:       | 3                        | Processing Method:  | chiral       |
| Injection Volume:  | 10.00 ul                 | Channel Name:       | 254.0nm      |
| Run Time:          | 30.0 Minutes             | Proc. Chnl. Descr.: | PDA 254.0 nm |
| Date Acquired:     | 6/24/2009 3:29:25 PM IST |                     |              |
| Date Processed:    | 6/24/2009 4:53:15 PM IST |                     |              |

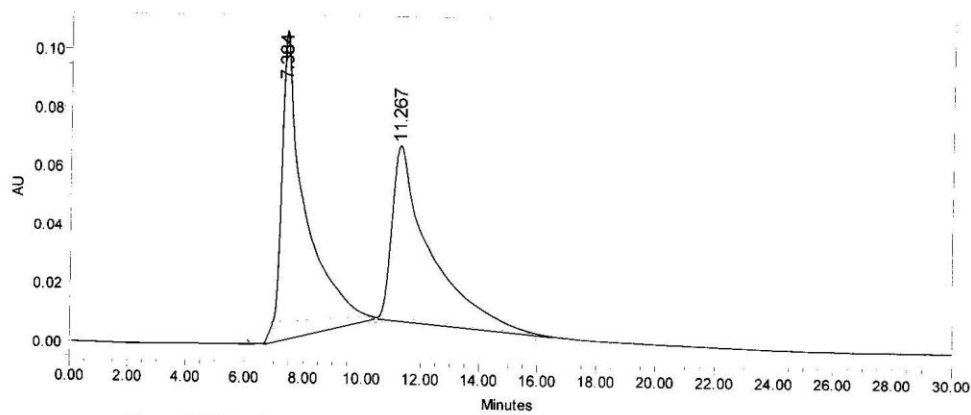

Channel: 2998; Processed Channel: PDA 254.0 nm; Result Id: 9160; Processing Method: chiral

### Processed Channel Descr.: PDA 254.0 nm

|   | Processed Channel Descr. | RT     | Area    | % Area | Height |
|---|--------------------------|--------|---------|--------|--------|
| 1 | PDA 254.0 nm             | 7.384  | 5030790 | 49.33  | 98878  |
| 2 | PDA 254.0 nm             | 11.267 | 5167702 | 50.67  | 59006  |

Reported by User: System  
Report Method: Injection Summary Report  
Report Method ID: 1005  
Page: 1 of 1

Project Name: APRIL 2009  
Date Printed:  
9/5/2009  
10:03:13 AM Asia/Calcutta

## HPLC of compound 12

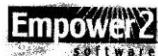

## Injection Summary Report

### SAMPLE INFORMATION

|                   |                          |                     |              |
|-------------------|--------------------------|---------------------|--------------|
| Sample Name:      | VV MA CHIRAI Tol Binap   | Acquired By:        | System       |
| Sample Type:      | Standard                 | Sample Set Name:    |              |
| Vial:             | 1                        | Acq. Method Set:    | VV 15% IPA   |
| Injection #:      | 5                        | Processing Method:  | jk           |
| Injection Volume: | 10.00 ul                 | Channel Name:       | 254.0nm      |
| Run Time:         | 30.0 Minutes             | Proc. Chnl. Descr.: | PDA 254.0 nm |
| Date Acquired:    | 6/24/2009 4:26:30 PM IST |                     |              |
| Date Processed:   | 6/26/2009 8:33:23 PM IST |                     |              |

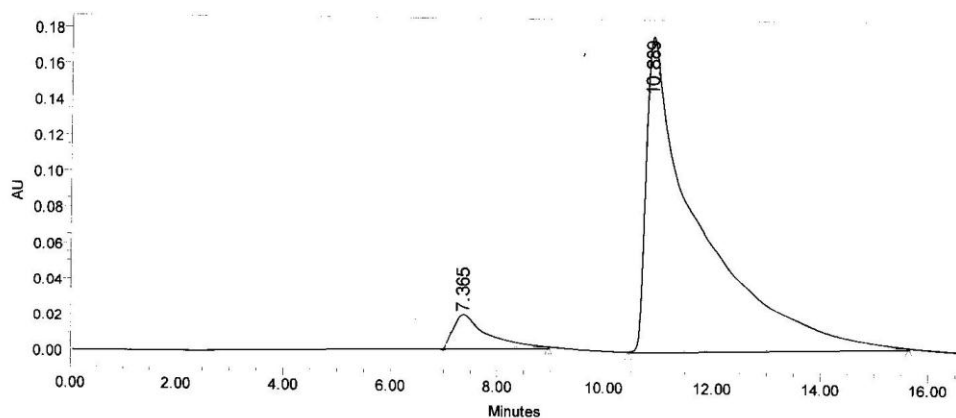

Channel: 2998; Processed Channel: PDA 254.0 nm; Result Id: 9212; Processing Method: jk

#### Processed Channel Descr.: PDA 254.0 nm

|   | Processed Channel Descr. | RT     | Area     | % Area | Height |
|---|--------------------------|--------|----------|--------|--------|
| 1 | PDA 254.0 nm             | 7.365  | 831551   | 6.49   | 18744  |
| 2 | PDA 254.0 nm             | 10.889 | 11989563 | 93.51  | 175782 |

Reported by User: System  
Report Method: Injection Summary Report  
Report Method ID: 1005  
Page: 1 of 1

Project Name: APRIL 2009  
Date Printed: 9/5/2009  
9:53:34 AM Asia/Calcutta

# <sup>1</sup>H NMR spectrum of Compound 13

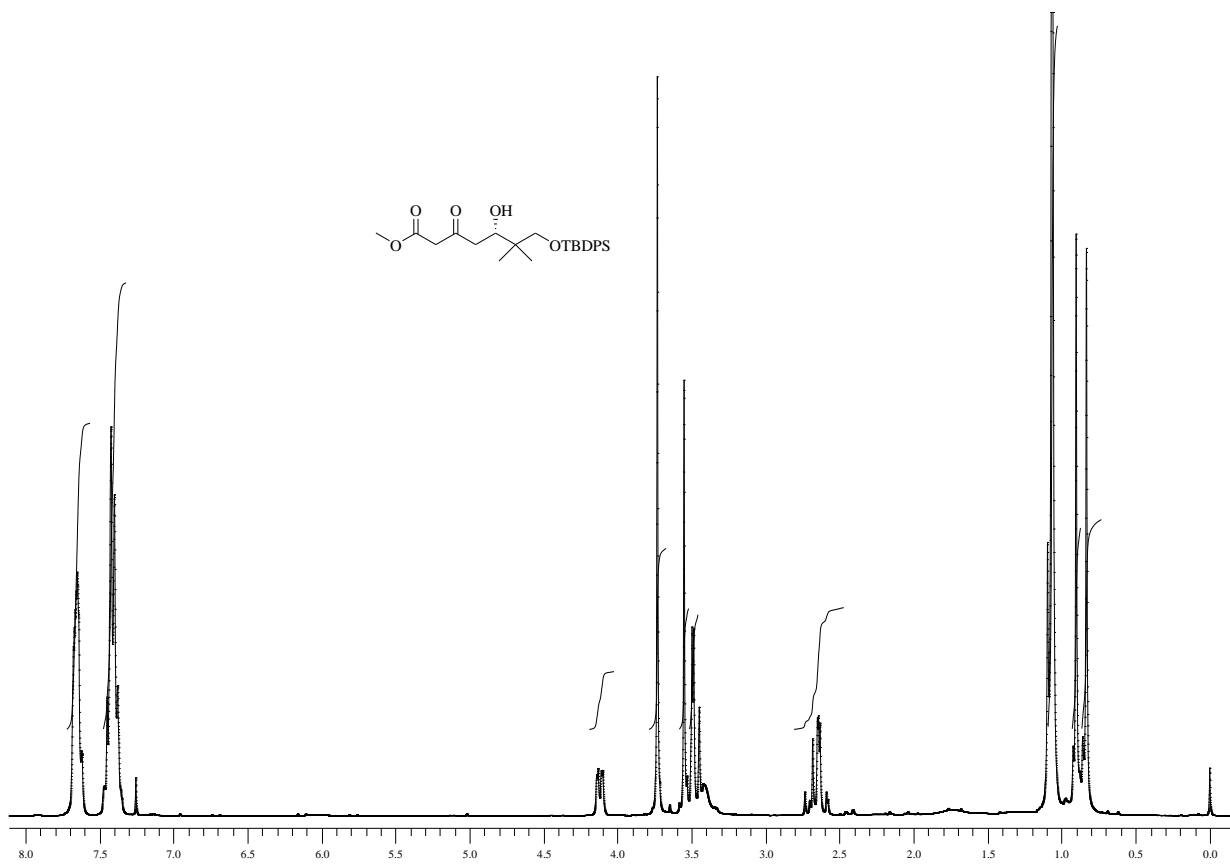

## $^{13}\text{C}$ NMR spectrum of Compound 13

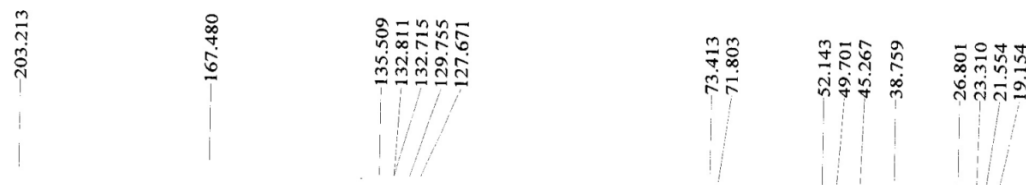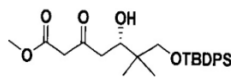

Compound 13

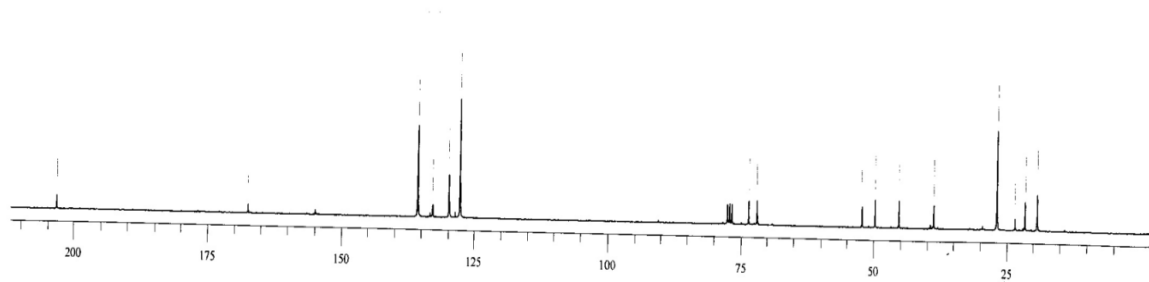

# <sup>1</sup>H NMR spectrum of Compound 14

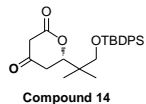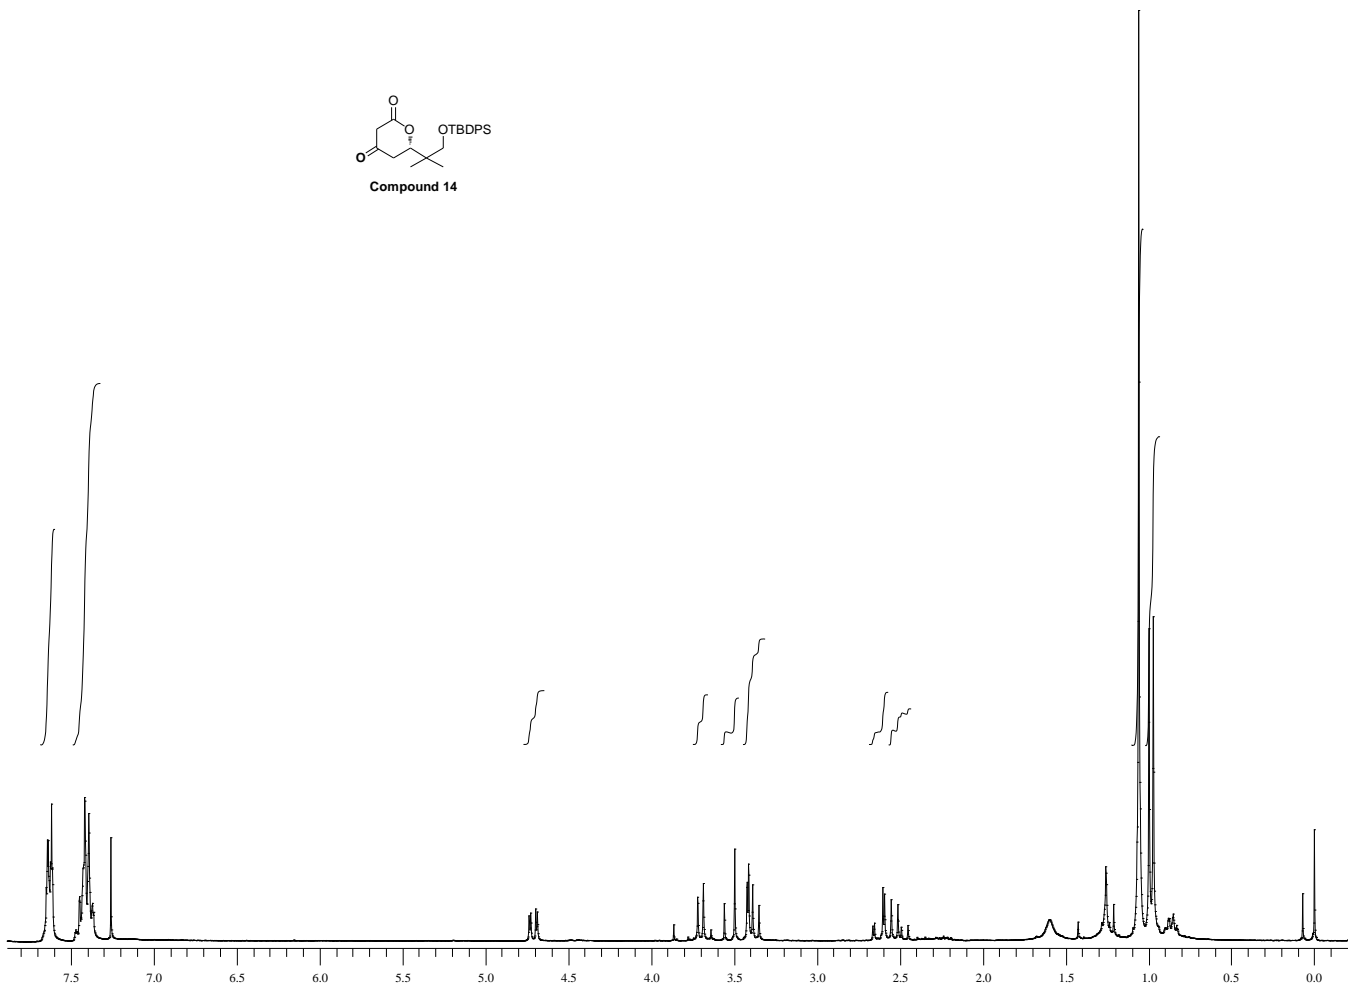

## <sup>13</sup>C NMR spectrum of Compound 14

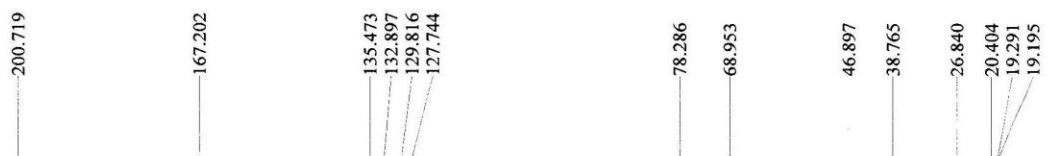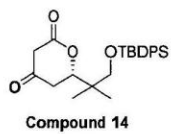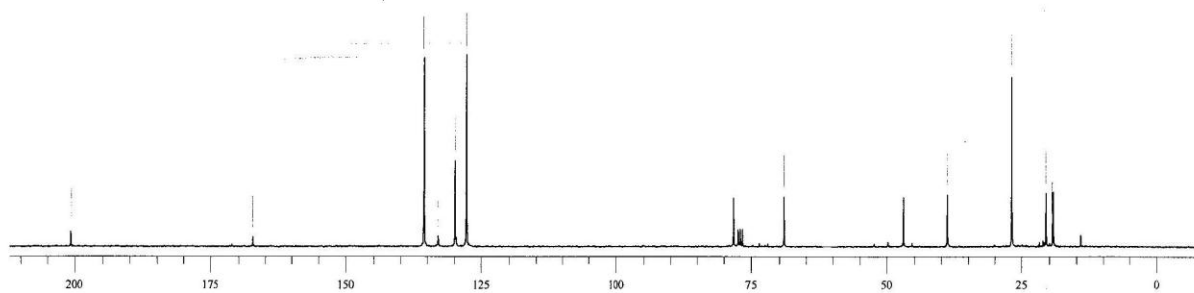

# <sup>1</sup>H NMR spectrum of Compound 15

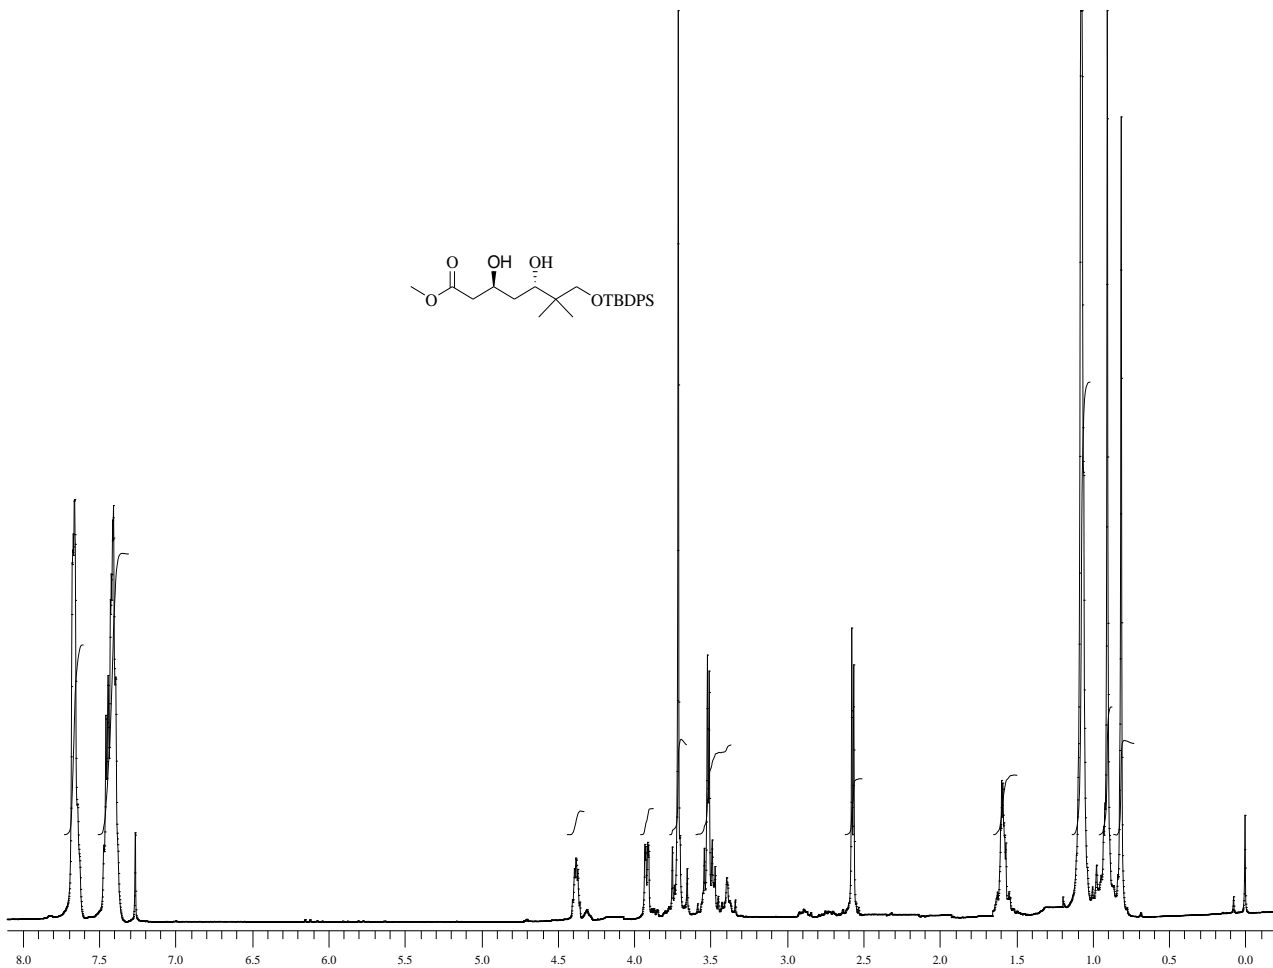

# <sup>13</sup>C NMR spectrum of Compound 15

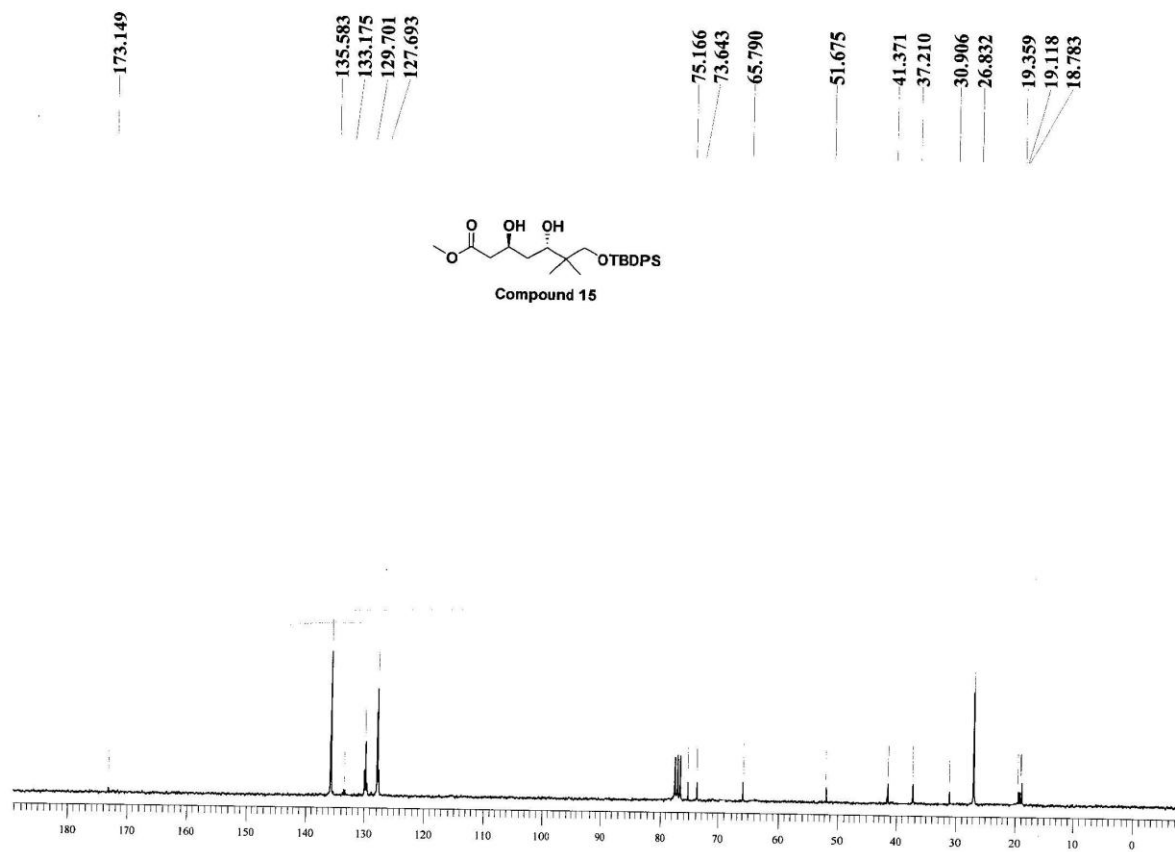



## <sup>1</sup>H NMR spectrum of Acetonide of Compound 15

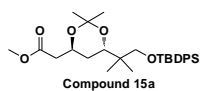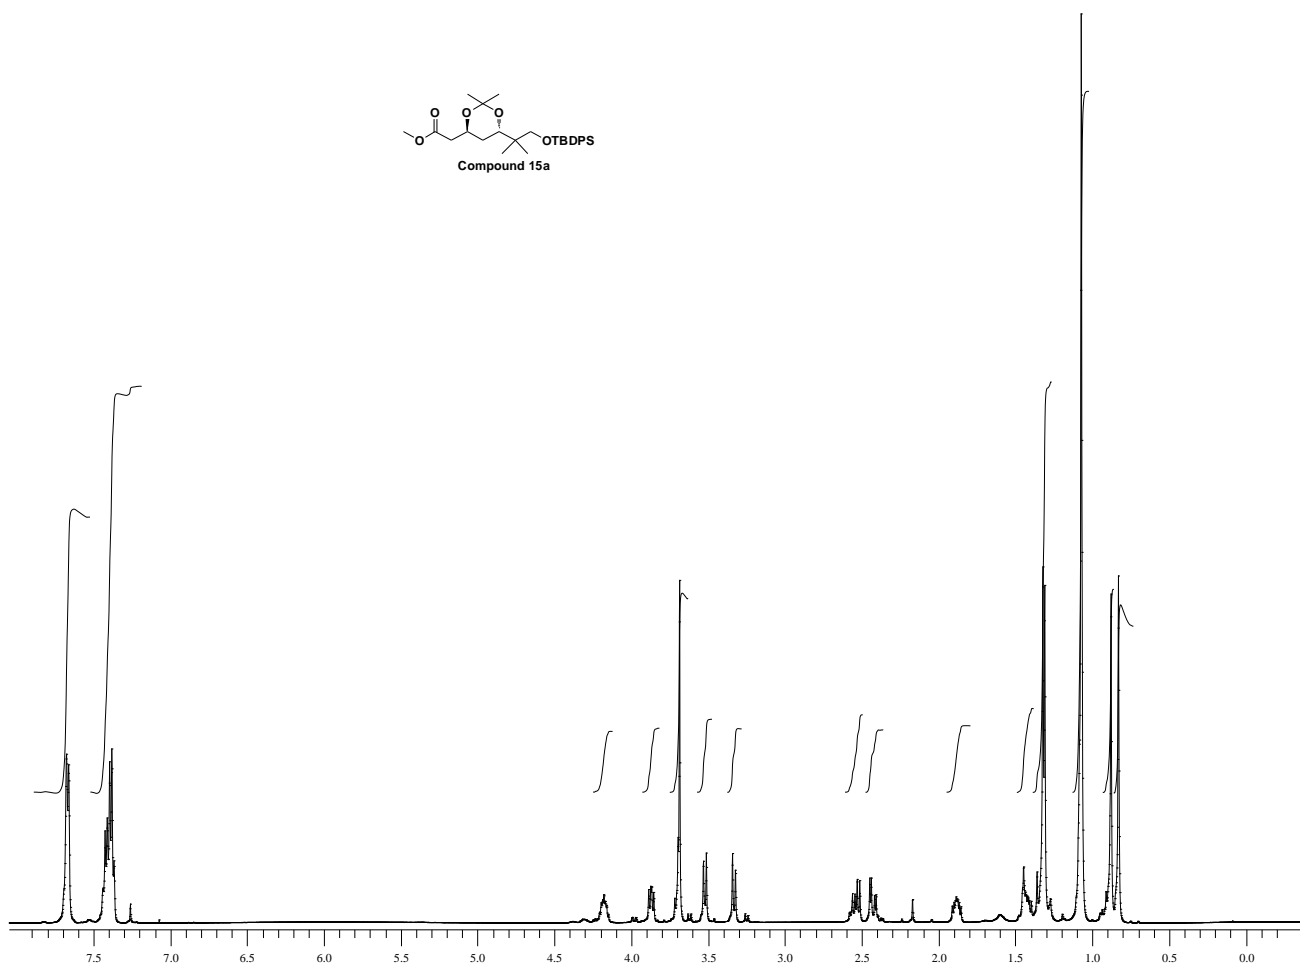

## <sup>13</sup>C NMR spectrum of Acetonide of Compound 15

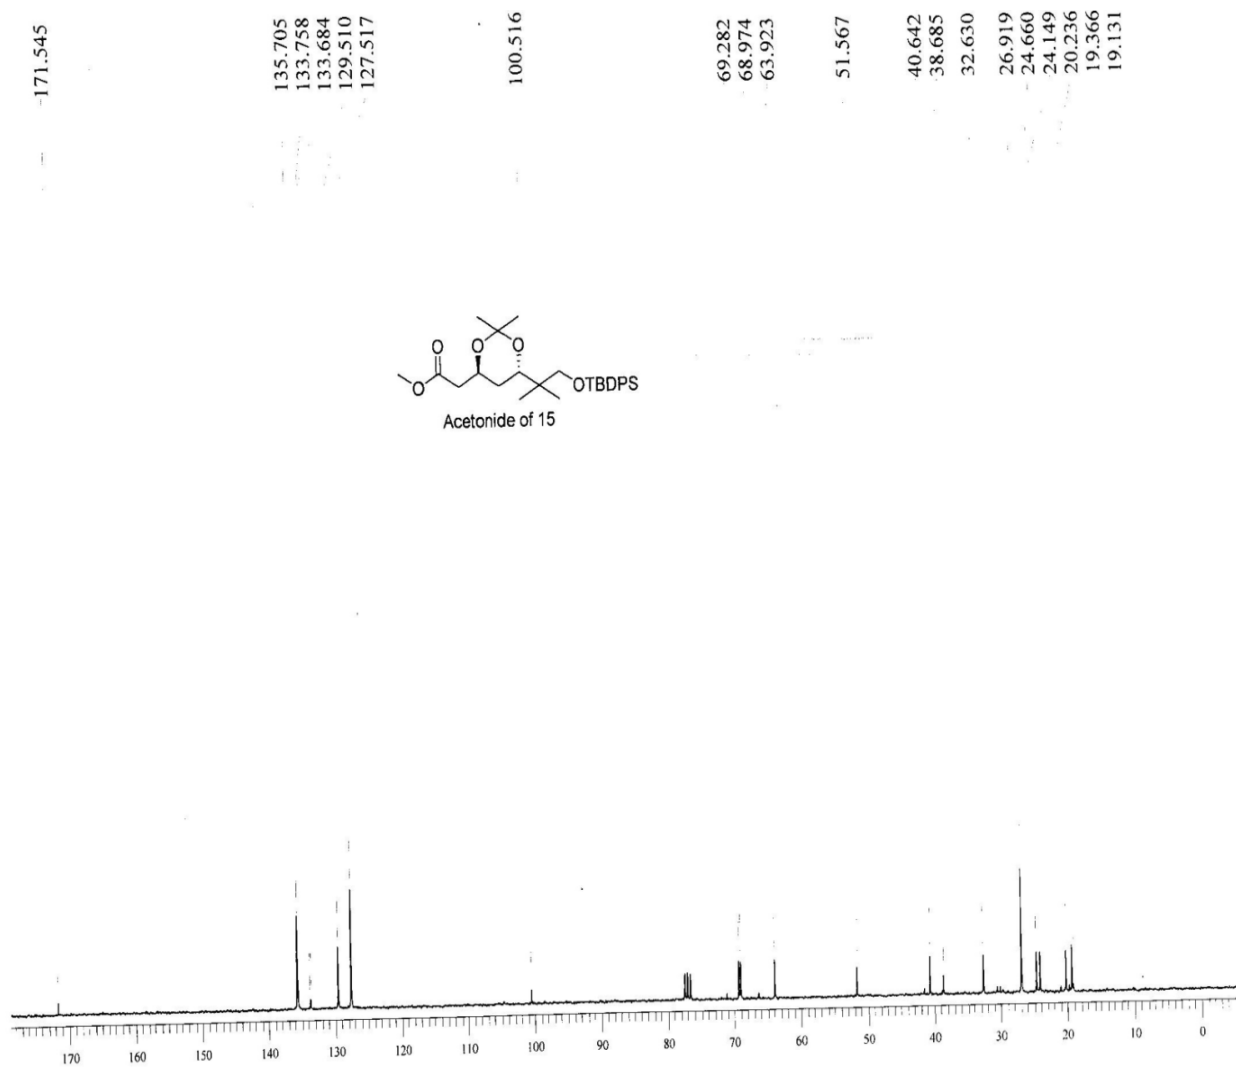

# <sup>1</sup>H NMR spectrum of Compound 16

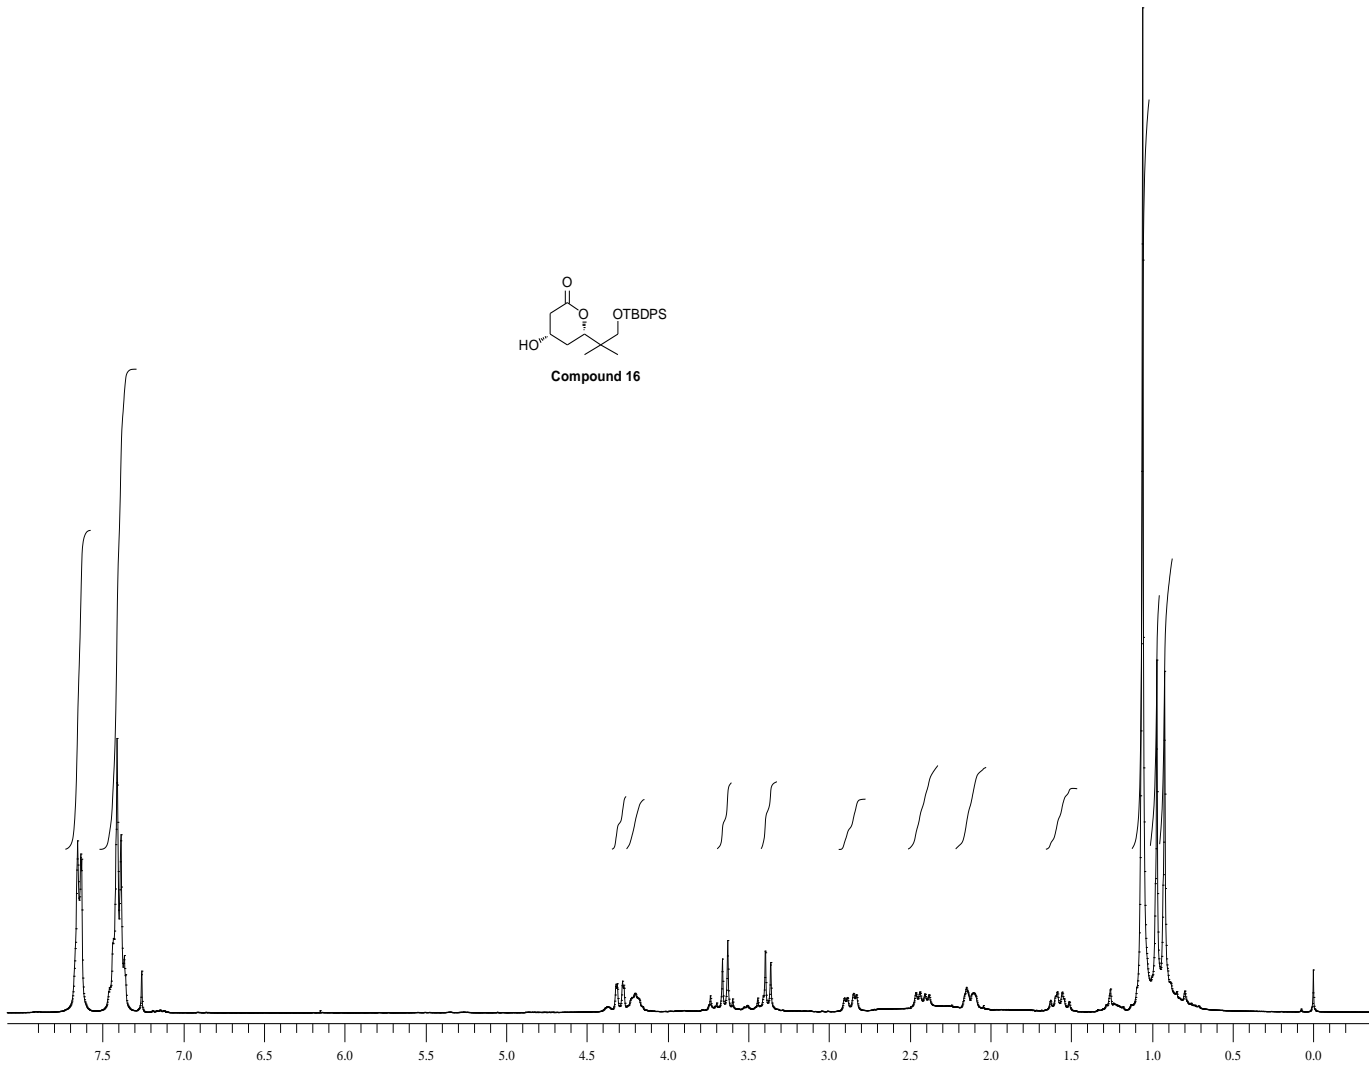

## <sup>13</sup>C NMR spectrum of Compound 16

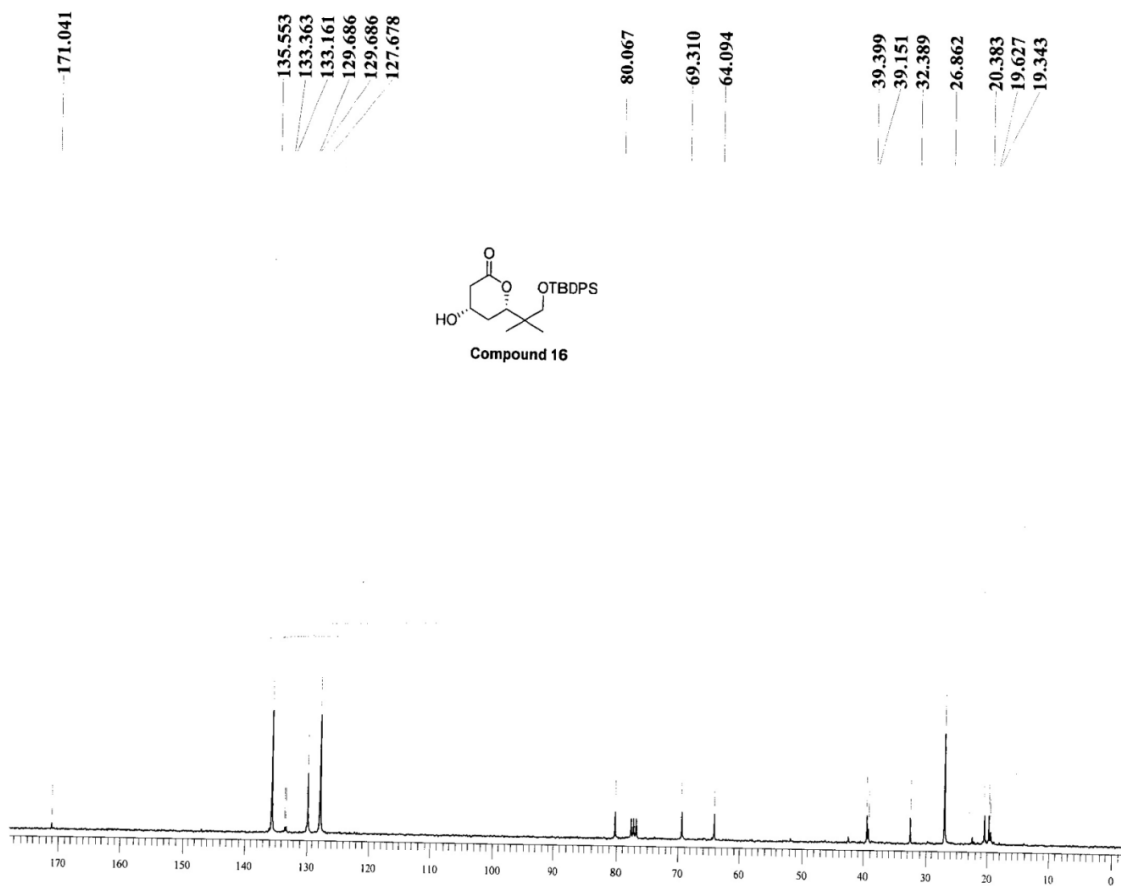

# <sup>1</sup>H NMR spectrum of Compound 7

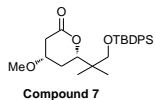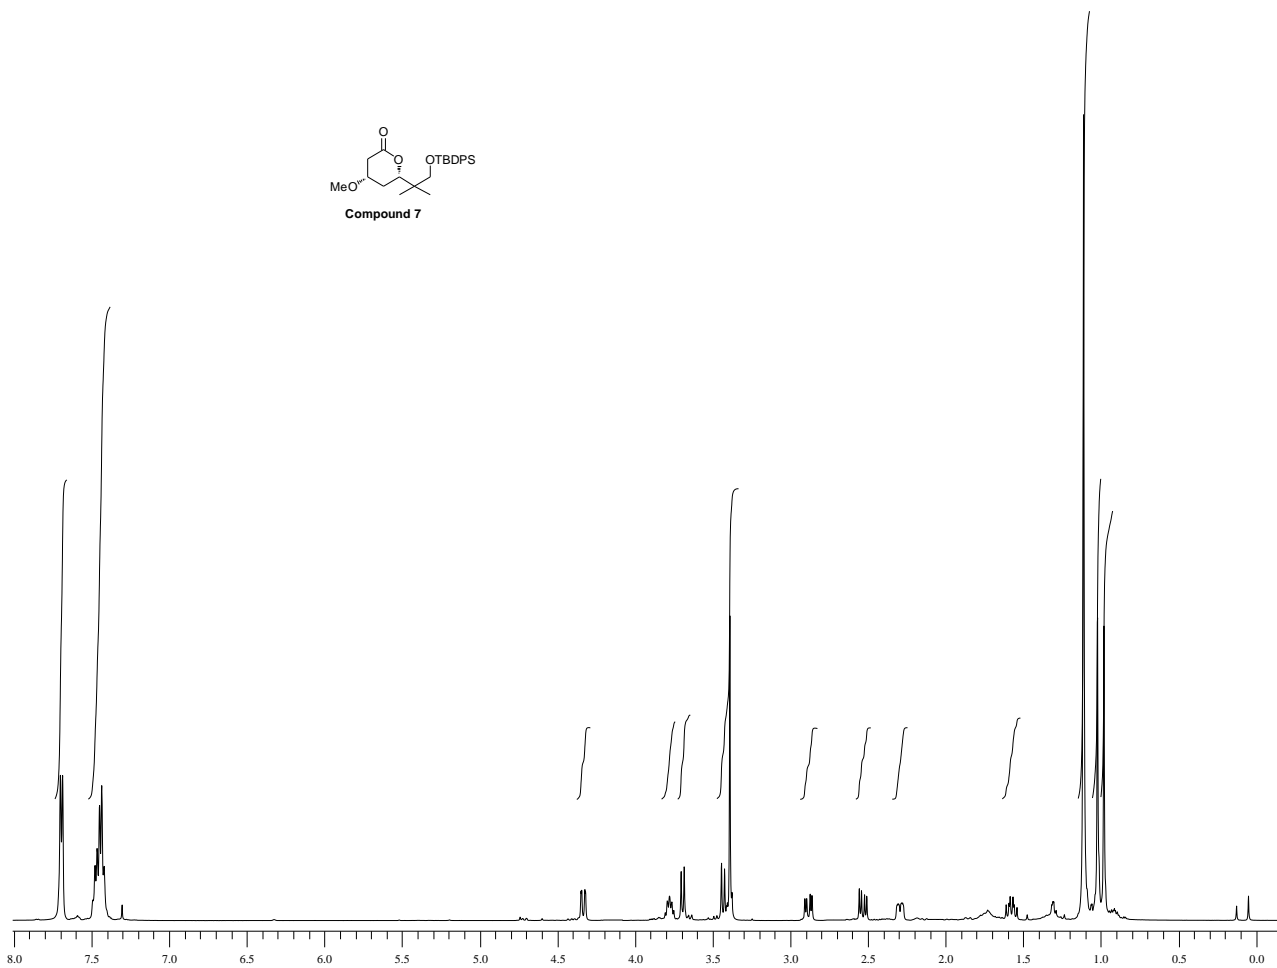

## <sup>13</sup>C NMR spectrum of Compound 7

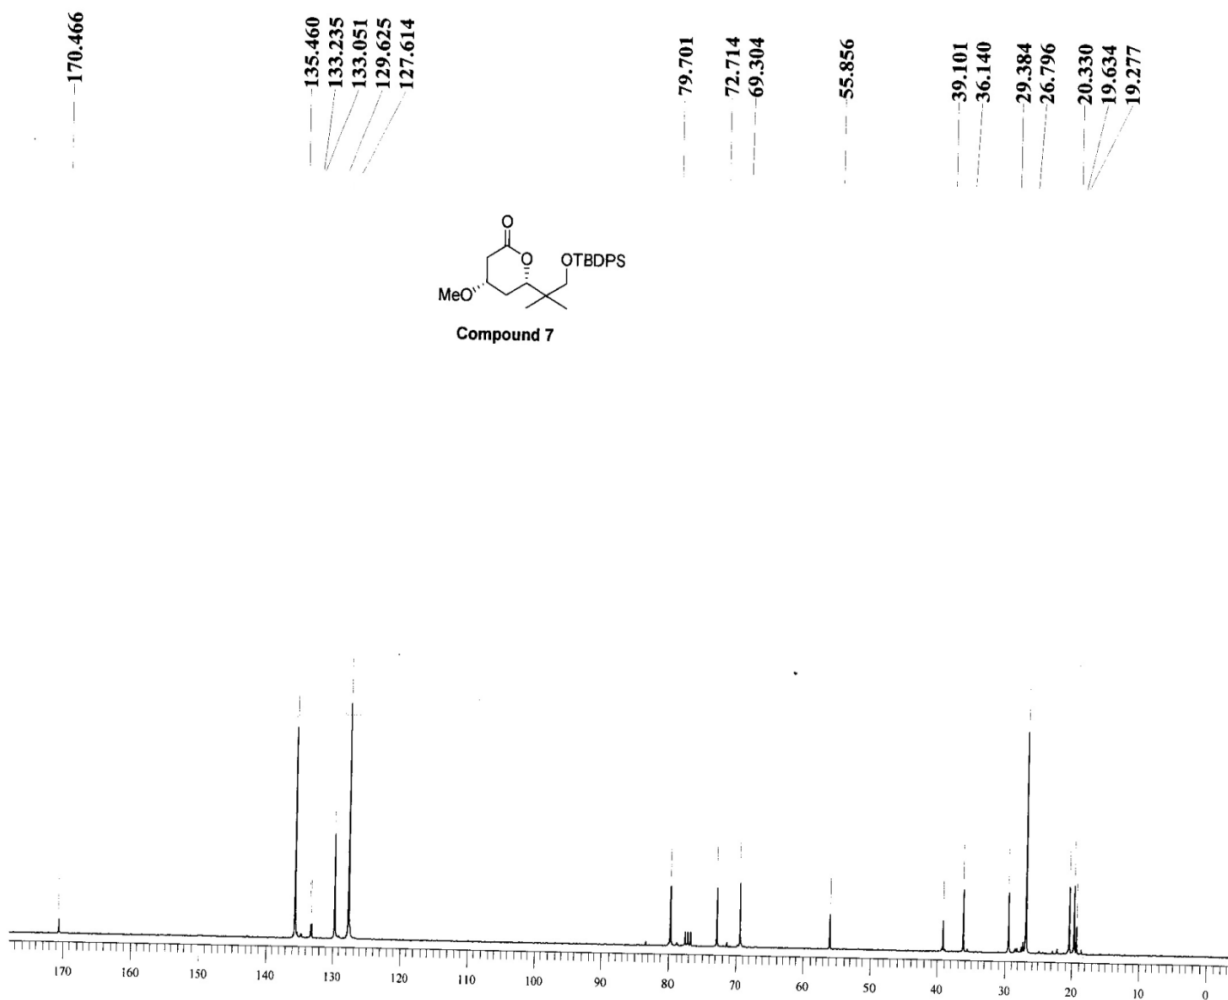

# <sup>1</sup>H NMR spectrum of Compound 17

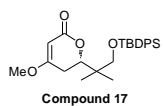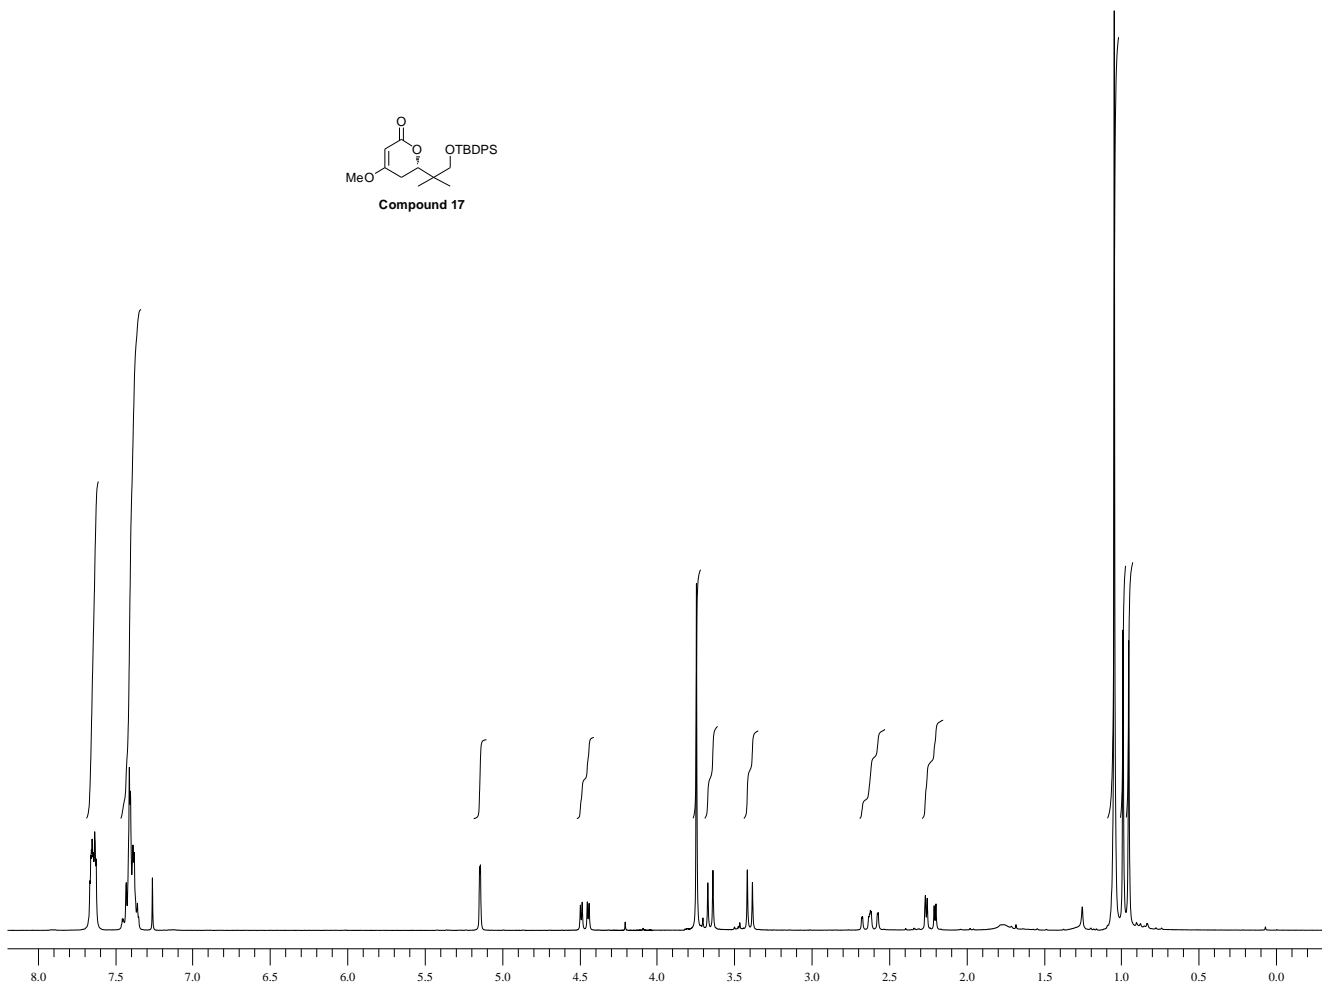

# <sup>13</sup>C NMR spectrum of Compound 17

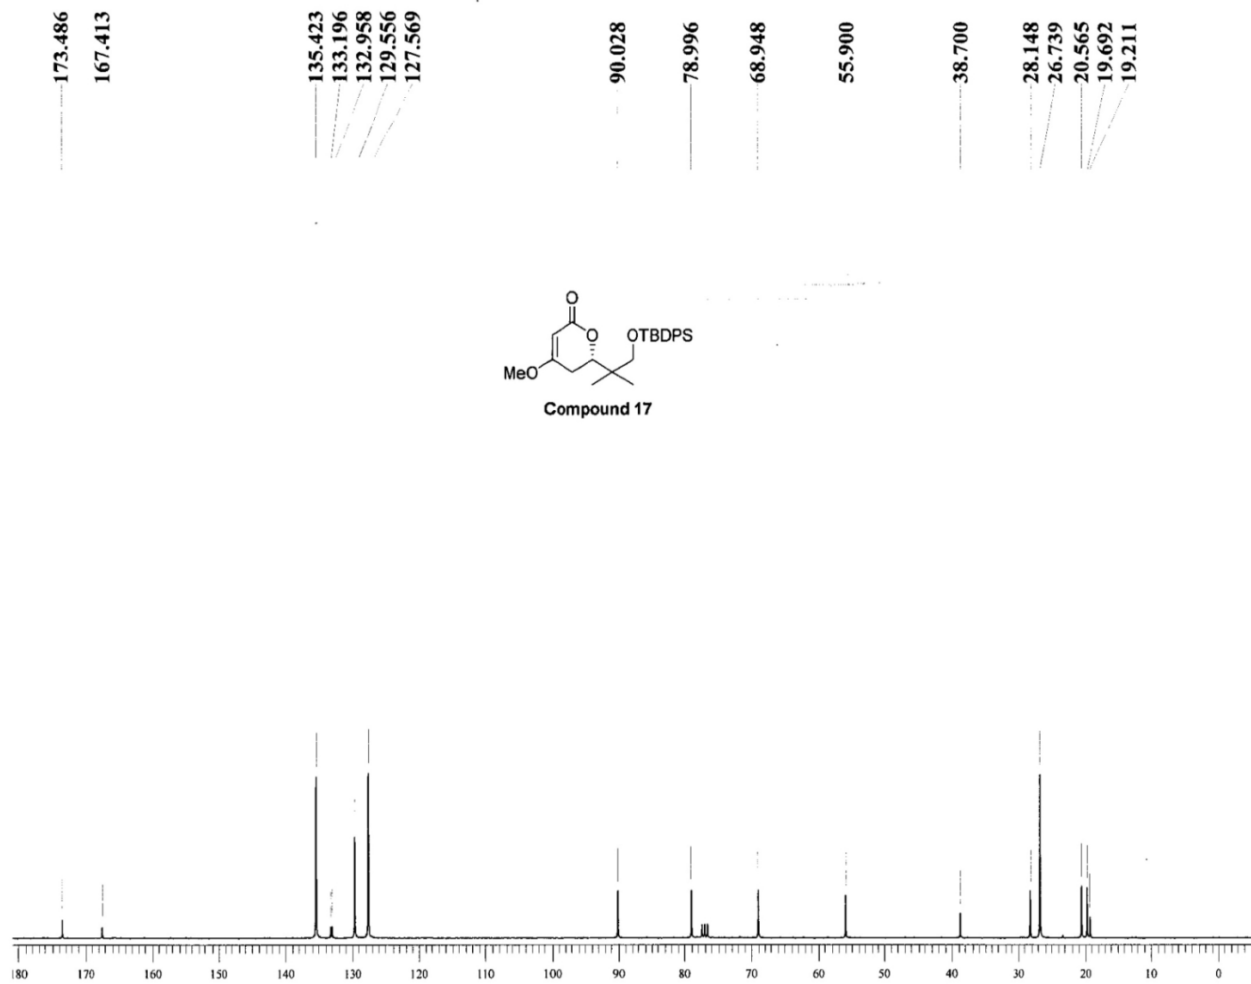



## <sup>1</sup>H NMR spectrum of Compound 29

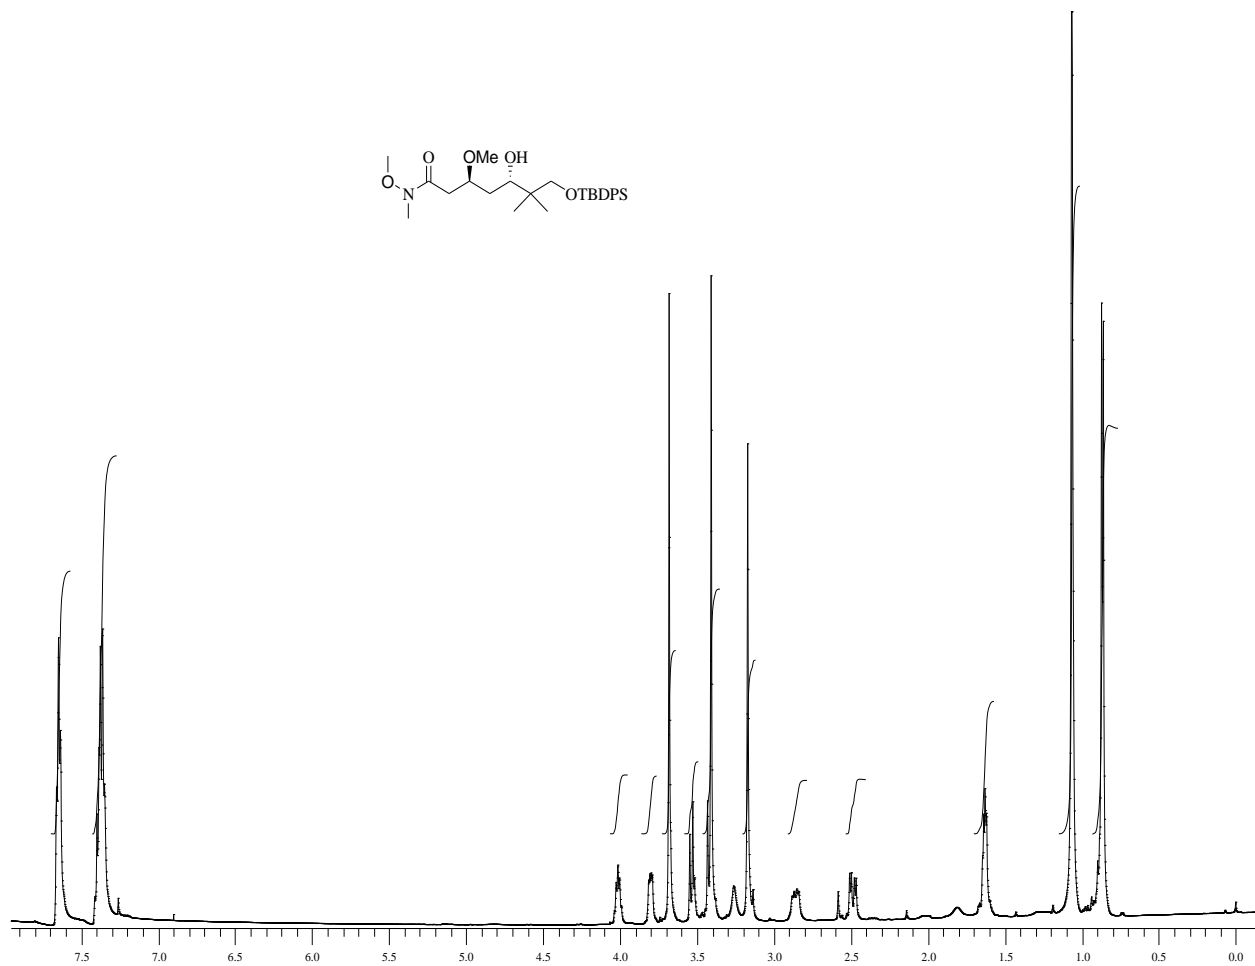

# <sup>13</sup>C NMR spectrum of Compound 29

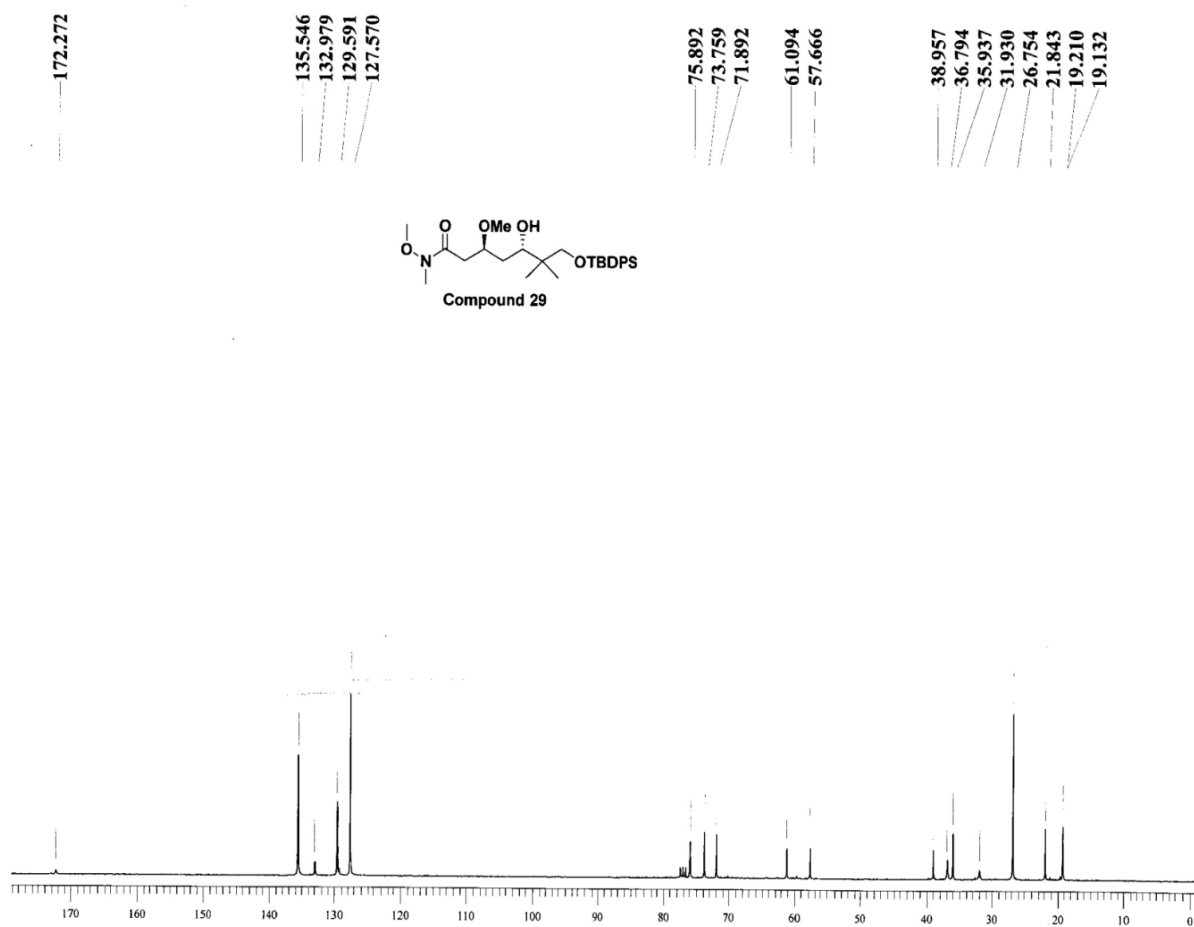

# <sup>1</sup>H NMR spectrum of Compound 18

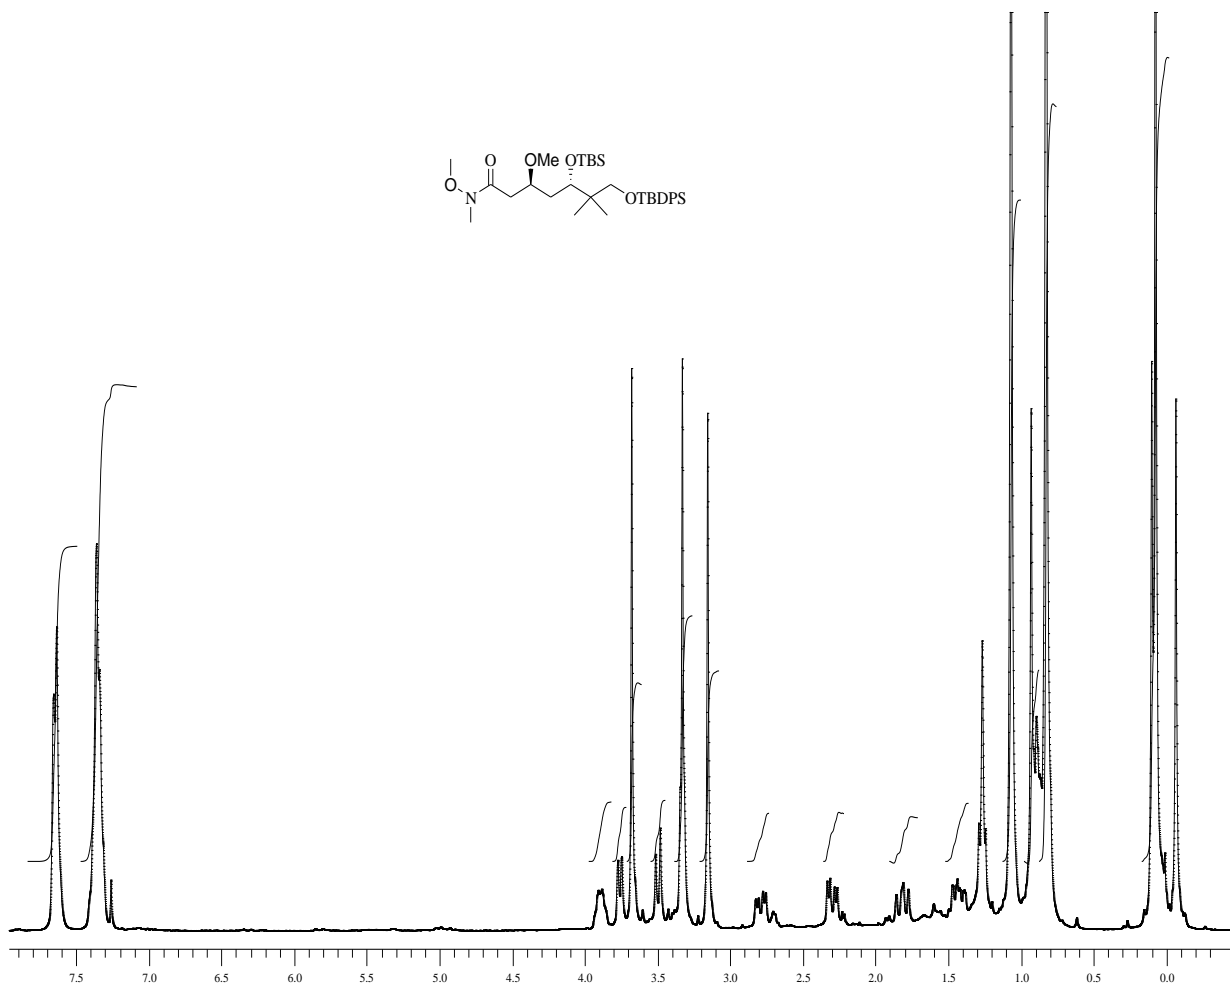

## <sup>13</sup>C NMR spectrum of Compound 18

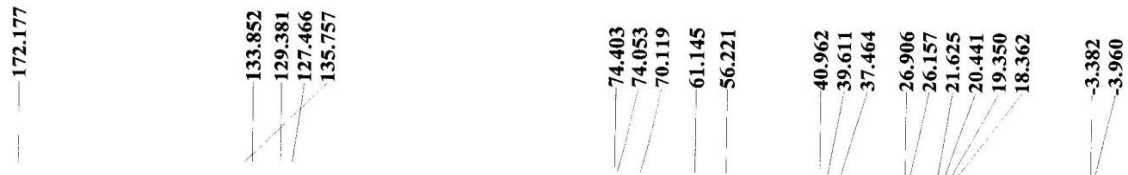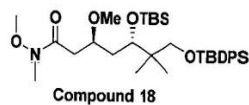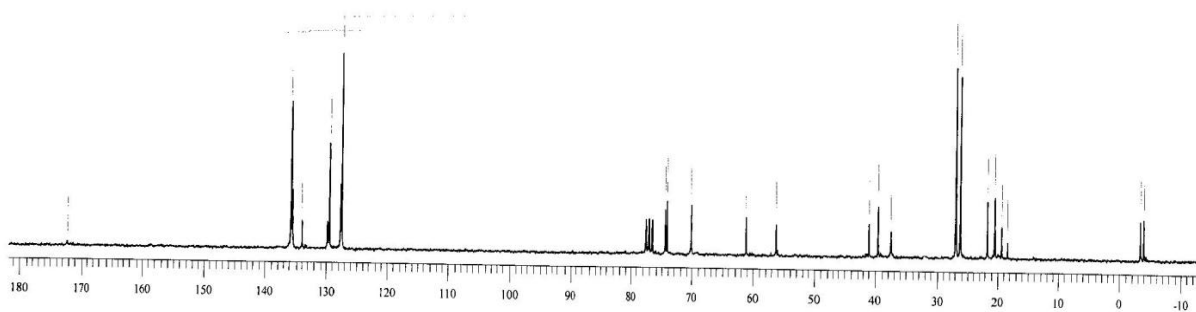

# <sup>1</sup>H NMR spectrum of Compound 23

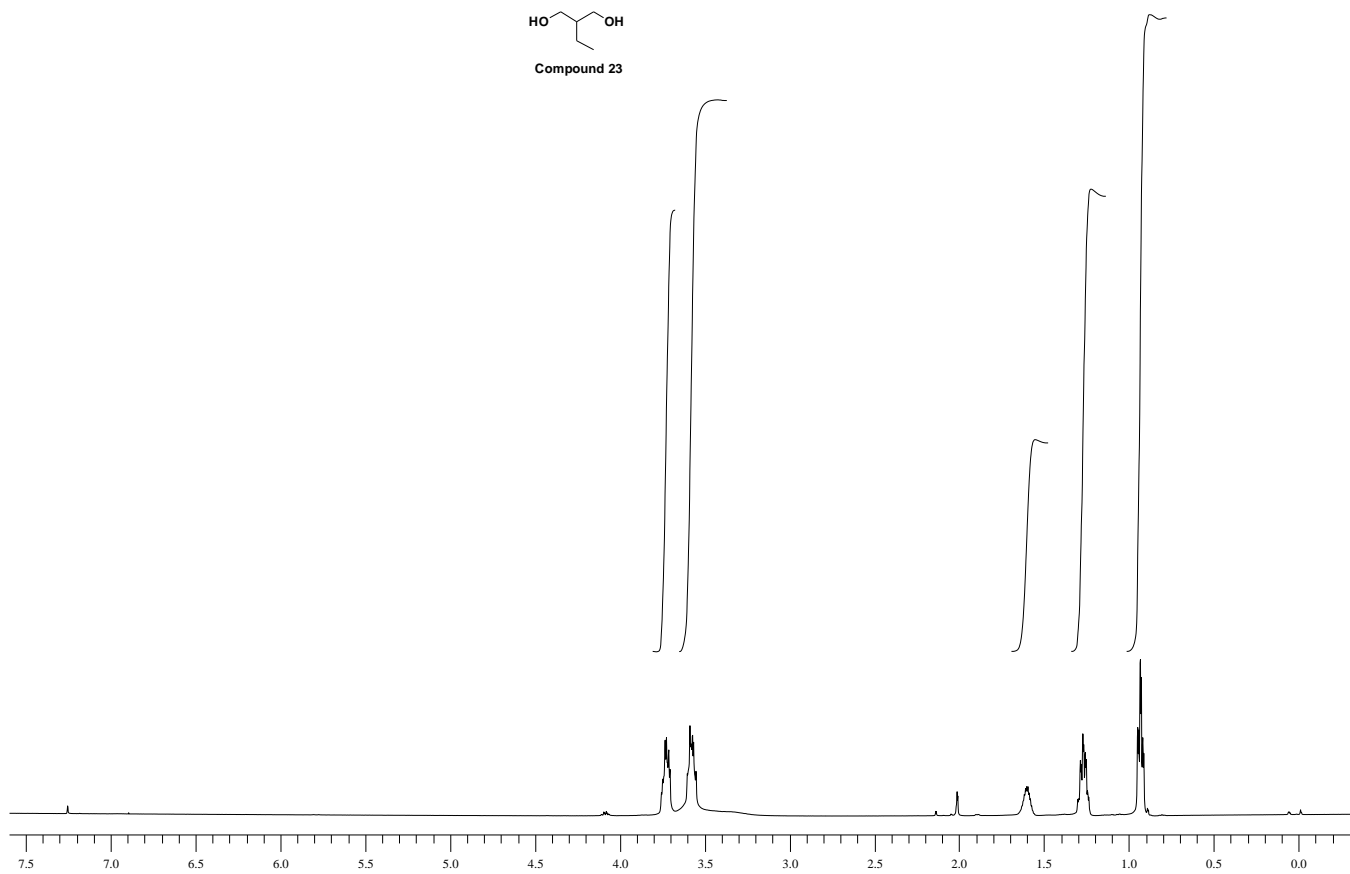

# <sup>1</sup>H NMR spectrum of Compound 24

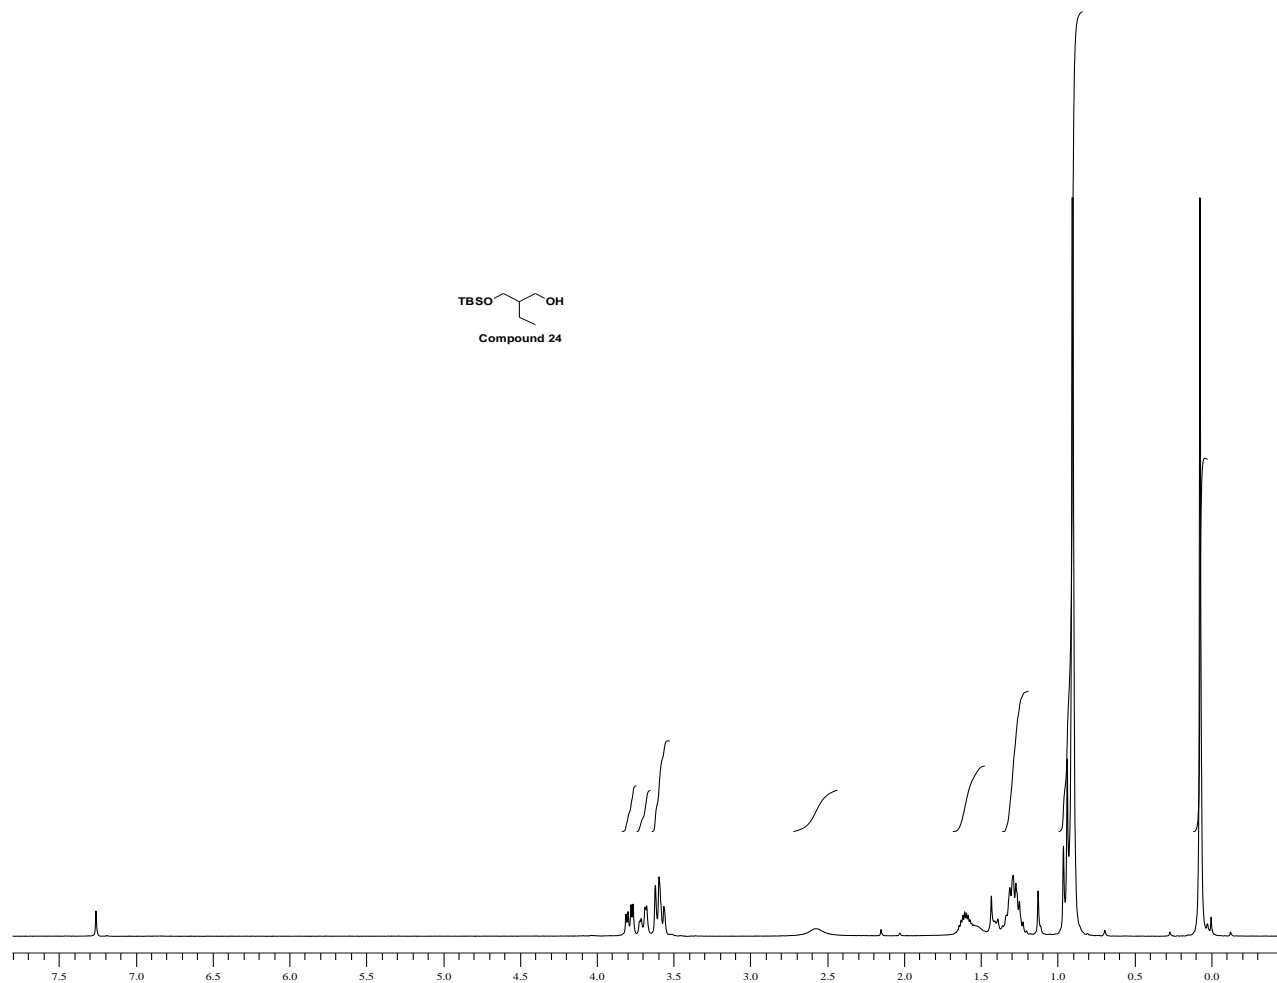

## <sup>13</sup>C NMR spectrum of Compound 24

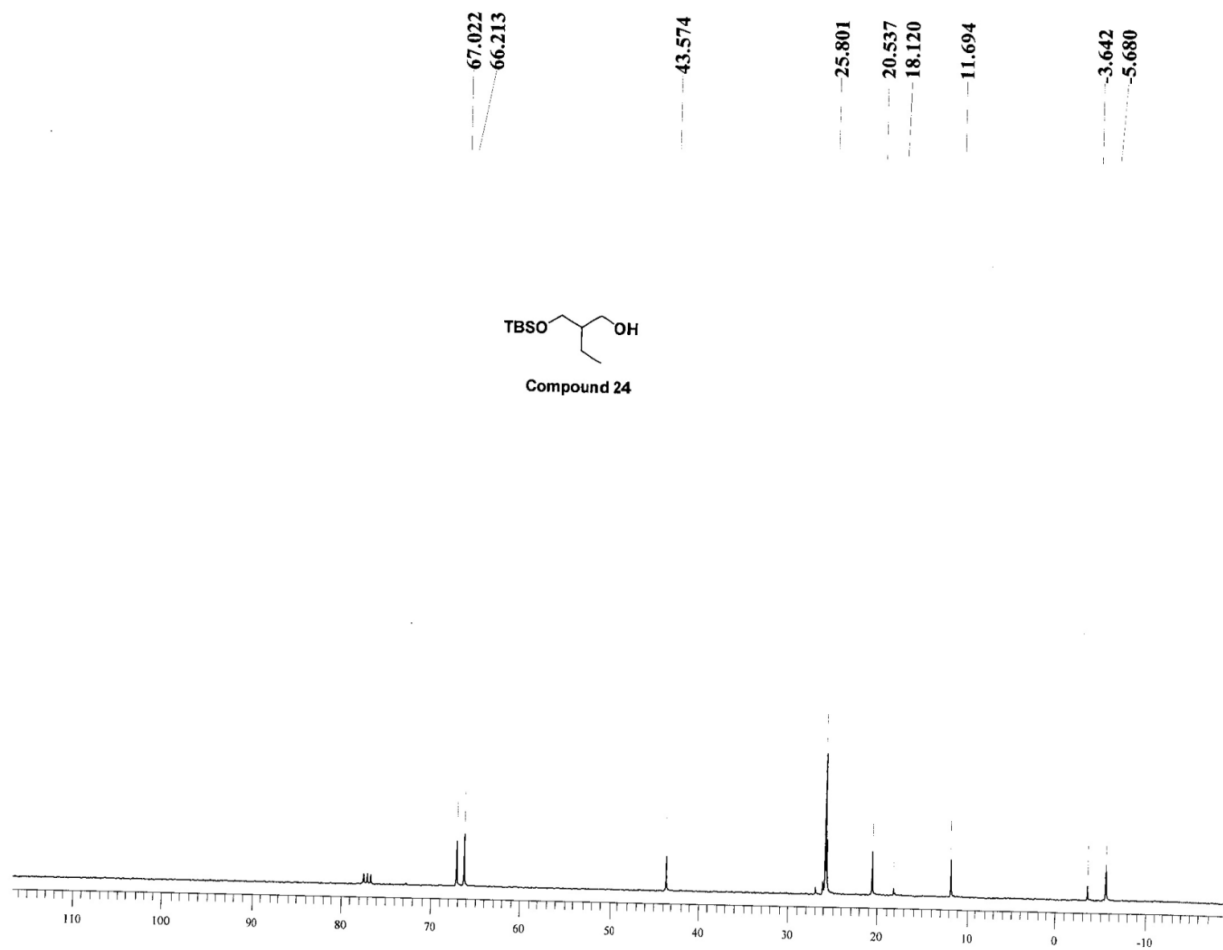

# <sup>1</sup>H NMR spectrum of Compound 26

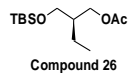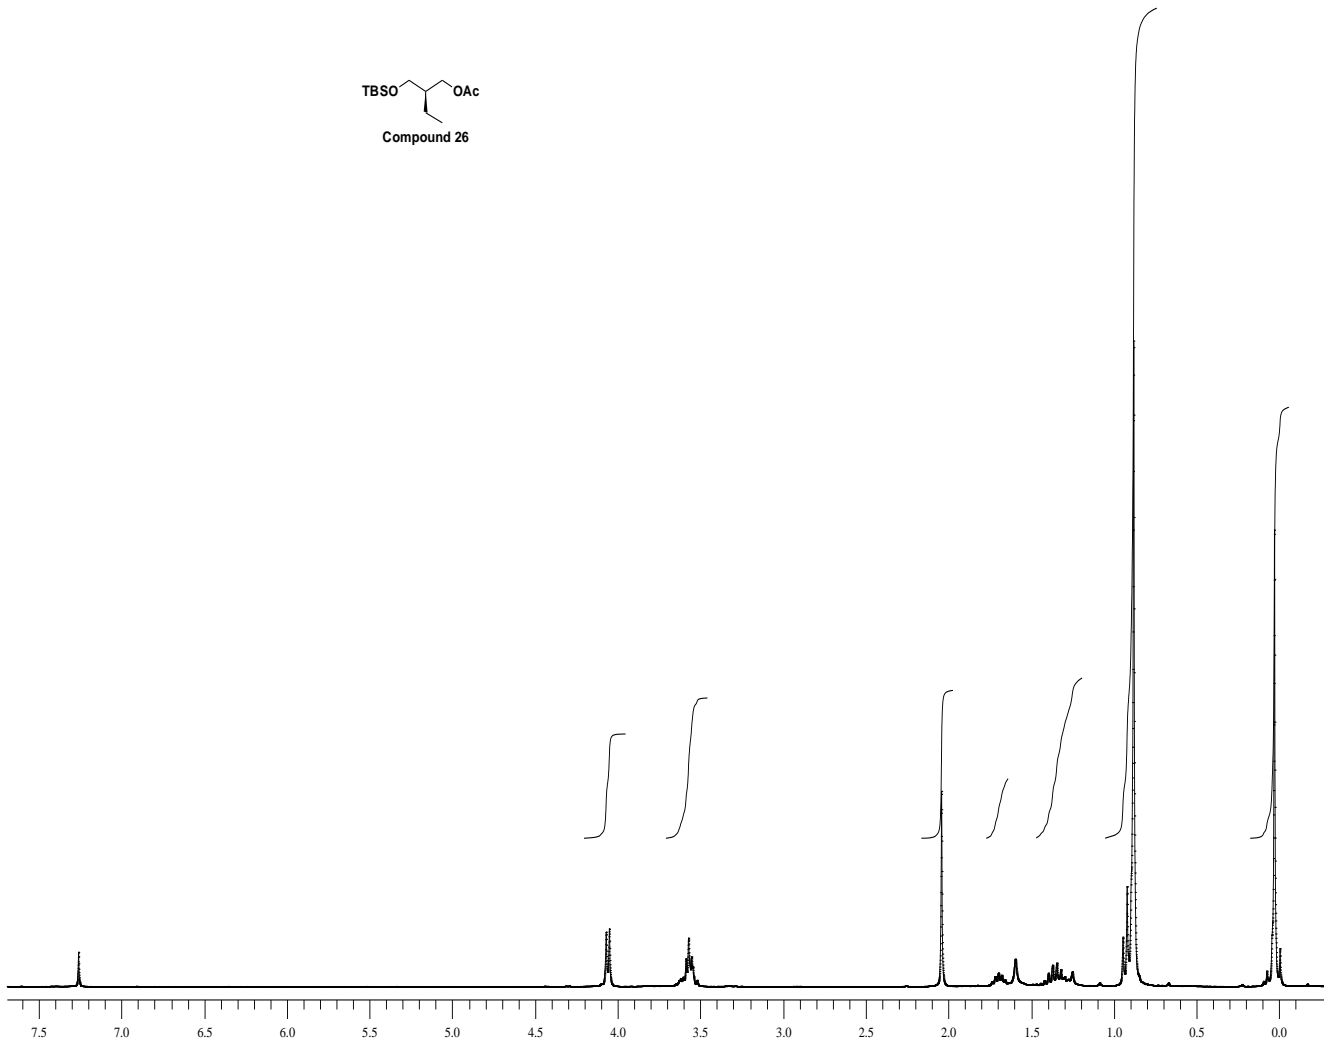



# <sup>13</sup>C NMR spectrum of Compound 26

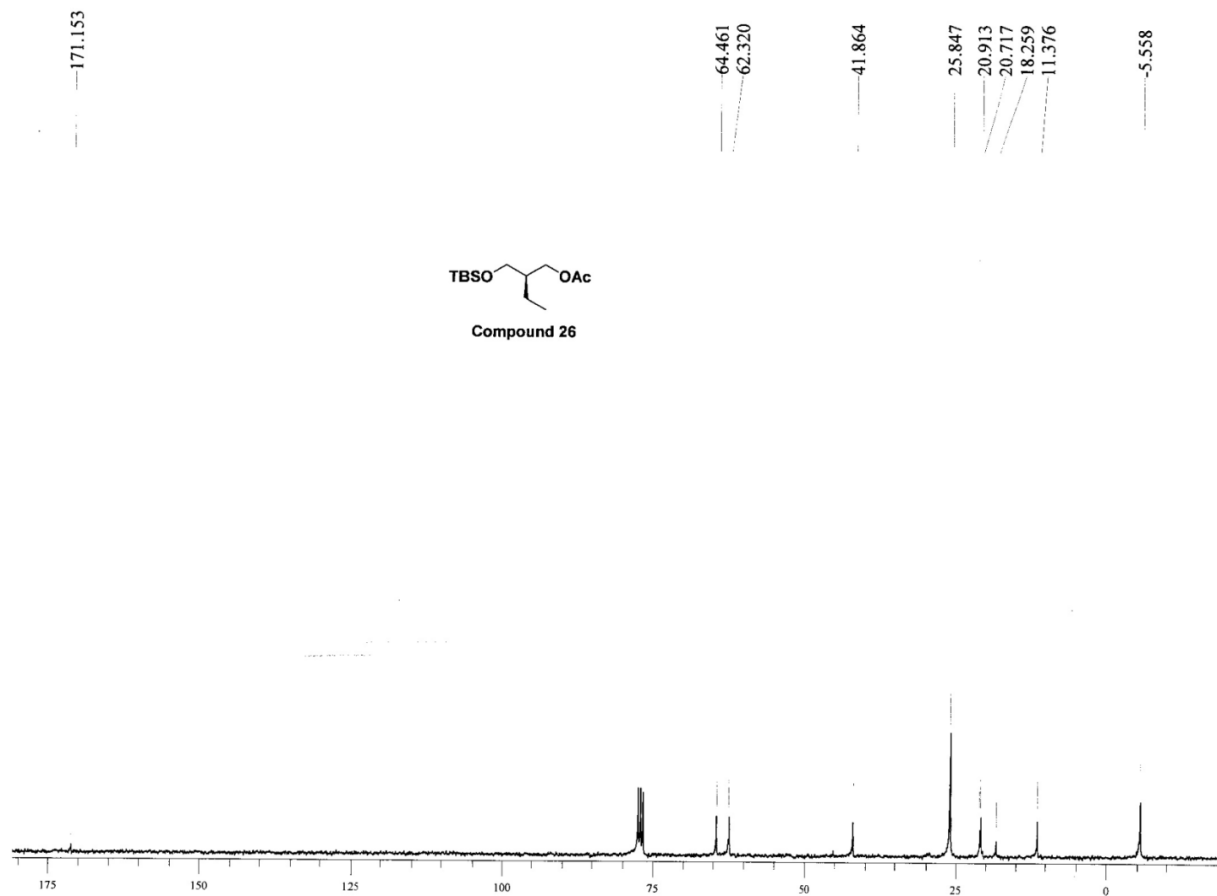

# <sup>1</sup>H NMR spectrum of Compound 27

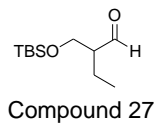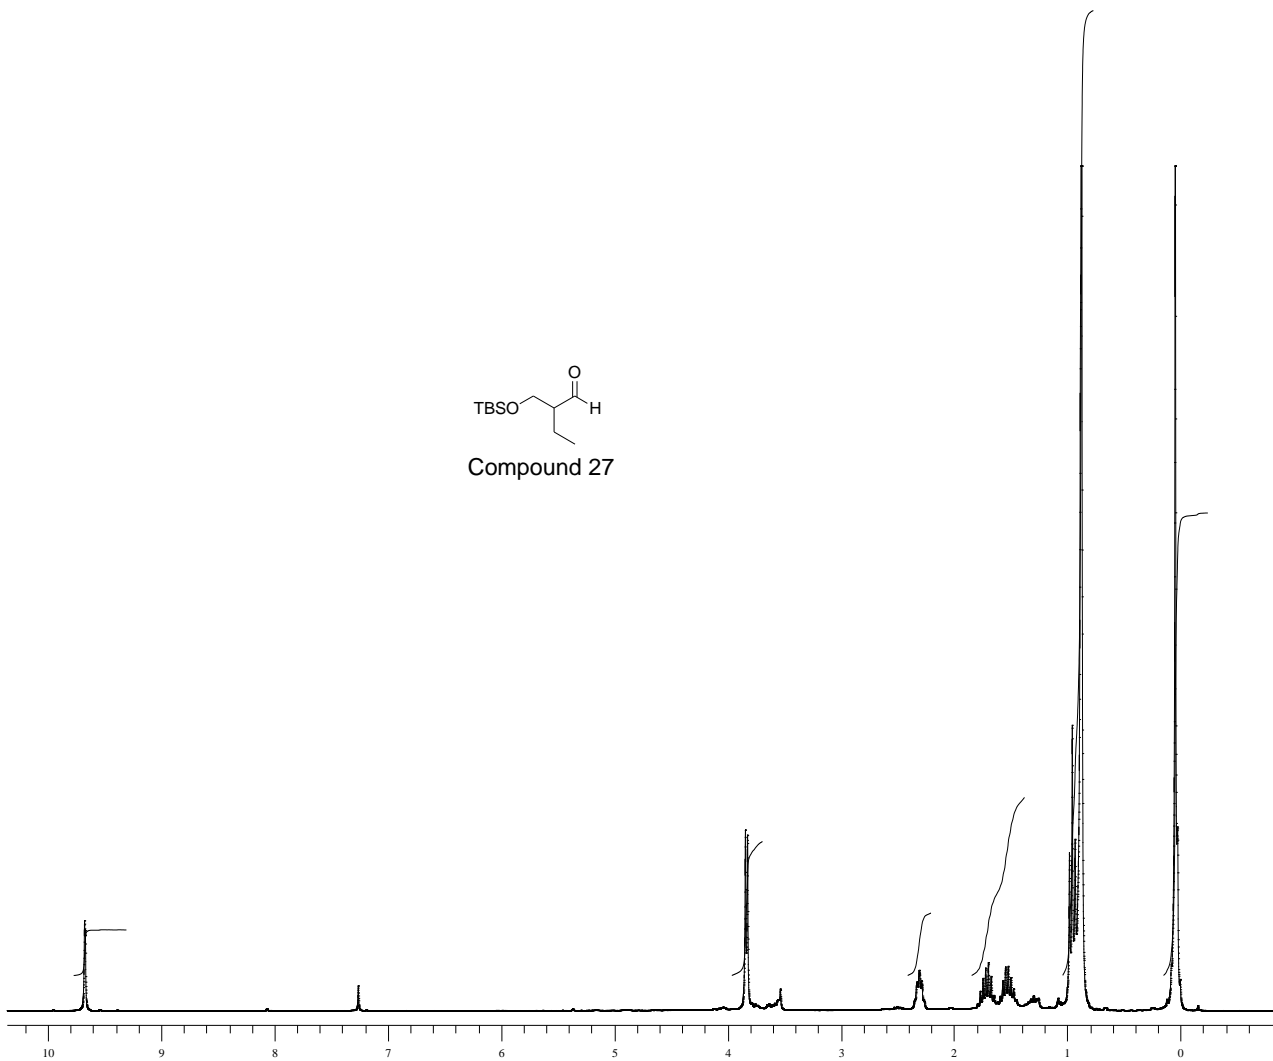

# <sup>13</sup>C NMR spectrum of Compound 27

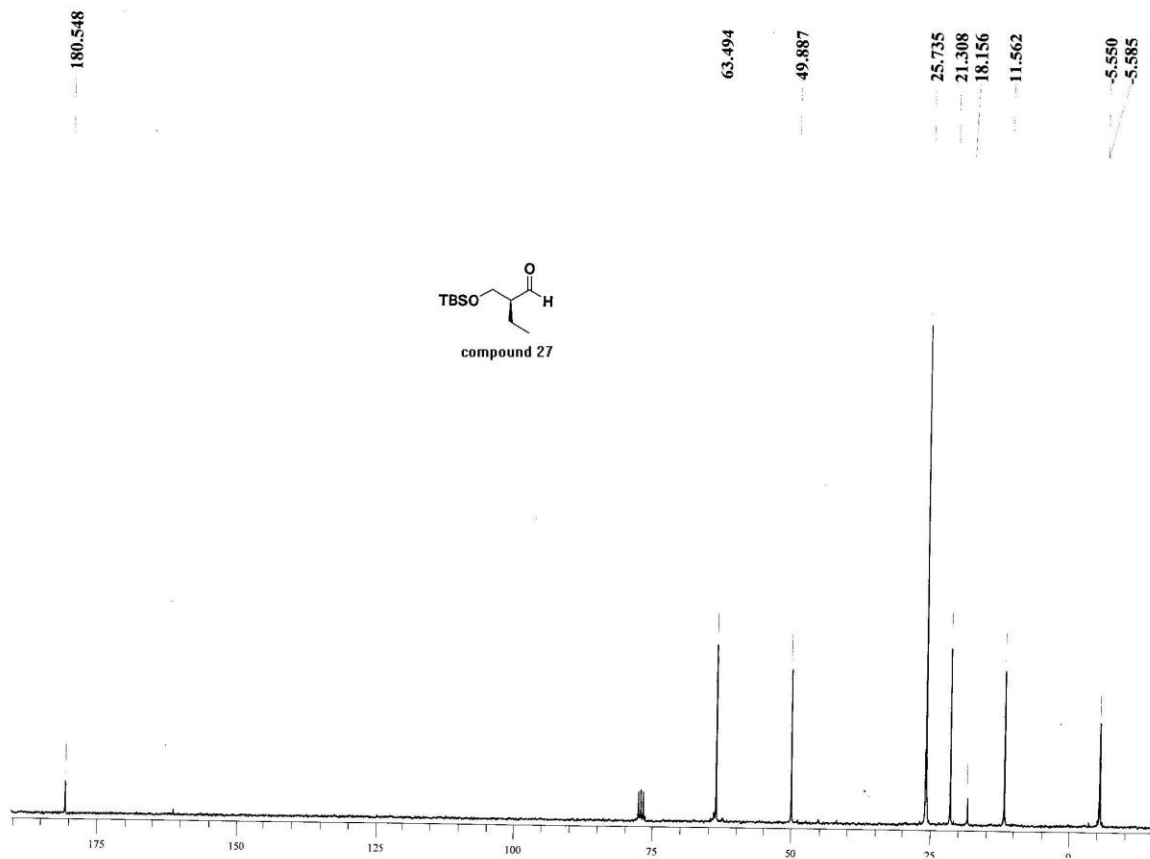

## $^1\text{H}$ NMR spectrum of Compound 19

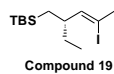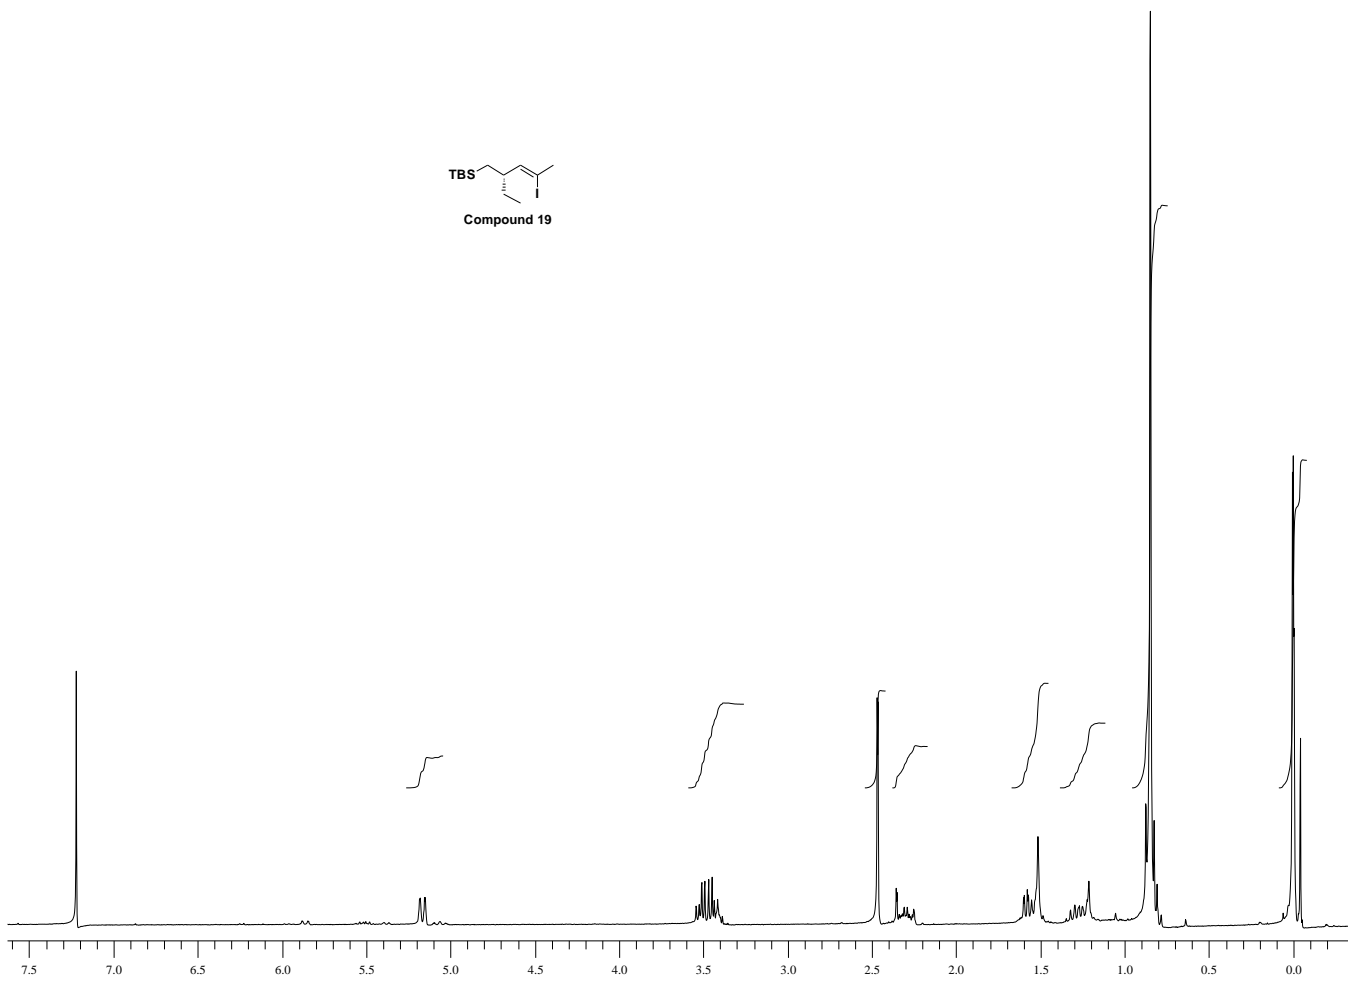

# <sup>13</sup>C NMR spectrum of Compound 19

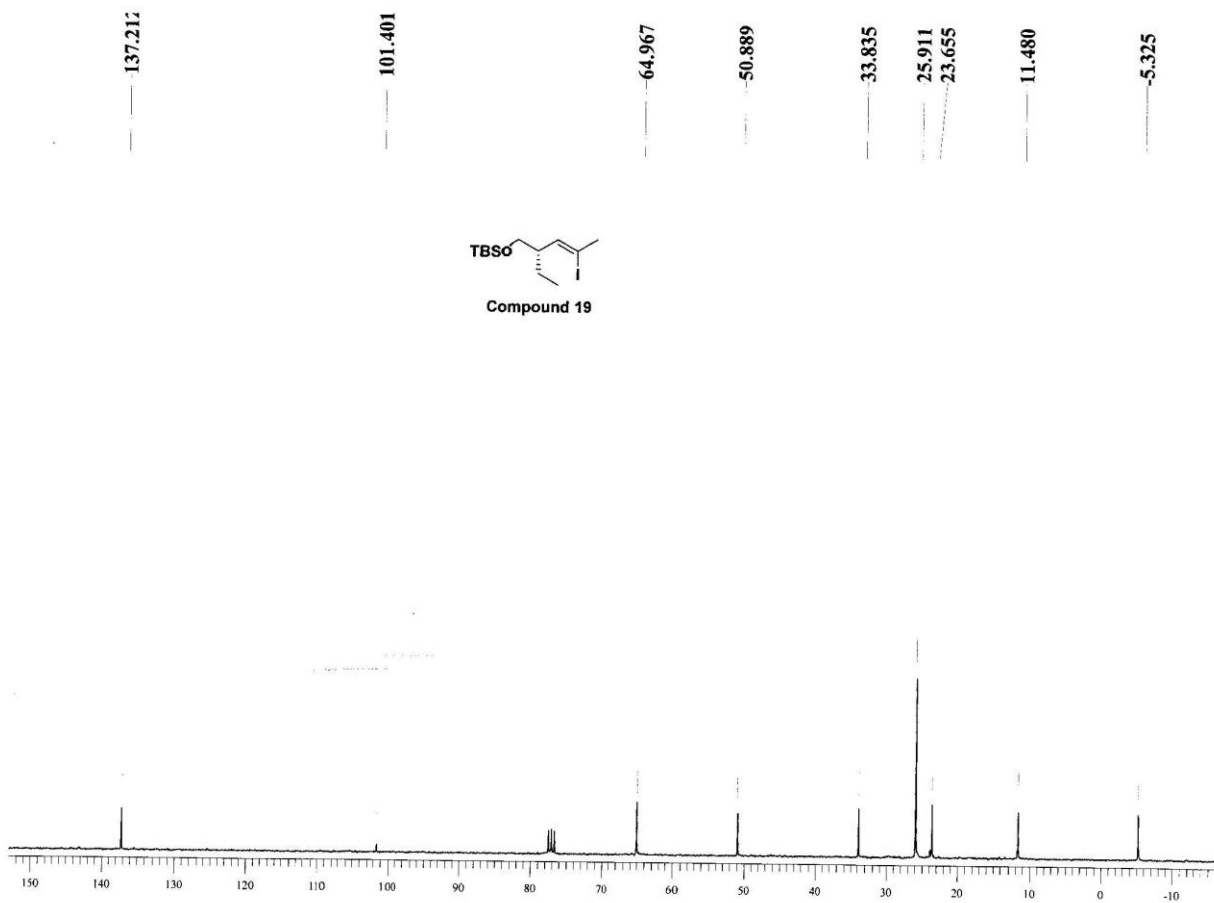

## <sup>1</sup>H NMR spectrum of Compound 30

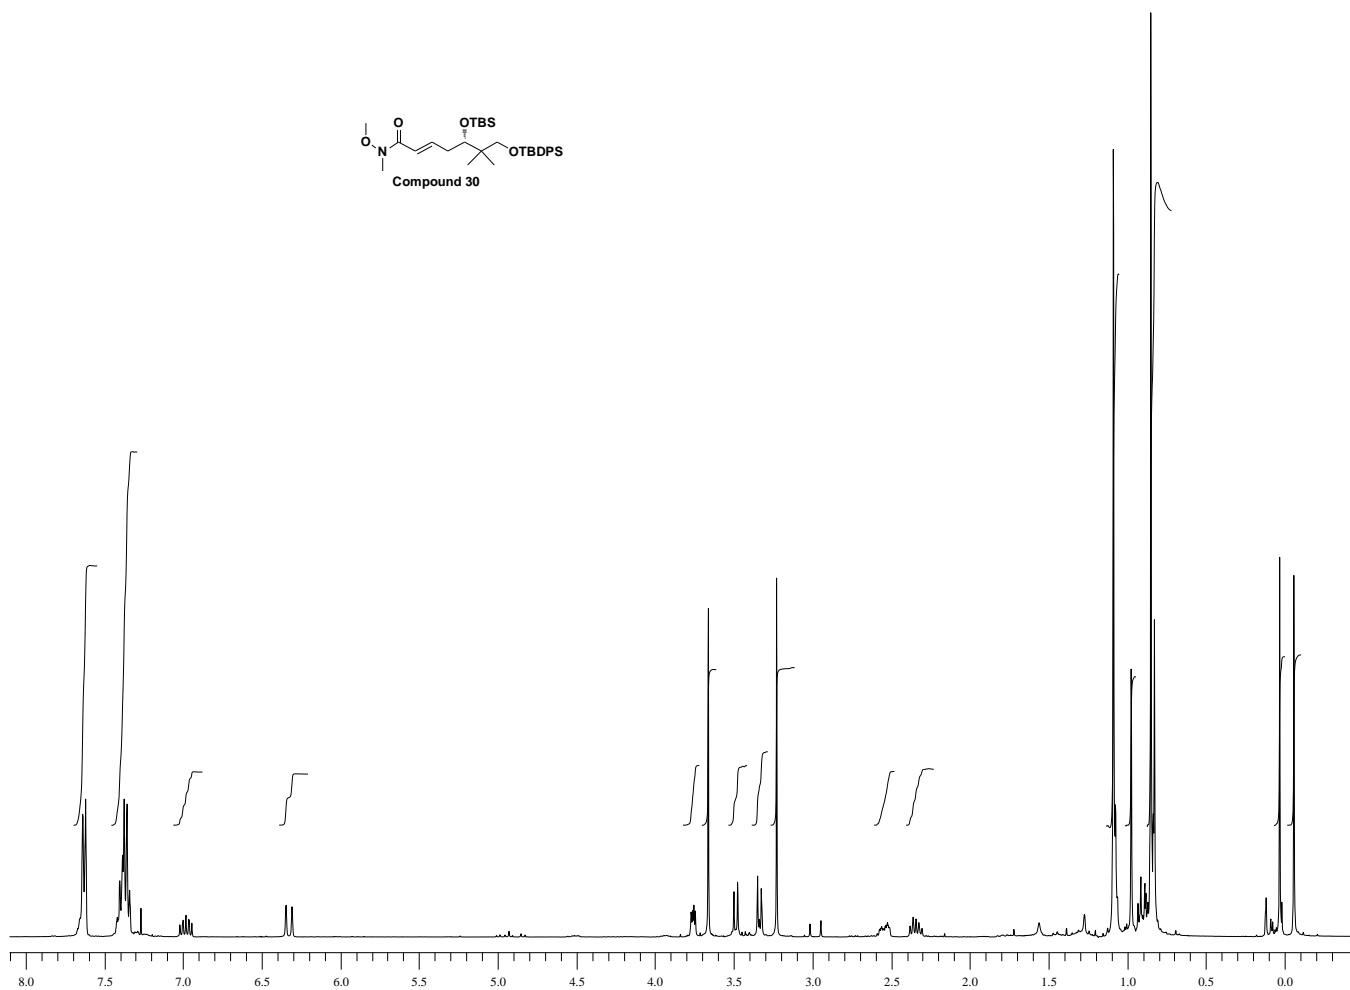

## $^{13}\text{C}$ NMR spectrum of Compound 30

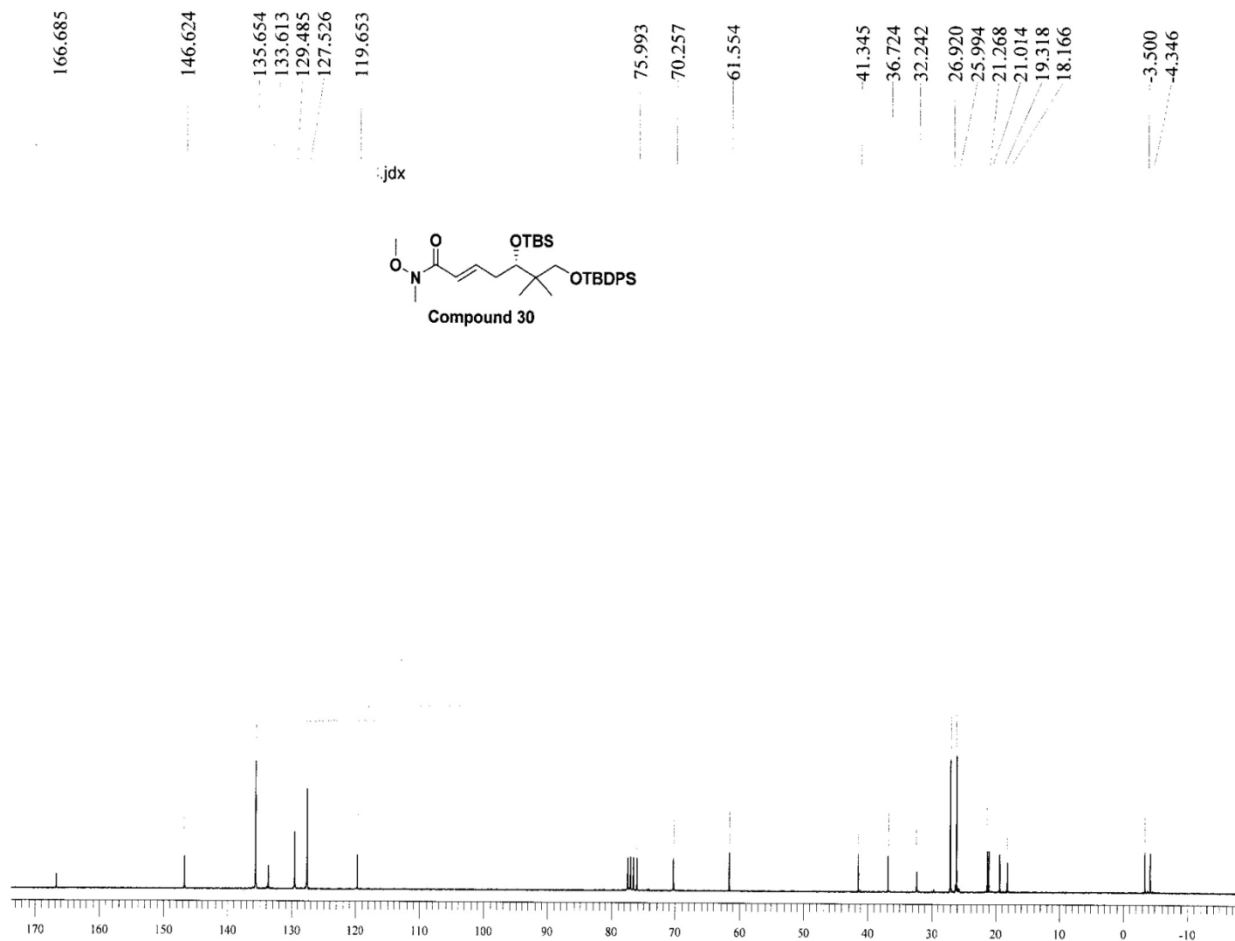

# <sup>1</sup>H NMR spectrum of Compound 33

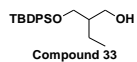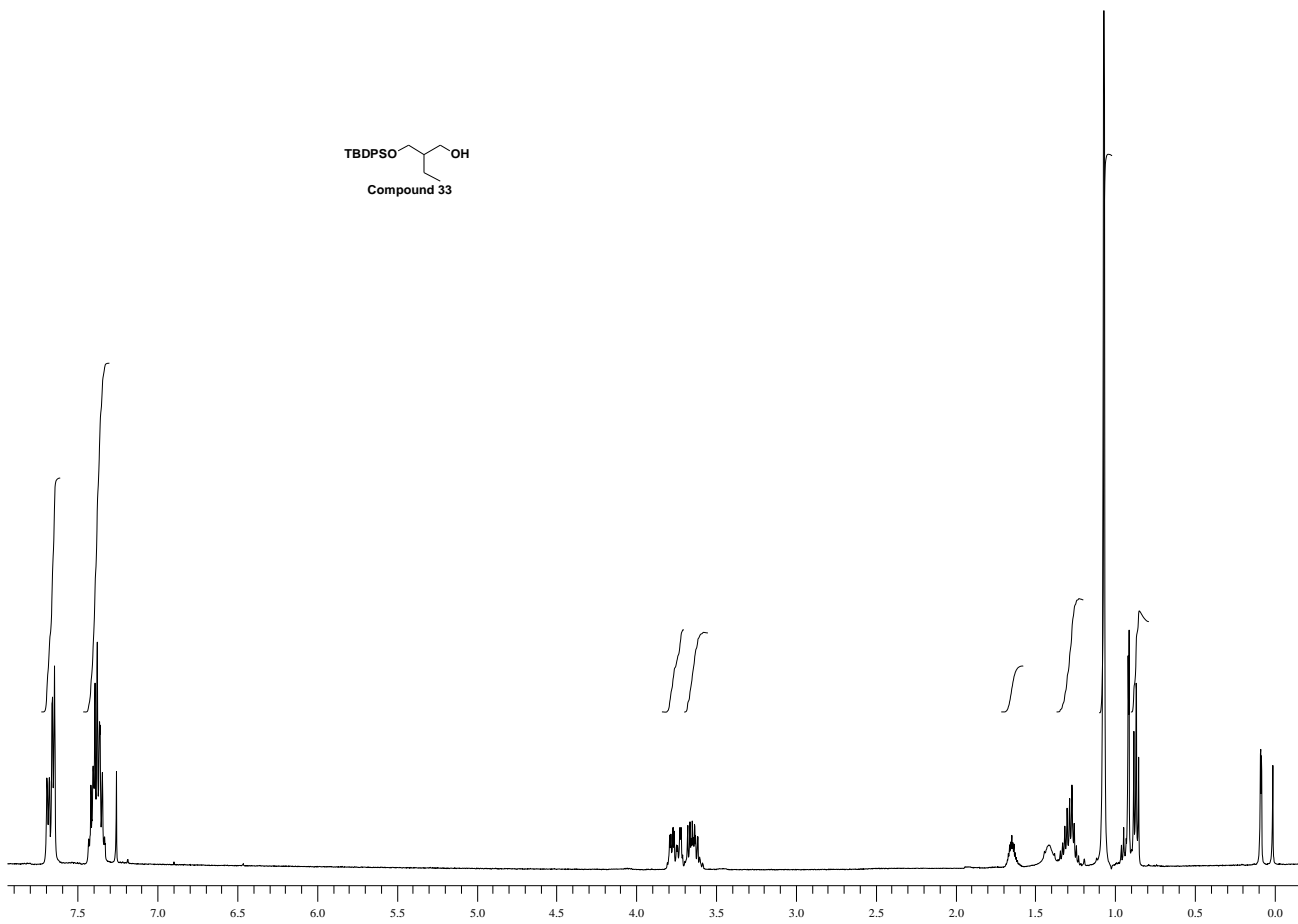



## <sup>13</sup>C NMR spectrum of Compound 33

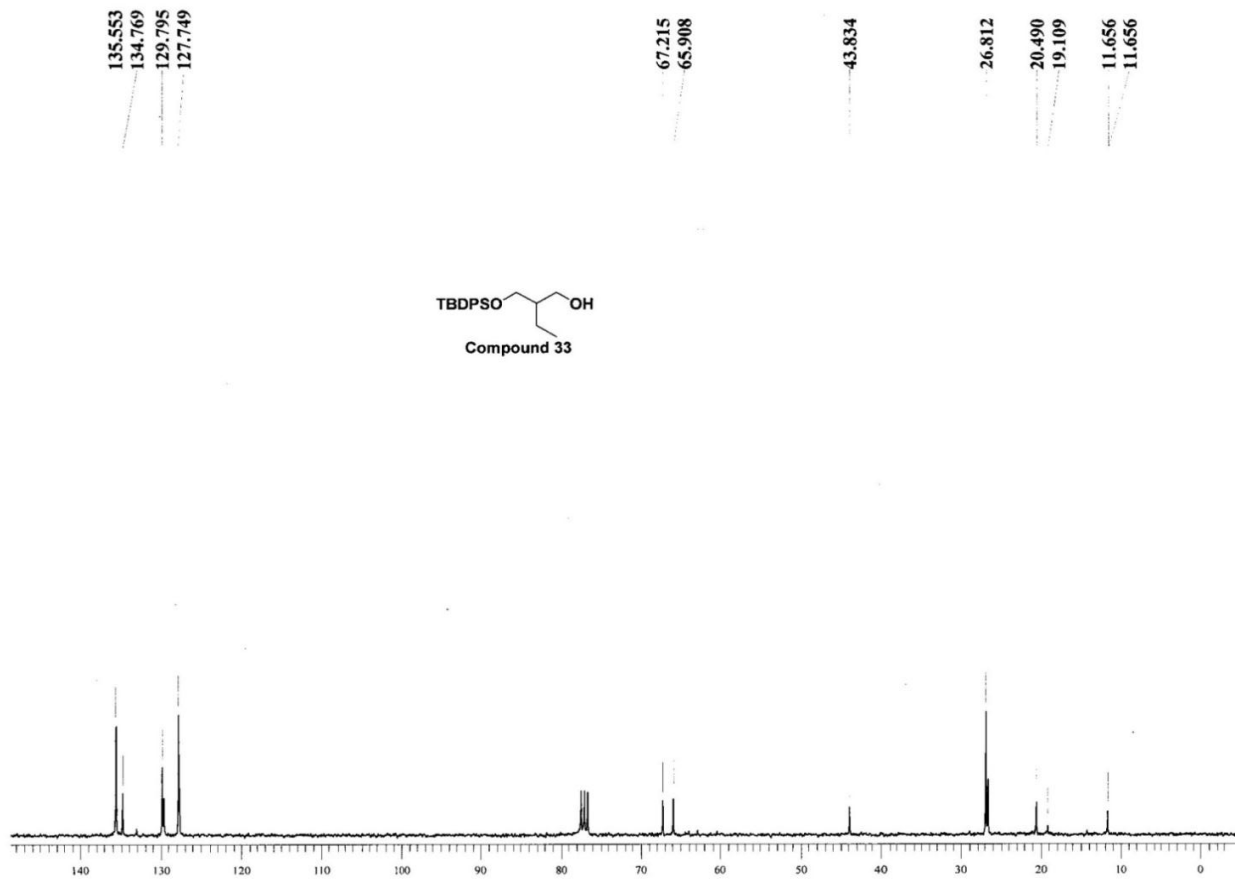

## <sup>1</sup>H NMR spectrum of Acetate of Compound 33

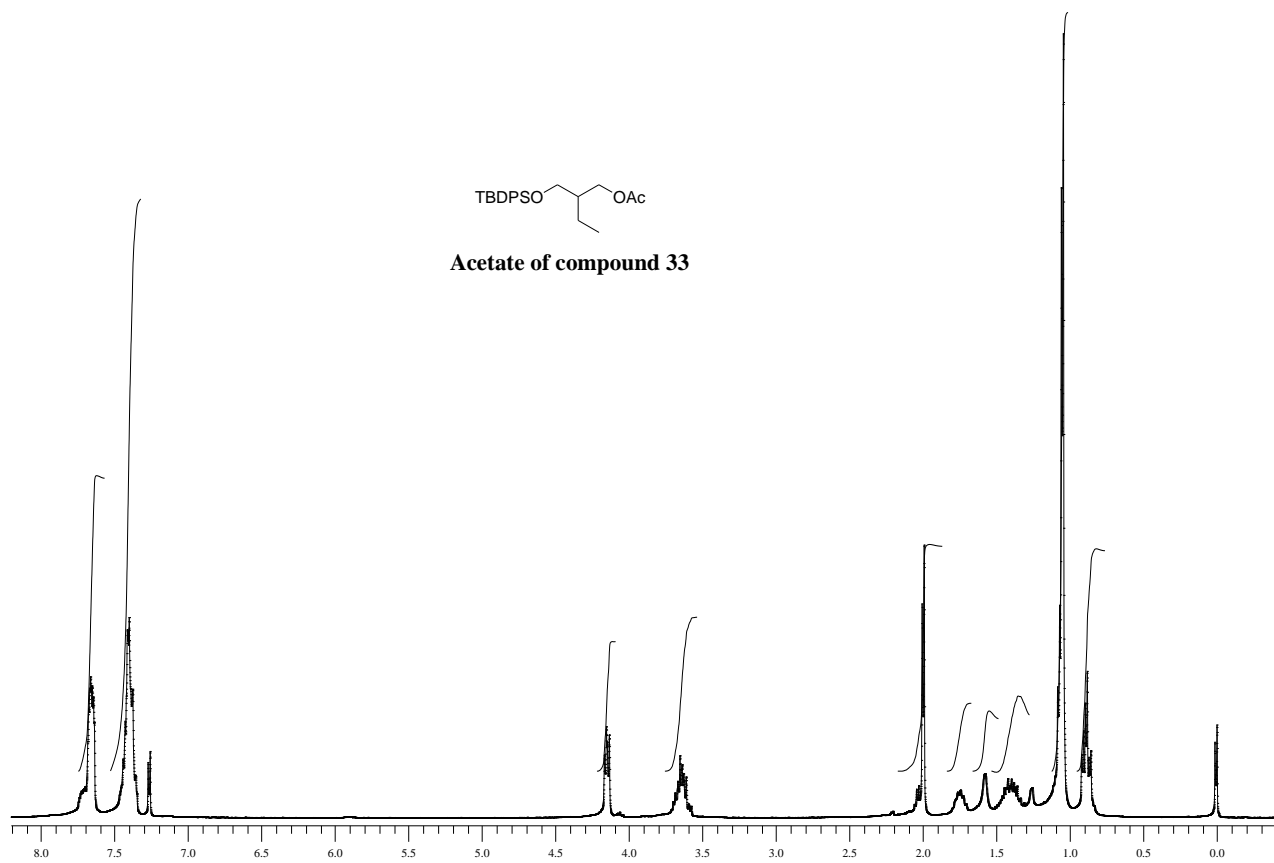

## HPLC of Racemic compound of Acetate of 33

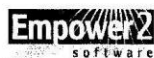

## Injection Summary Report

| SAMPLE INFORMATION |                          |                     |              |
|--------------------|--------------------------|---------------------|--------------|
| Sample Name:       | Rac OAc 1% Ietoh hep     | Acquired By:        | System       |
| Sample Type:       | Standard                 | Sample Set Name:    |              |
| Vial:              | 1                        | Acq. Method Set:    | VV 1% IPA    |
| Injection #:       | 1                        | Processing Method:  | chiral       |
| Injection Volume:  | 10.00 ul                 | Channel Name:       | 254.0nm      |
| Run Time:          | 29.0 Minutes             | Proc. Chnl. Descr.: | PDA 254.0 nm |
| Date Acquired:     | 8/31/2011 11:01:58 AMIST |                     |              |
| Date Processed:    | 8/31/2011 11:14:09 AMIST |                     |              |

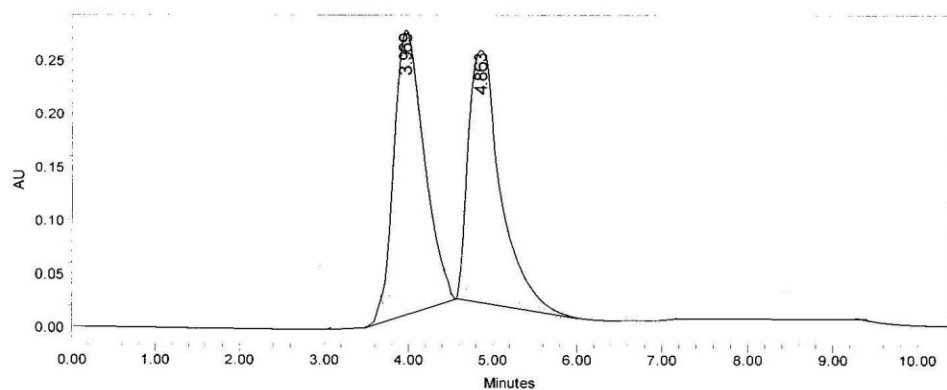

Channel: 2998; Processed Channel: PDA 254.0 nm; Result Id: 7019; Processing Method: chiral

### Processed Channel Descr.: PDA 254.0 nm

|   | Processed Channel Descr. | RT    | Area    | % Area | Height |
|---|--------------------------|-------|---------|--------|--------|
| 1 | PDA 254.0 nm             | 3.969 | 5774325 | 49.79  | 247590 |
| 2 | PDA 254.0 nm             | 4.863 | 5822600 | 50.21  | 227809 |

Reported by User: System  
Report Method: Injection Summary Report  
Report Method ID: 1005  
Page: 1 of 1

Project Name: APRIL 2009  
Date Printed: 6/11/2012  
8:32:13 PM Asia/Calcutta

## HPLC of Acetate of compound 33

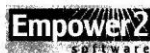

## Injection Summary Report

### SAMPLE INFORMATION

|                   |                          |                     |              |
|-------------------|--------------------------|---------------------|--------------|
| Sample Name:      | Chi OAc 1% I etoh hep    | Acquired By:        | System       |
| Sample Type:      | Standard                 | Sample Set Name:    |              |
| Vial:             | 1                        | Acq. Method Set:    | VV 1% IPA    |
| Injection #:      | 2                        | Processing Method:  | chiral       |
| Injection Volume: | 10.00 ul                 | Channel Name:       | 254.0nm      |
| Run Time:         | 29.0 Minutes             | Proc. Chnl. Descr.: | PDA 254.0 nm |
| Date Acquired:    | 8/31/2011 11:13:21 AMIST |                     |              |
| Date Processed:   | 8/31/2011 11:20:34 AMIST |                     |              |

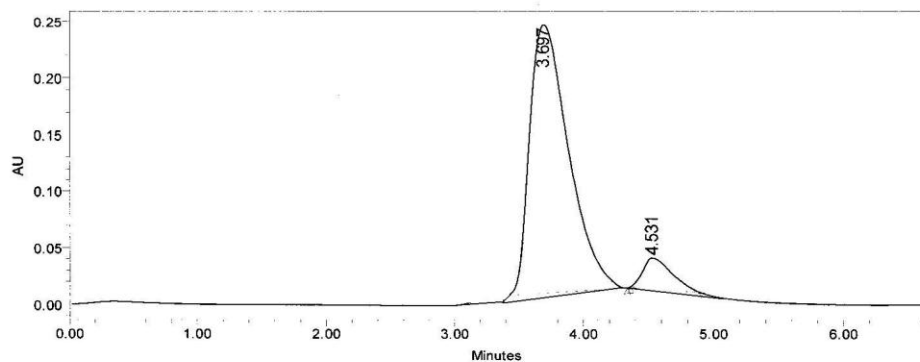

Channel: 2998; Processed Channel: PDA 254.0 nm; Result Id: 7021; Processing Method: chiral

#### Processed Channel Descr.: PDA 254.0 nm

|   | Processed Channel Descr. | RT    | Area    | % Area | Height |
|---|--------------------------|-------|---------|--------|--------|
| 1 | PDA 254.0 nm             | 3.697 | 4943058 | 92.54  | 236227 |
| 2 | PDA 254.0 nm             | 4.531 | 398419  | 7.46   | 26538  |

Reported by User: System  
Report Method: Injection Summary Report  
Report Method ID: 1005  
Page: 1 of 1

Project Name: APRIL 2009  
Date Printed: 6/11/2012  
8:33:07 PM Asia/Calcutta

## HPLC of Acetate of compound *epi-33*

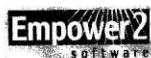

## Injection Summary Report

| SAMPLE INFORMATION |                           |                     |              |
|--------------------|---------------------------|---------------------|--------------|
| Sample Name:       | VV-Ace-OH                 | Acquired By:        | System       |
| Sample Type:       | Standard                  | Sample Set Name:    |              |
| Vial:              | 1                         | Acq. Method Set:    | VV 1% IPA    |
| Injection #:       | 5                         | Processing Method:  | chiral       |
| Injection Volume:  | 20.00 ul                  | Channel Name:       | 254.0nm      |
| Run Time:          | 40.0 Minutes              | Proc. Chnl. Descr.: | PDA 254.0 nm |
| Date Acquired:     | 11/21/2012 7:47:57 PM IST |                     |              |
| Date Processed:    | 11/21/2012 8:15:08 PM IST |                     |              |

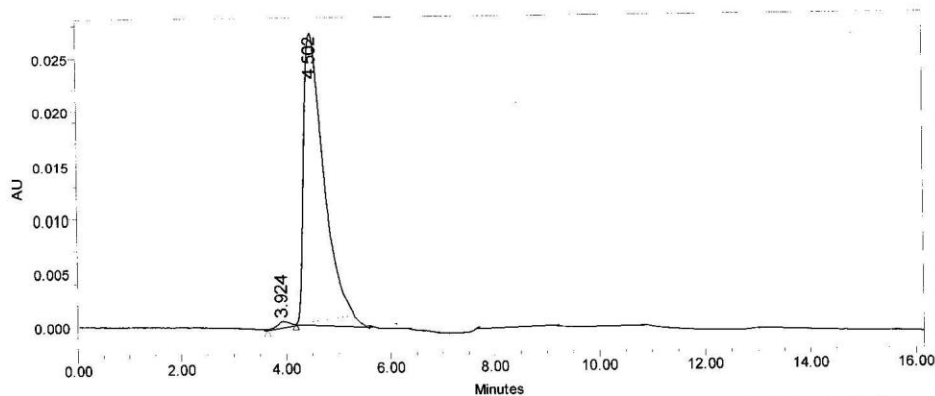

Channel: 2998; Processed Channel: PDA 254.0 nm; Result Id: 9679; Processing Method: chiral

### Processed Channel Descr.: PDA 254.0 nm

|   | Processed Channel Descr. | RT    | Area   | % Area | Height |
|---|--------------------------|-------|--------|--------|--------|
| 1 | PDA 254.0 nm             | 3.924 | 7335   | 1.04   | 544    |
| 2 | PDA 254.0 nm             | 4.502 | 696497 | 98.96  | 26872  |

Reported by User: System  
Report Method: Injection Summary Report  
Report Method ID: 1005  
Page: 1 of 1

Project Name: APRIL 2009  
Date Printed: 11/21/2012  
8:15:34 PM Asia/Calcutta

## $^{13}\text{C}$ NMR spectrum of Acetate of Compound 33

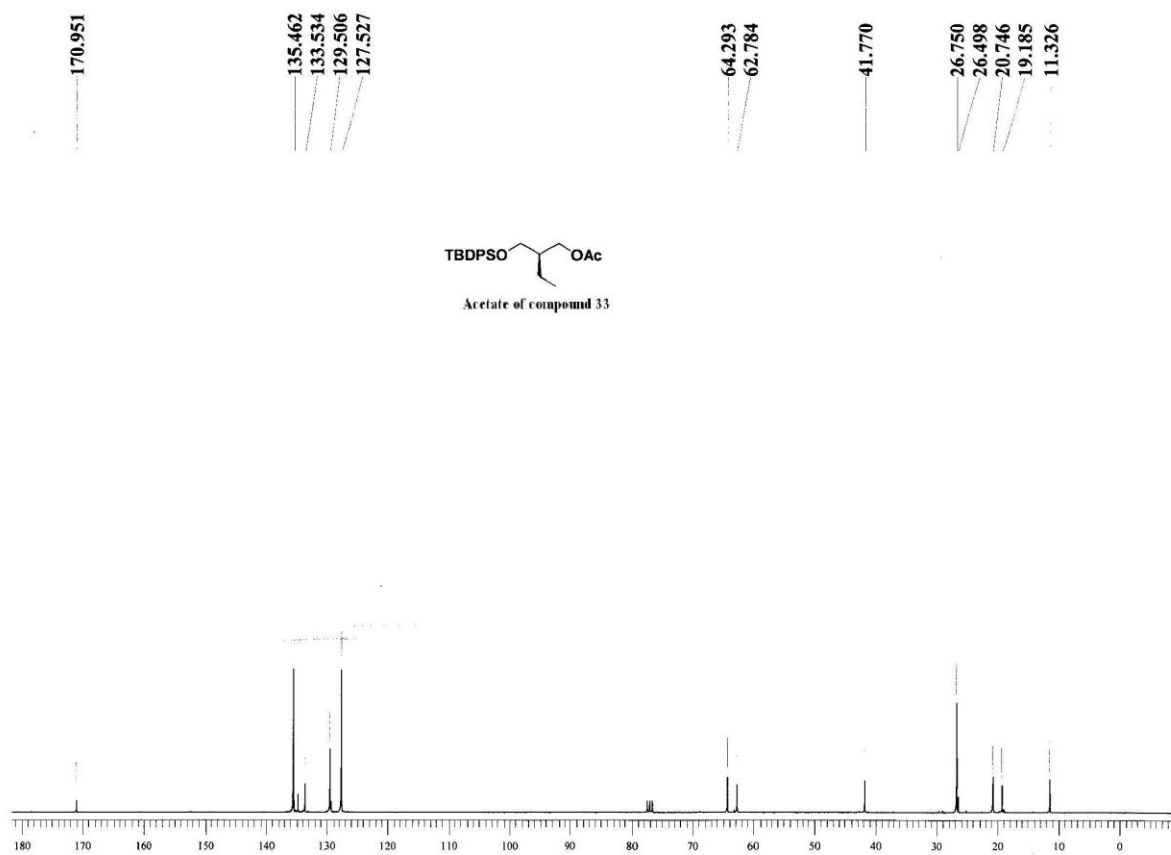

# <sup>1</sup>H NMR spectrum of Compound 34

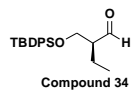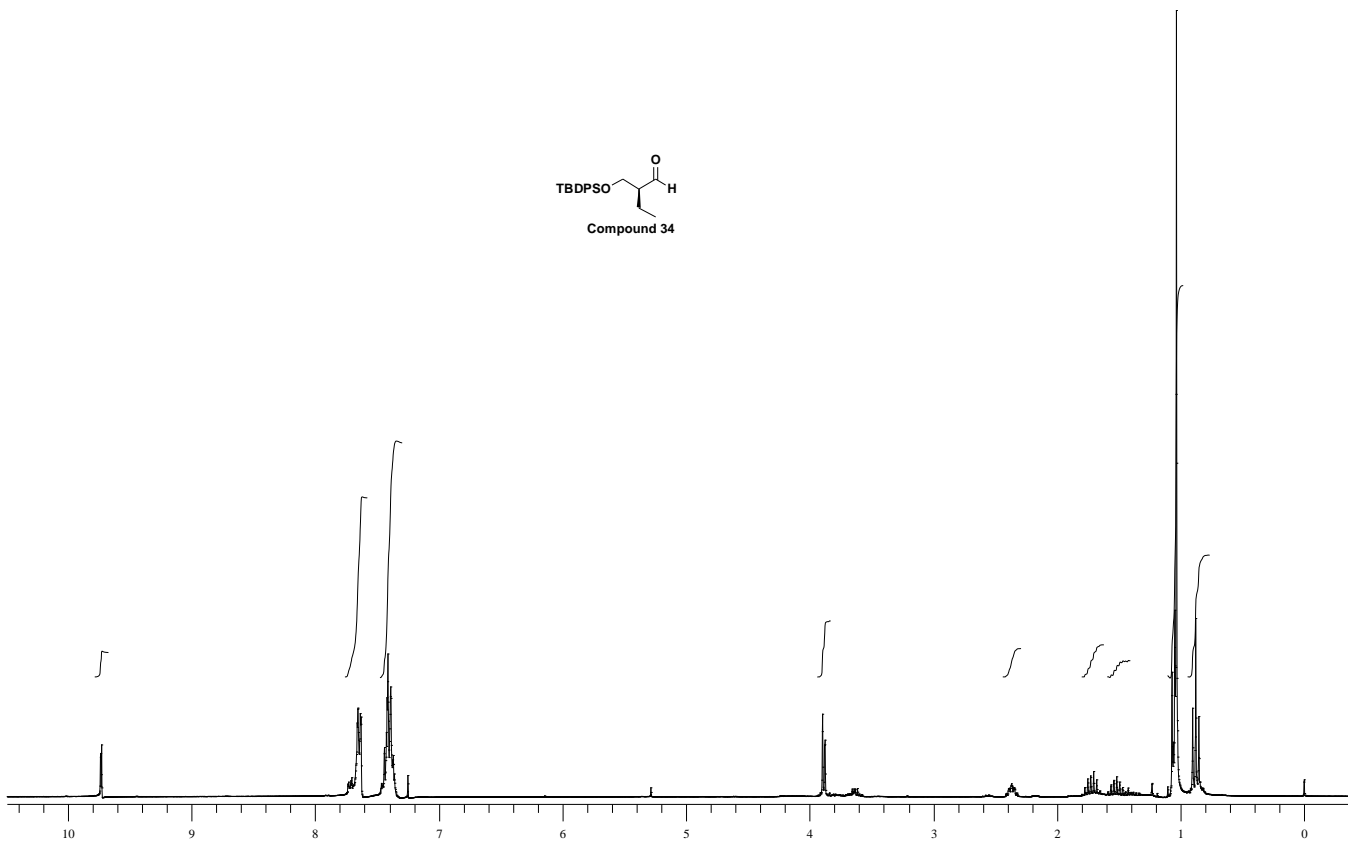

### <sup>13</sup>C NMR spectrum of Compound 34

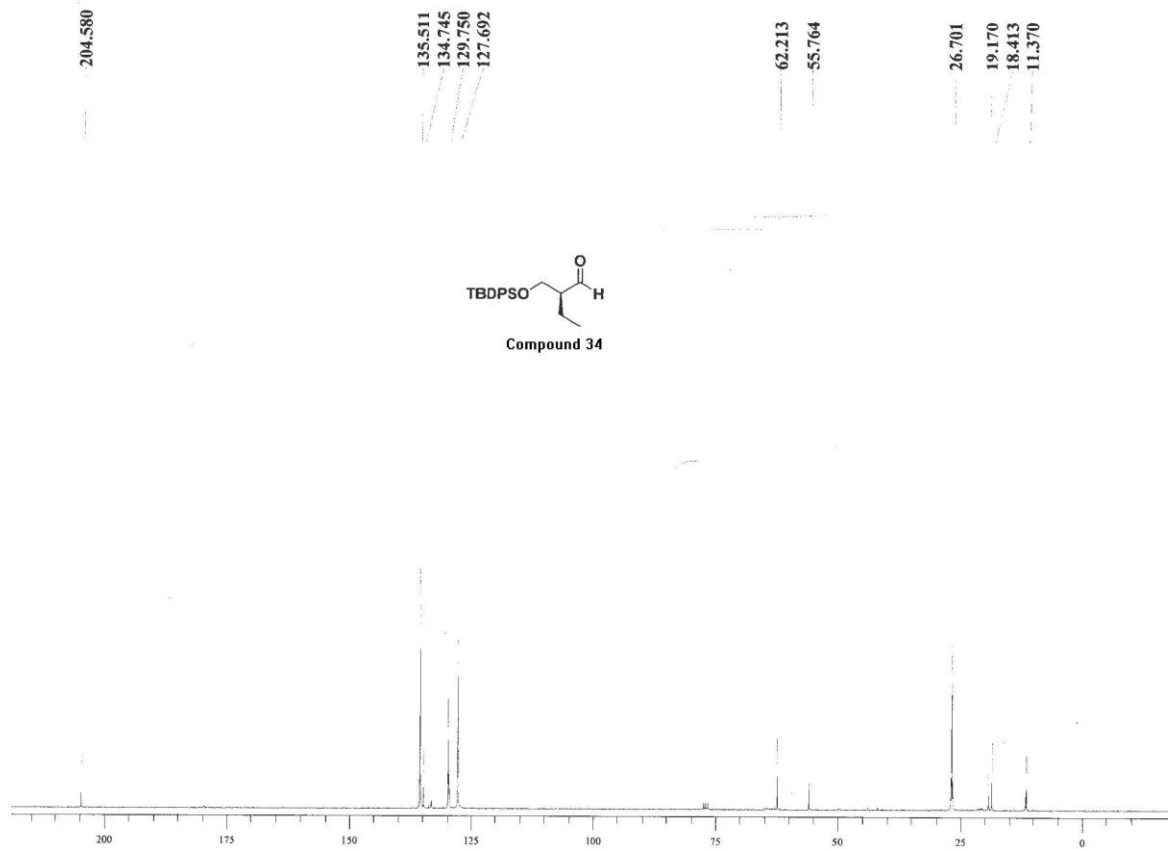



# <sup>1</sup>H NMR spectrum of Compound 35

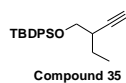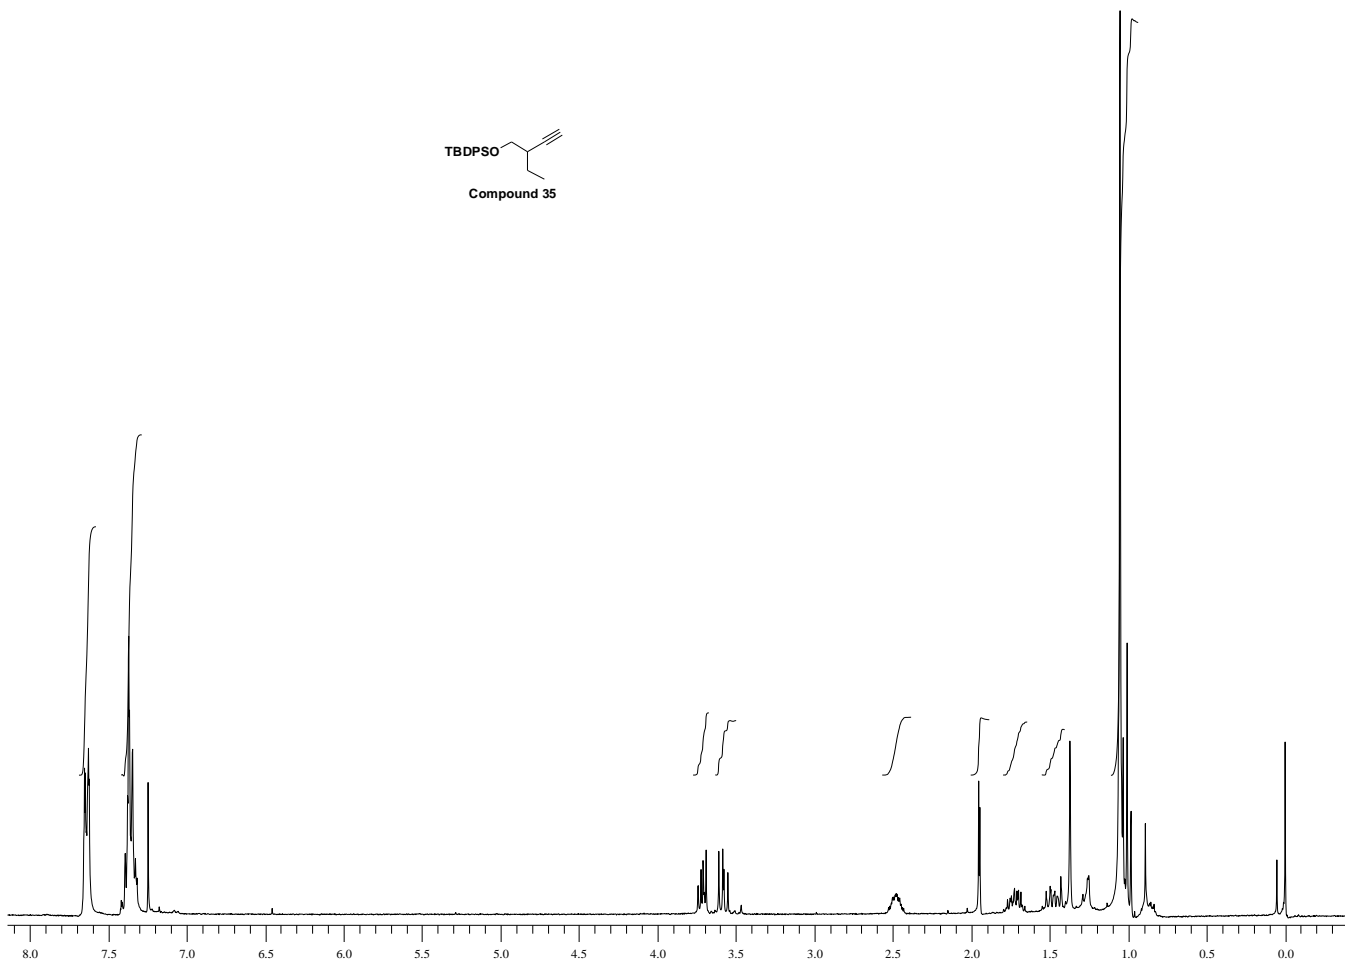

## <sup>13</sup>C NMR spectrum of Compound 35

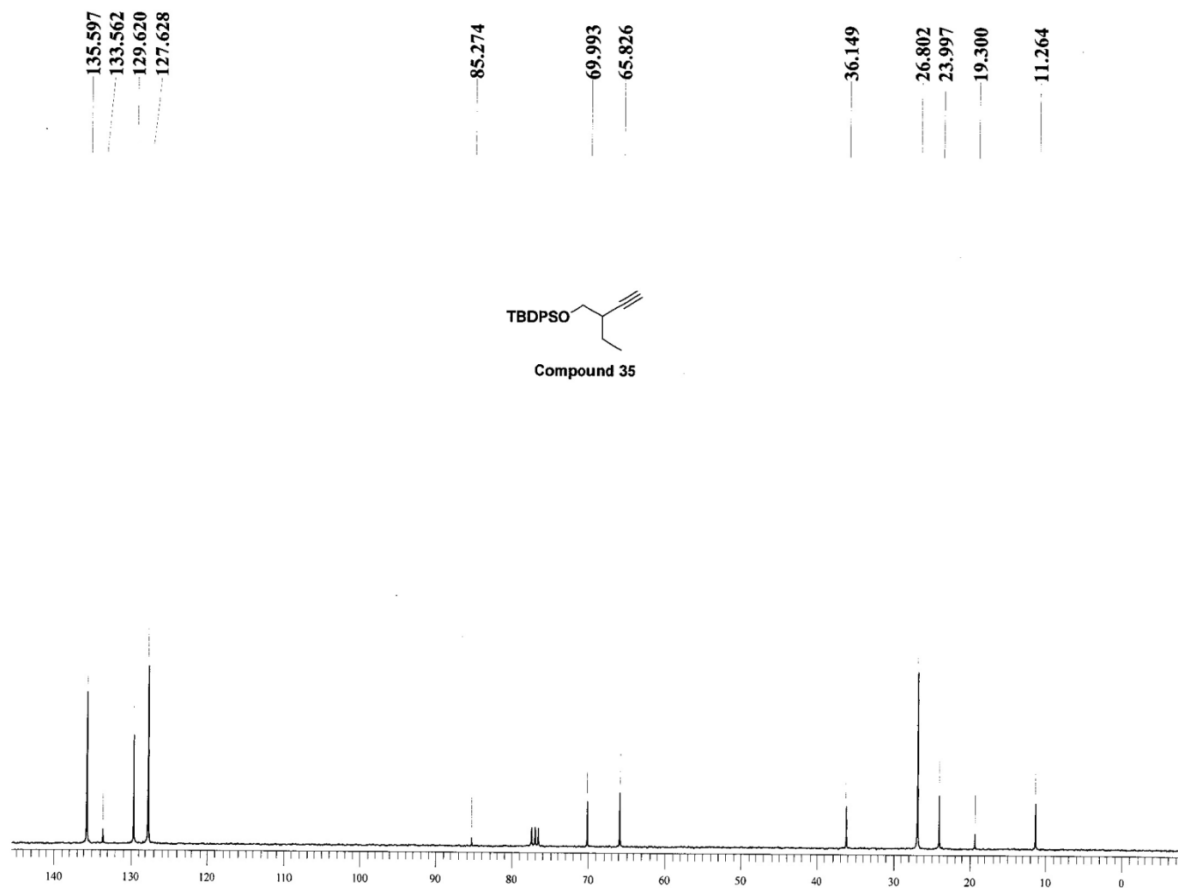

# <sup>1</sup>H NMR spectrum of Compound 36

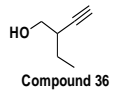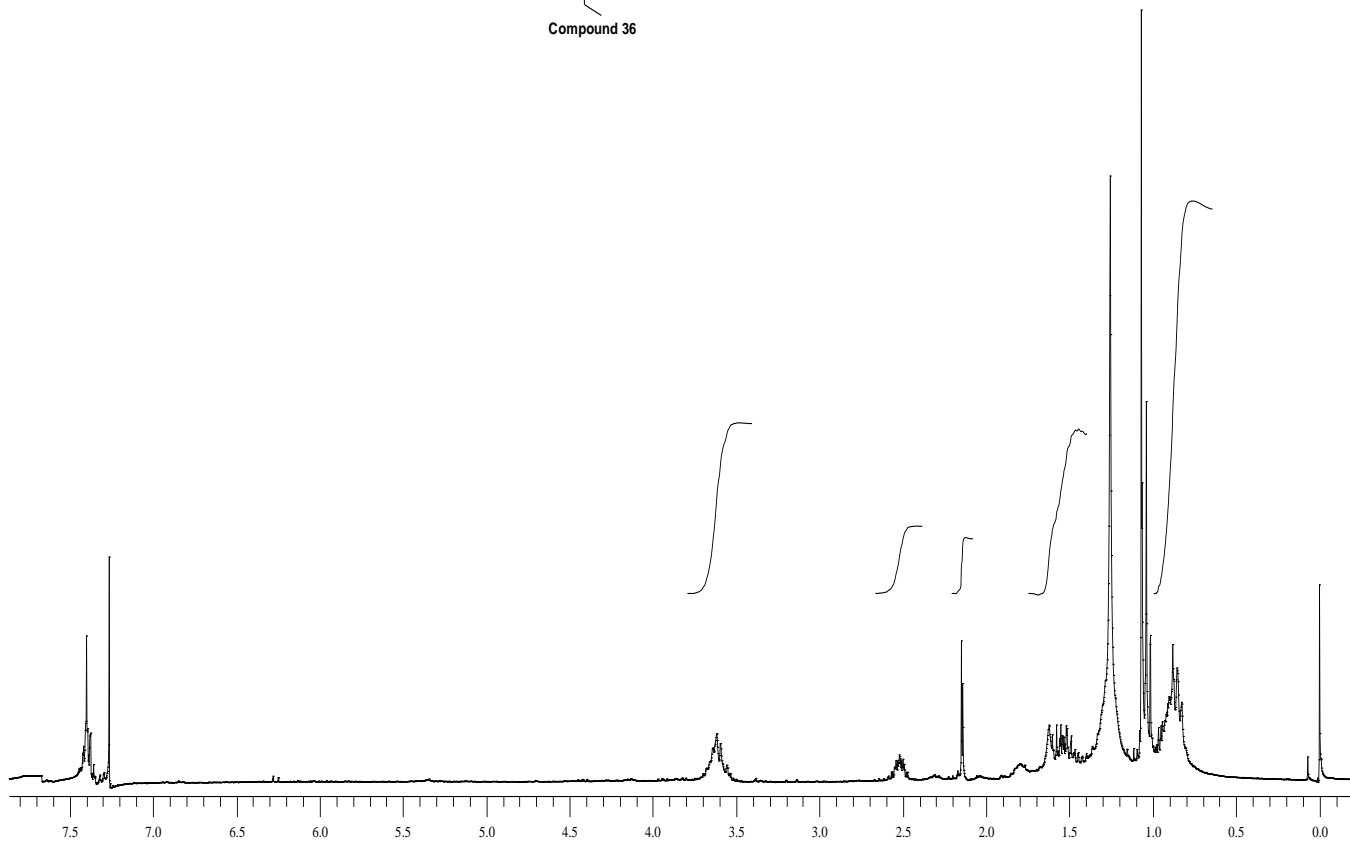

# <sup>13</sup>C NMR spectrum of Compound 36

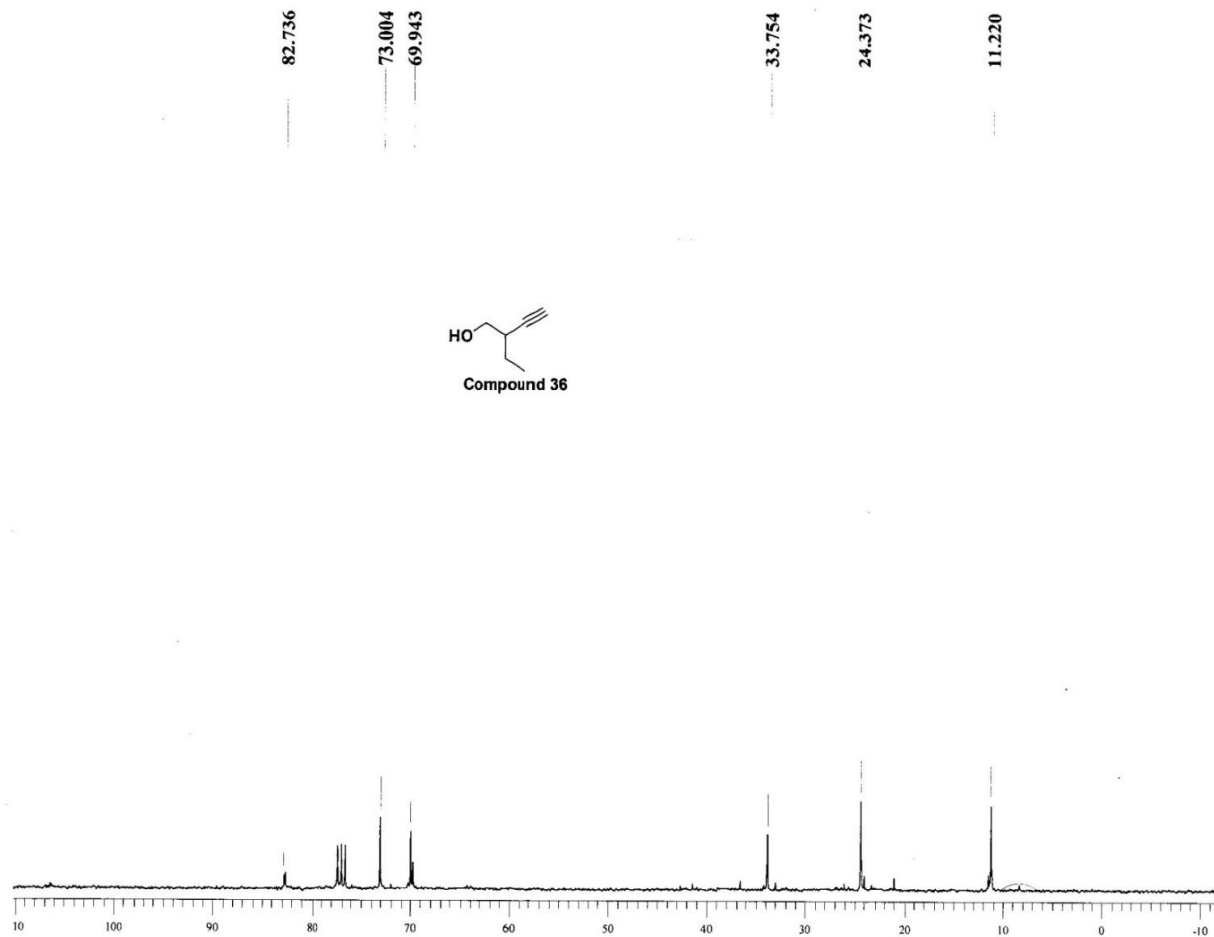

# <sup>1</sup>H NMR spectrum of Compound 31

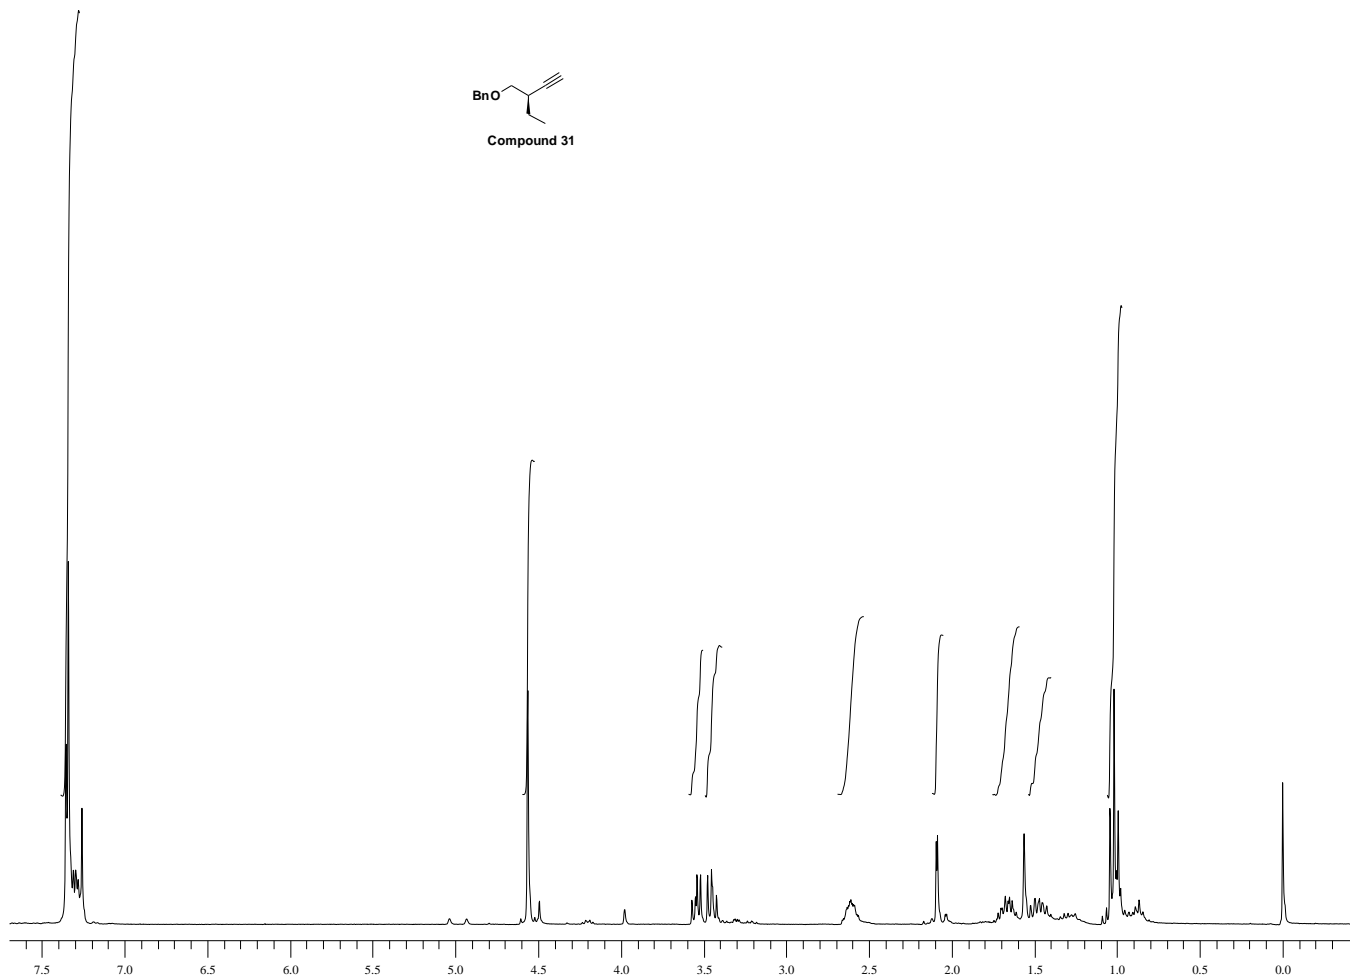

# <sup>13</sup>C NMR spectrum of Compound 31

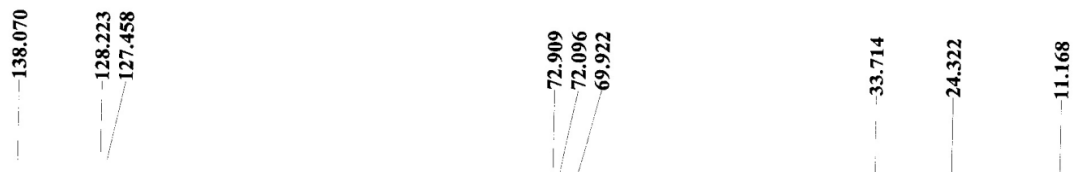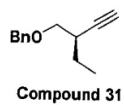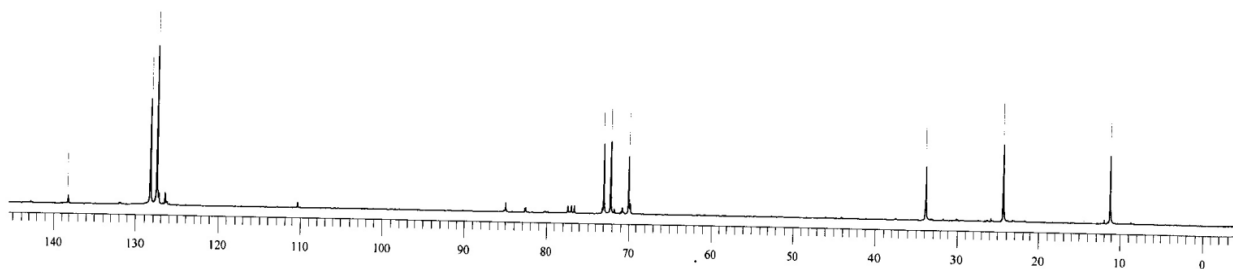

# <sup>1</sup>H NMR spectrum of Compound 37

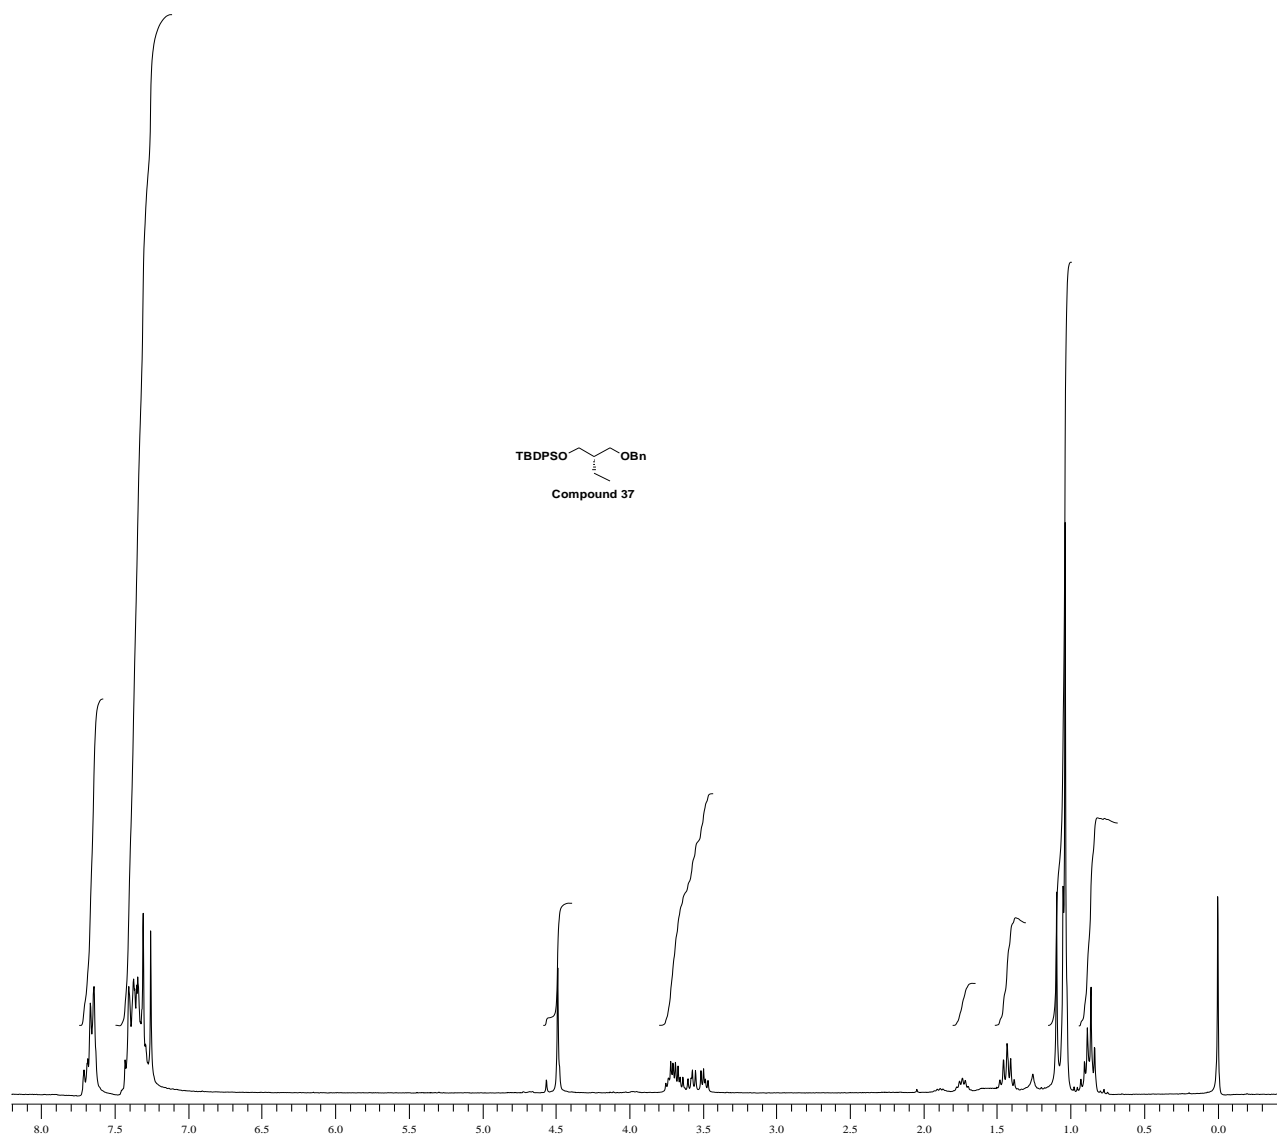

### $^{13}\text{C}$ NMR spectrum of Compound 37

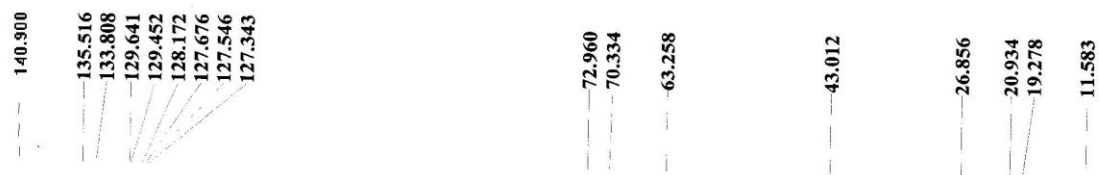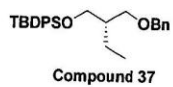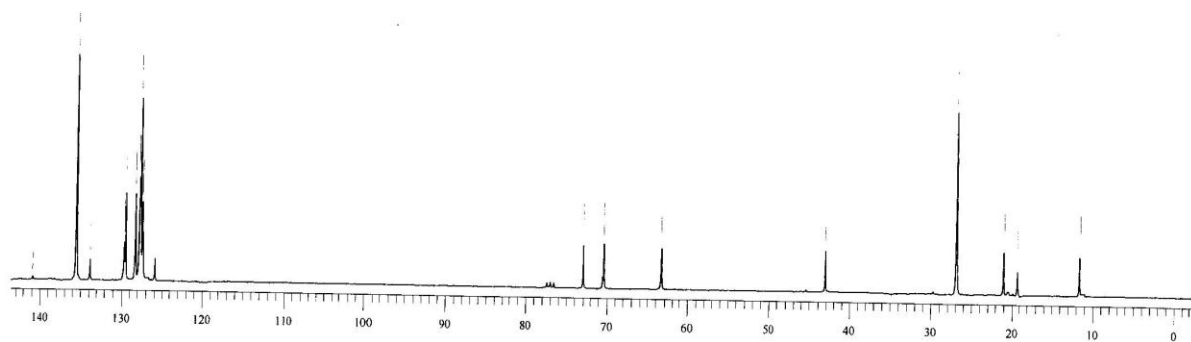



# <sup>1</sup>H NMR spectrum of Compound 38

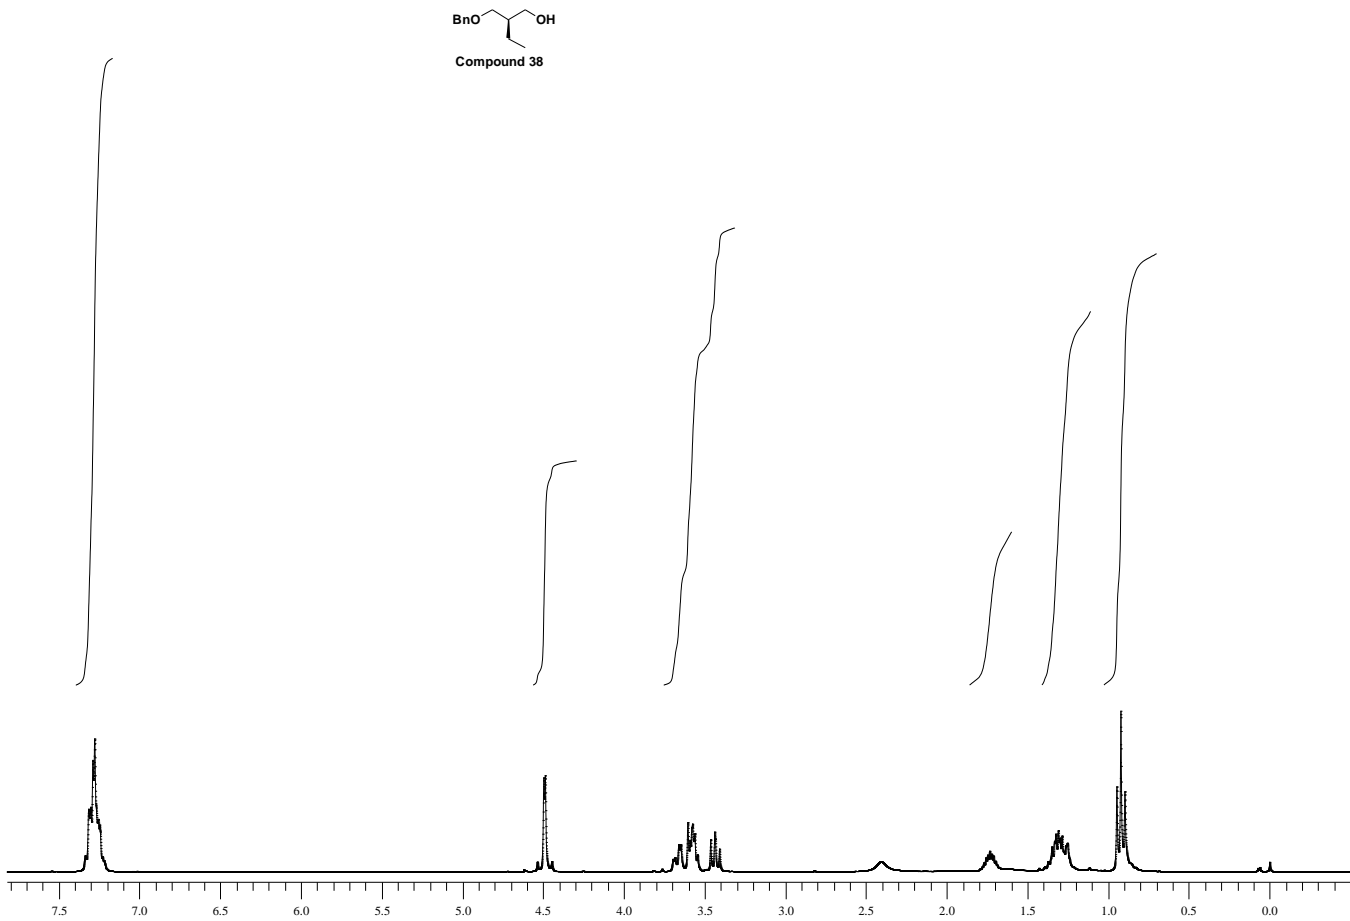

### $^{13}\text{C}$ NMR spectrum of Compound 38

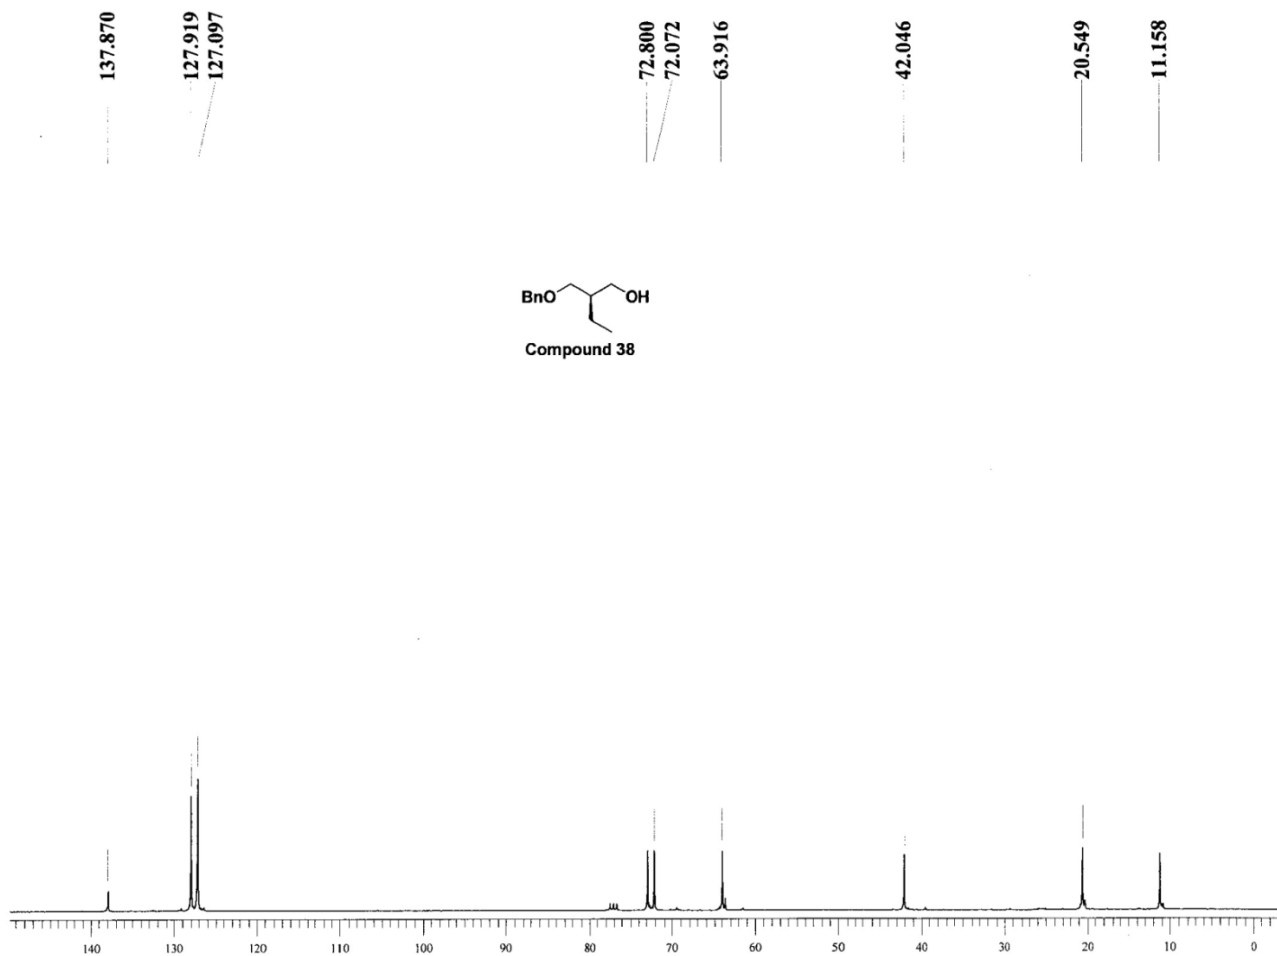

# <sup>1</sup>H NMR spectrum of aldehyde of Compound 38

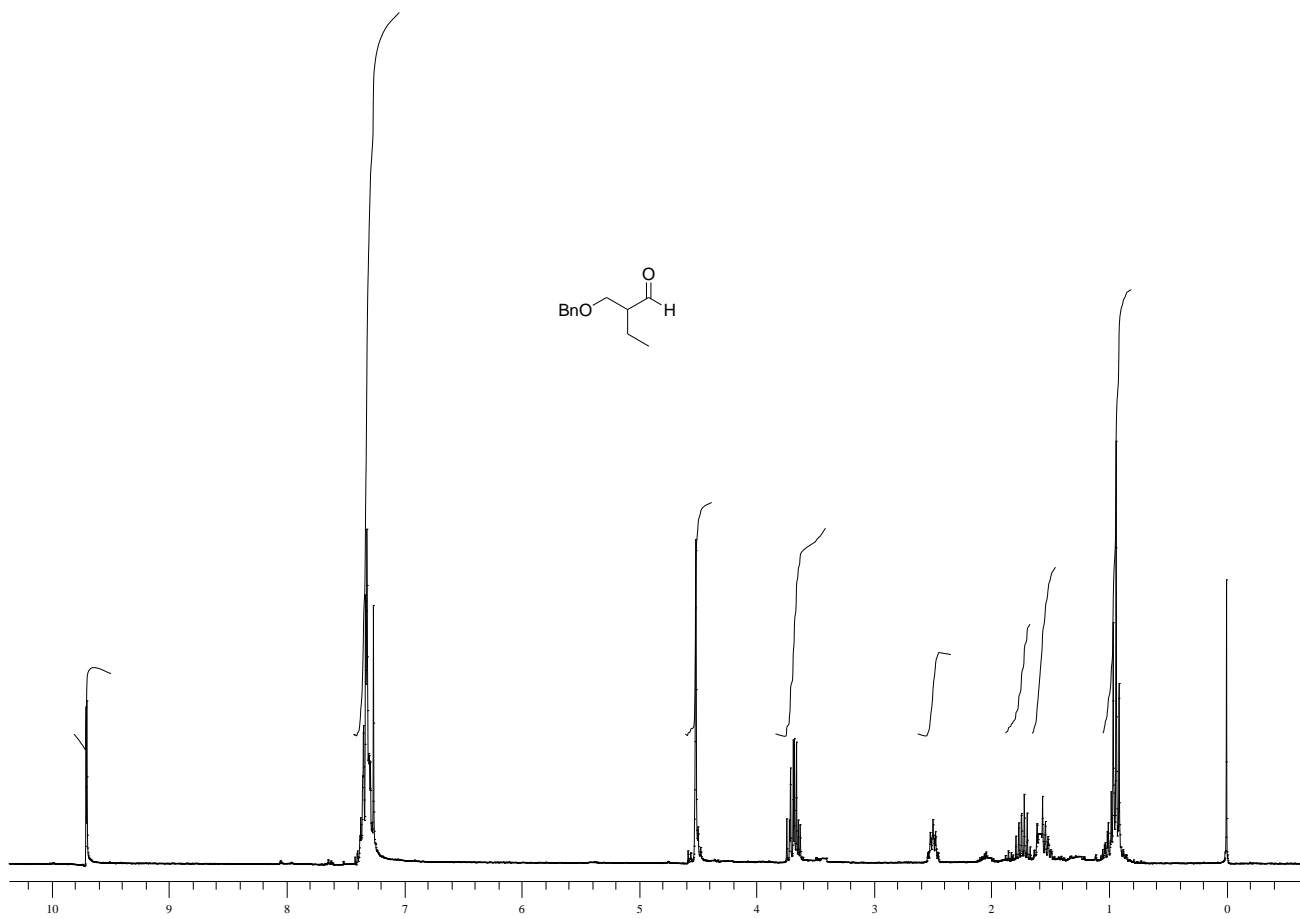

### <sup>13</sup>C NMR spectrum of aldehyde of Compound 38

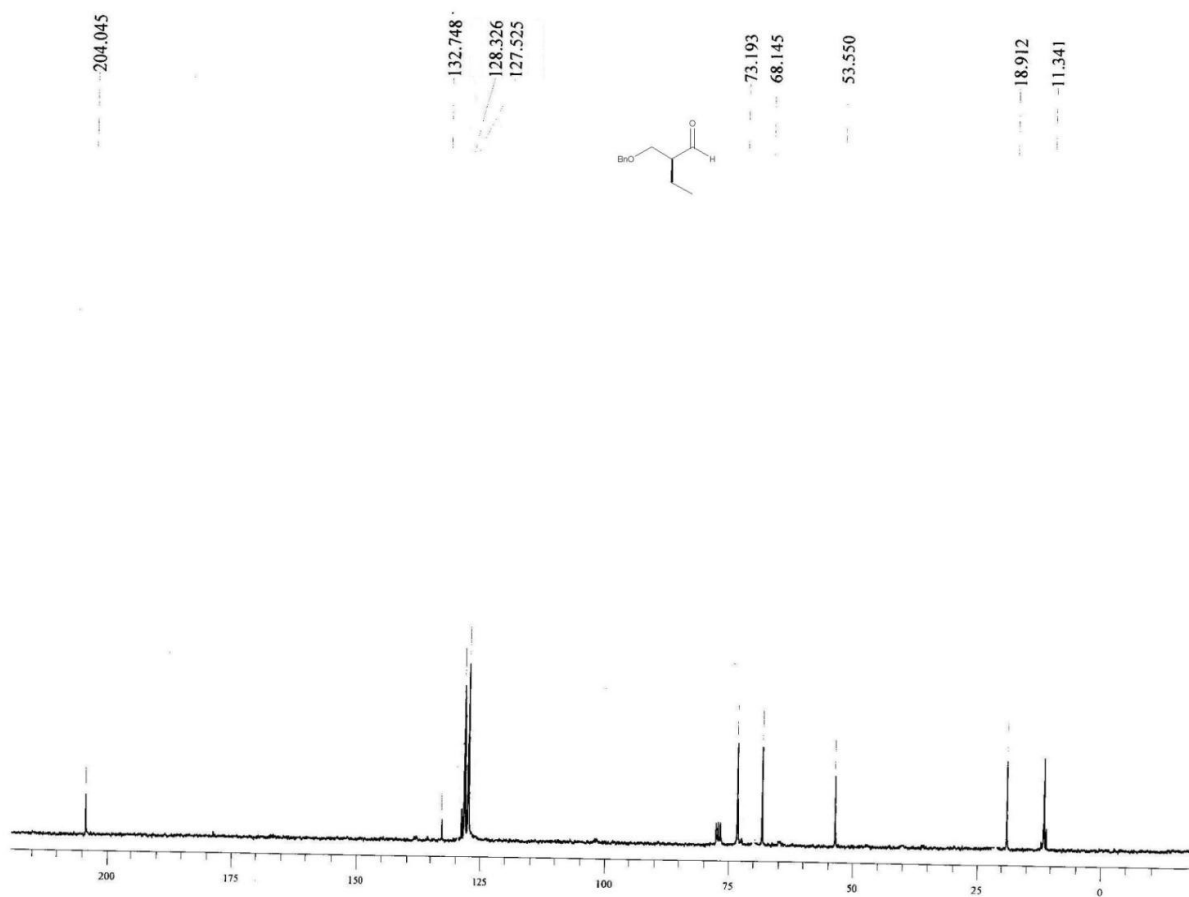

# <sup>1</sup>H NMR spectrum of Compound 39

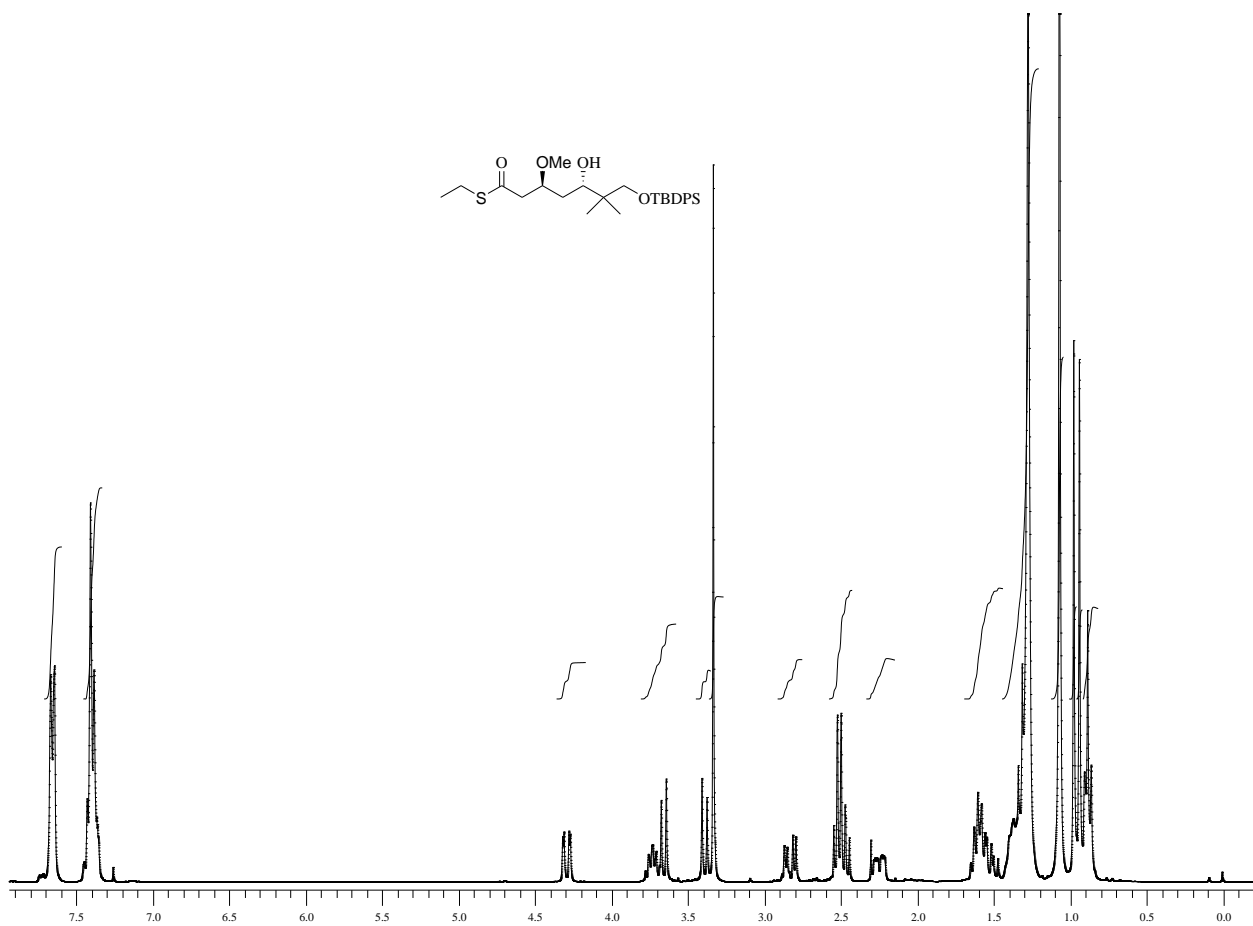

## <sup>13</sup>C NMR spectrum of Compound 39

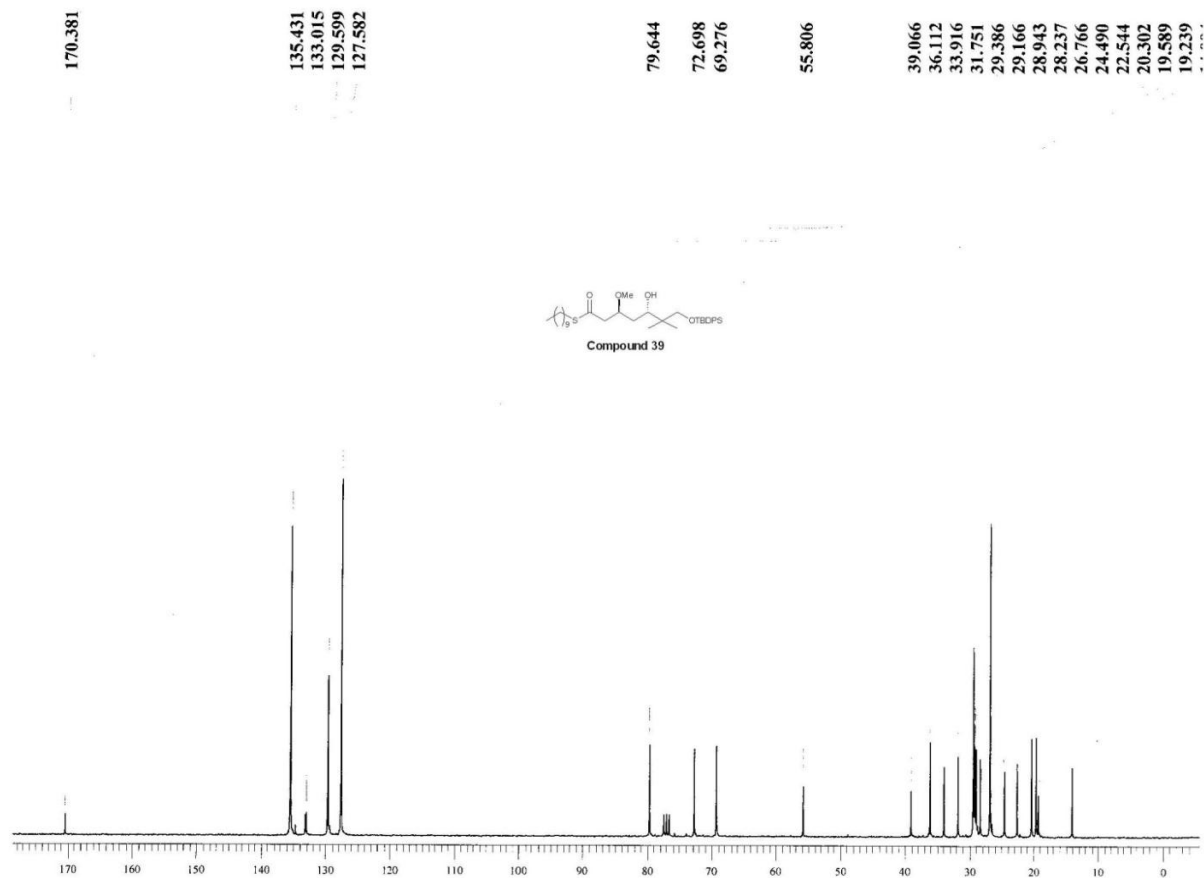

# <sup>1</sup>H NMR spectrum of Compound 40

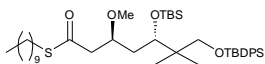

Compound 40

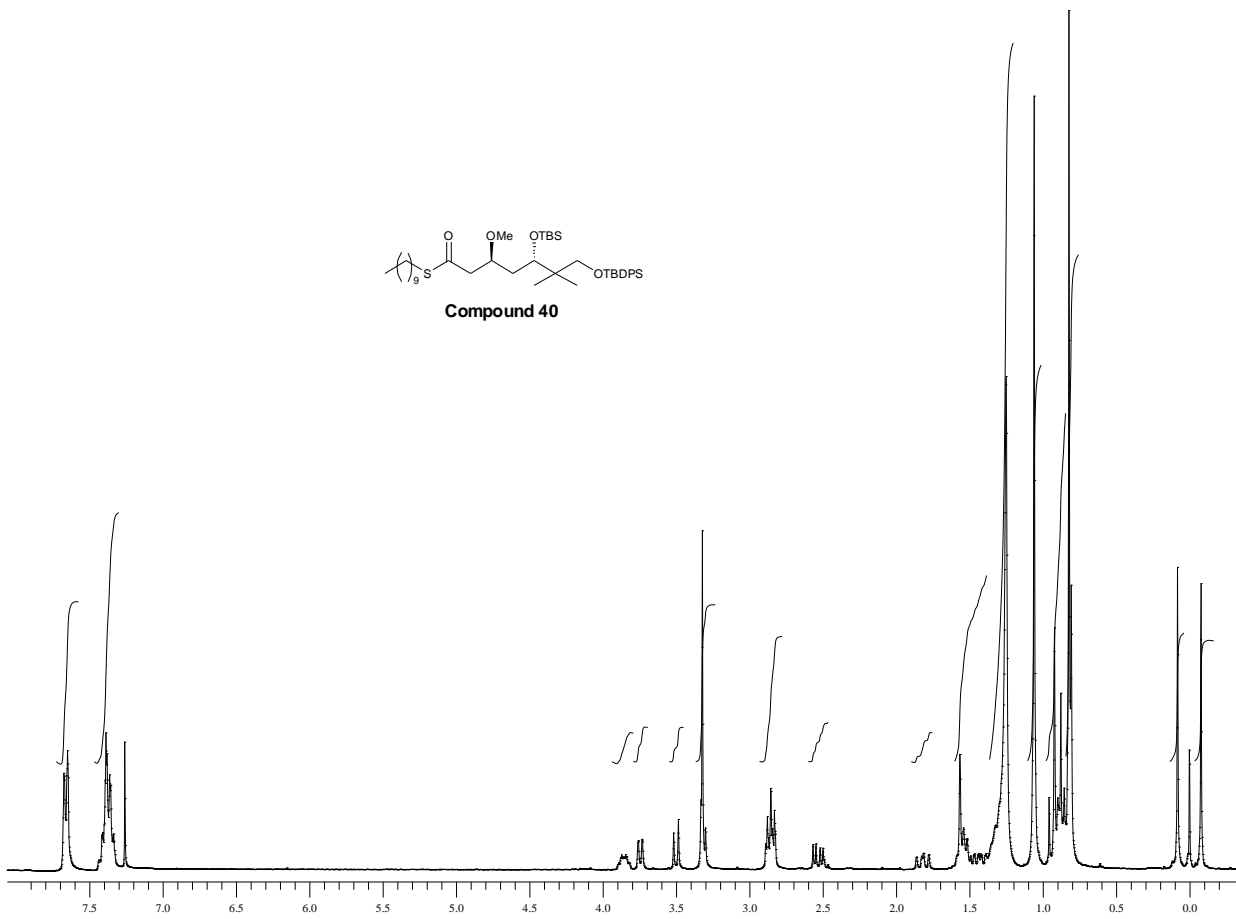

## $^{13}\text{C}$ NMR spectrum of Compound 40

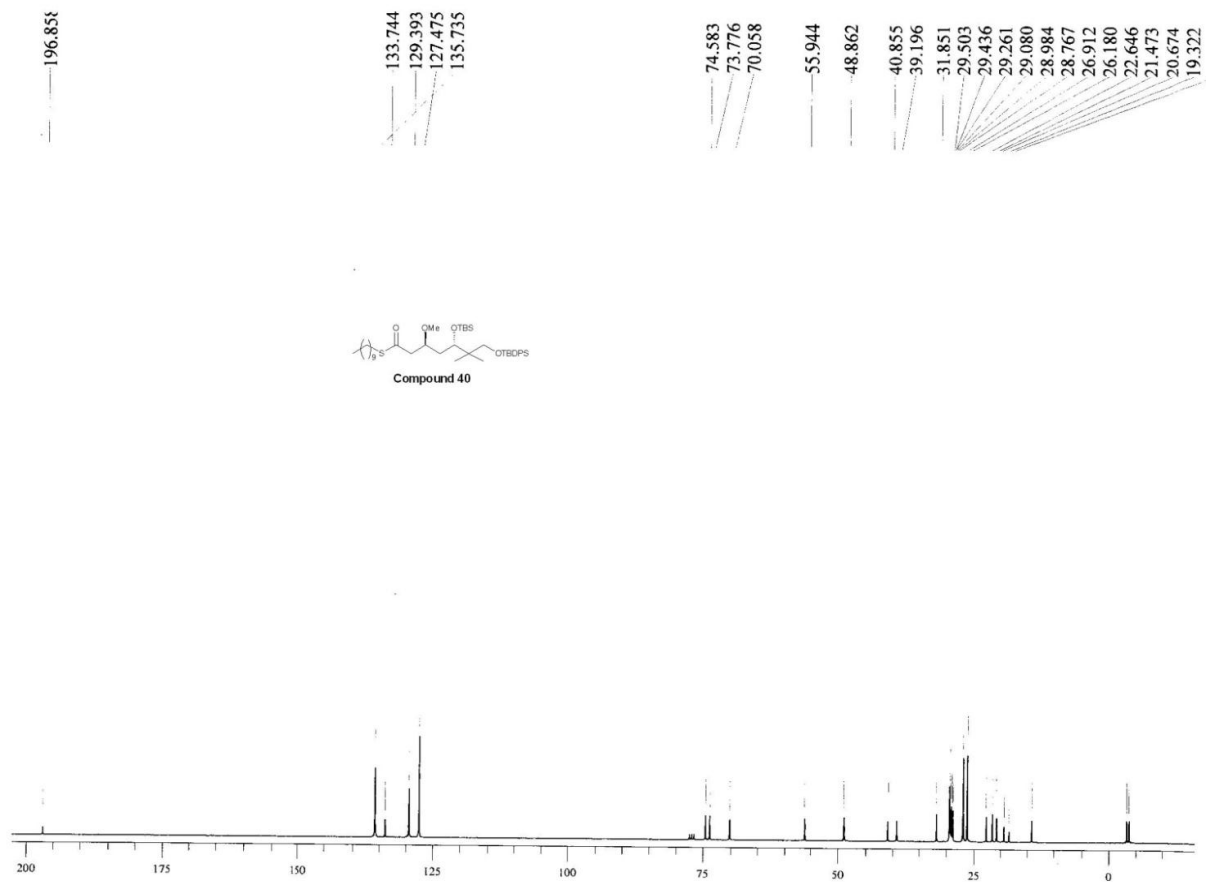



## <sup>1</sup>H NMR spectrum of Compound 32

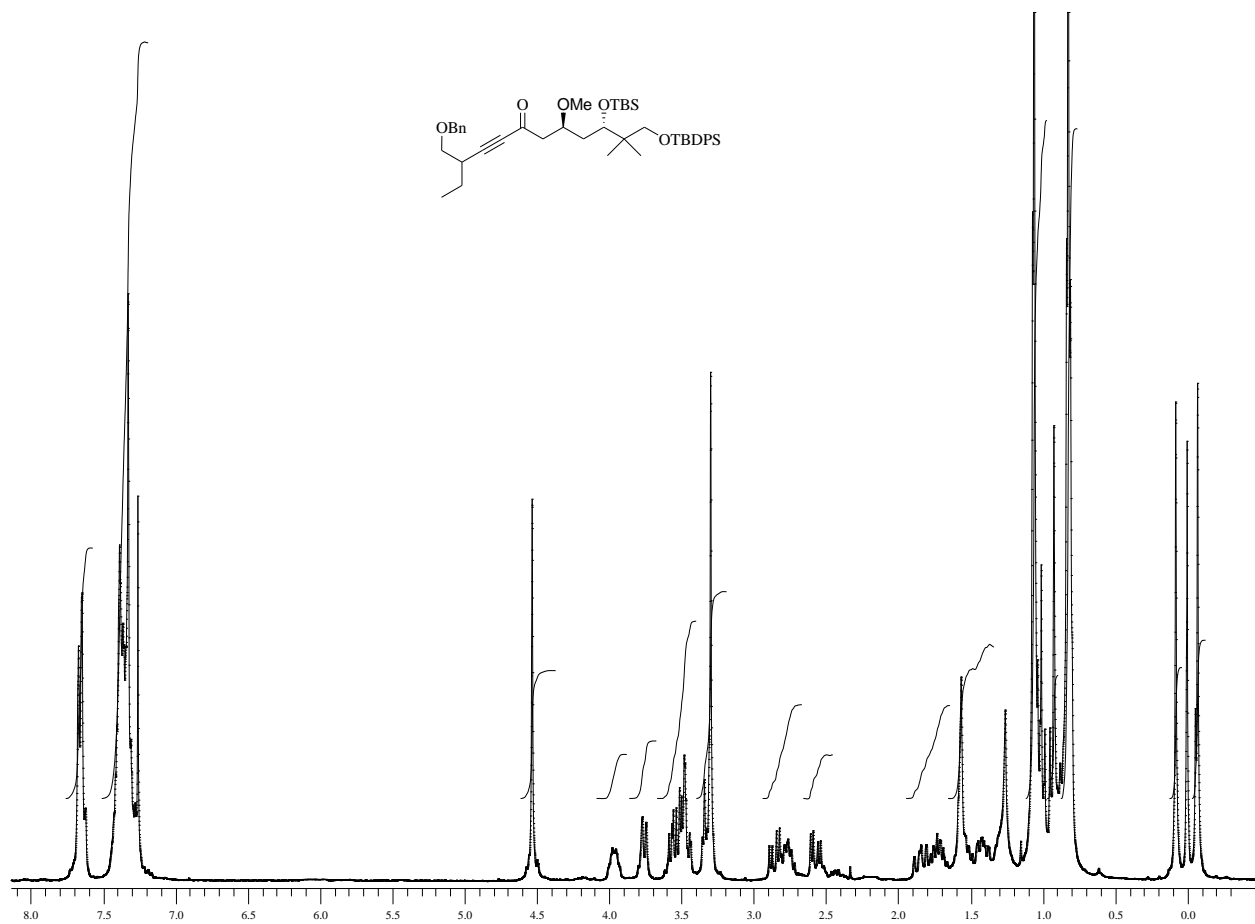

# <sup>13</sup>C NMR spectrum of Compound 32

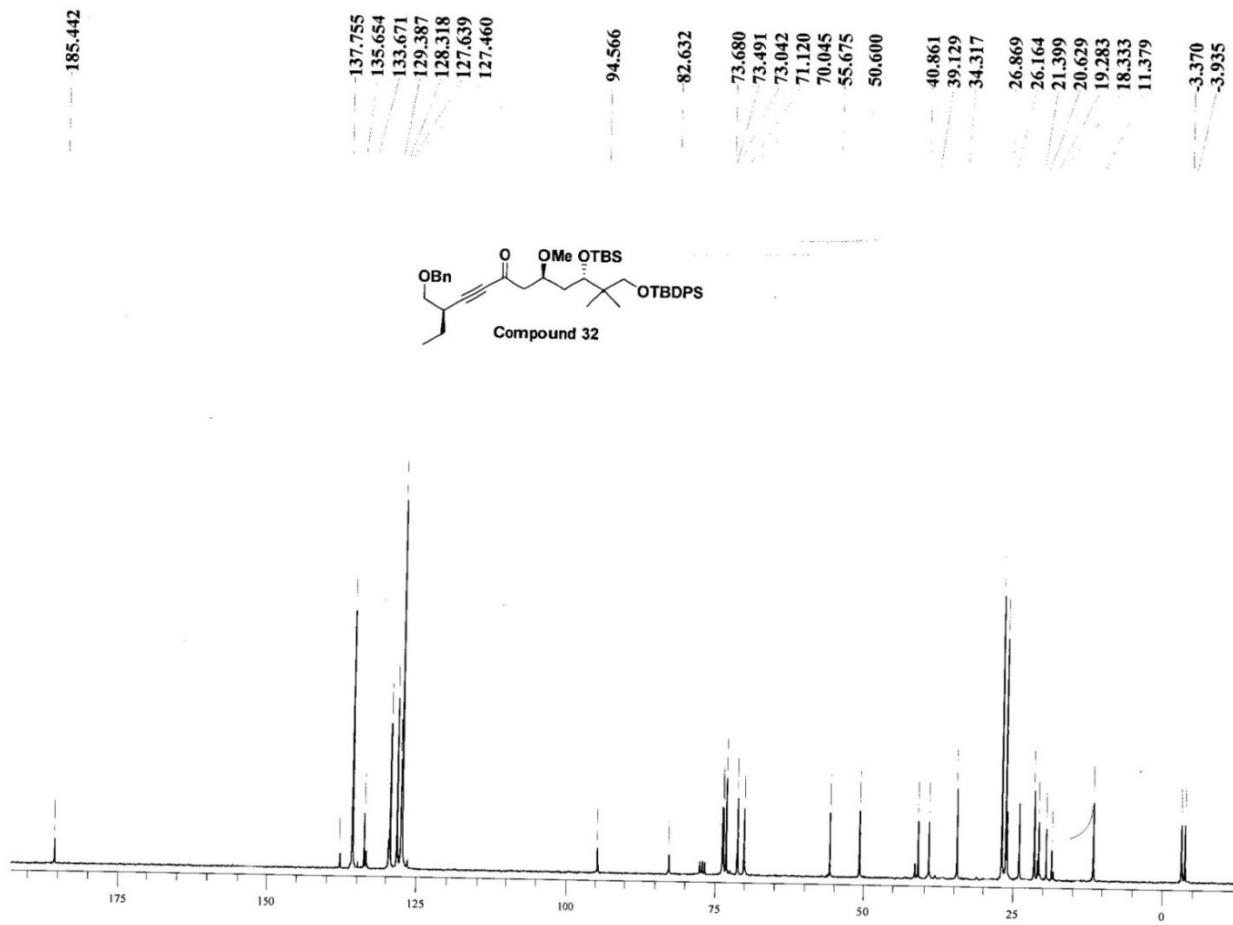

# <sup>1</sup>H NMR spectrum of Compound 41

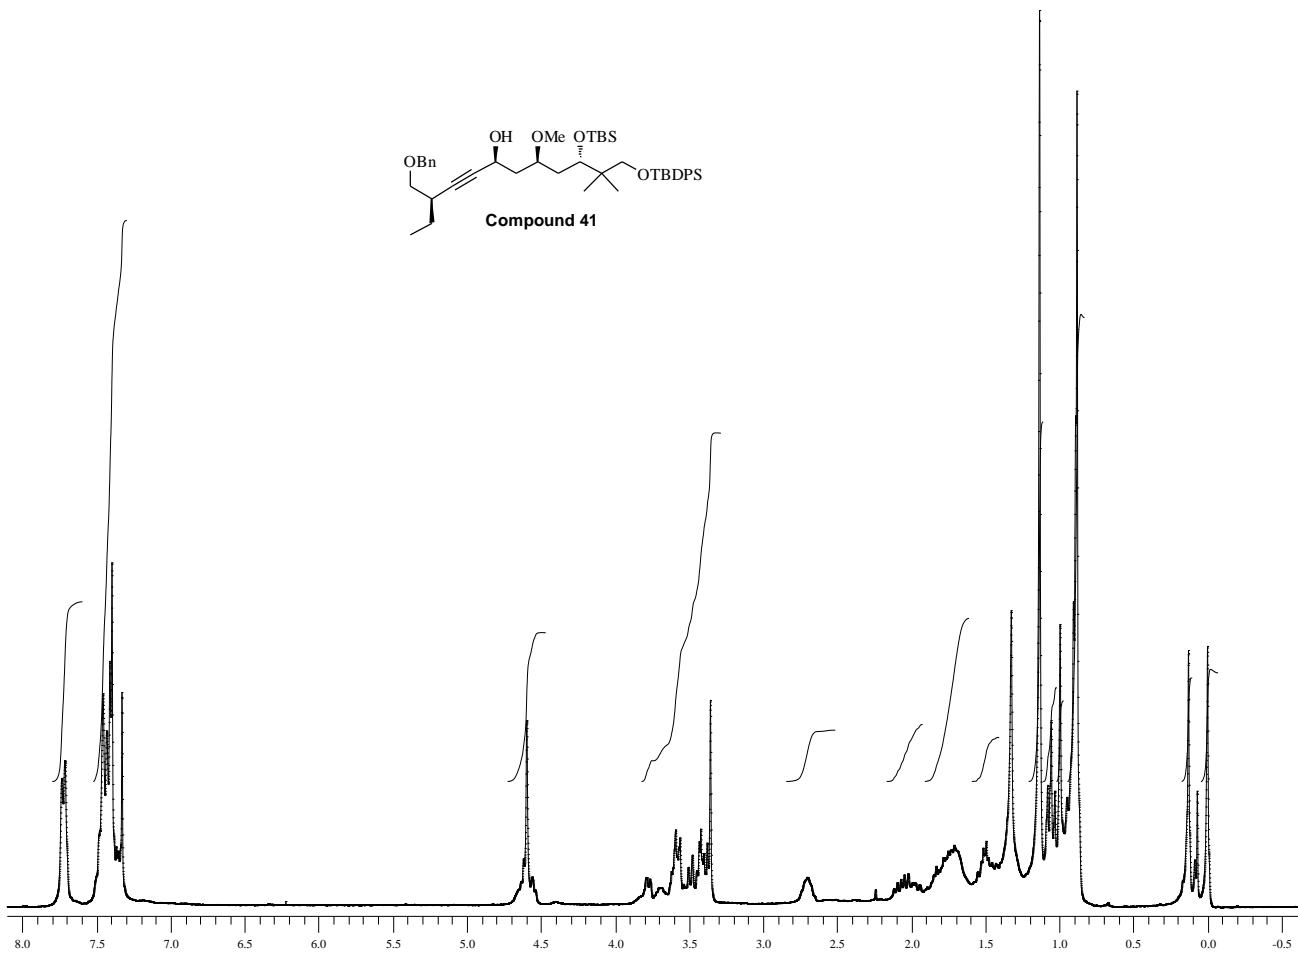

# <sup>13</sup>C NMR spectrum of Compound 41

138.172  
135.744  
133.787  
129.466  
128.338  
127.584  
127.518

85.659  
83.041  
75.936  
74.051  
72.983  
70.059  
60.866  
54.999

42.249  
41.081  
38.577  
33.915  
29.677  
26.948  
26.170  
21.597  
20.535  
19.358  
18.367  
11.417

3.207  
-4.015

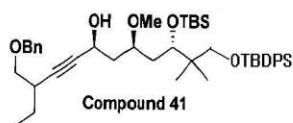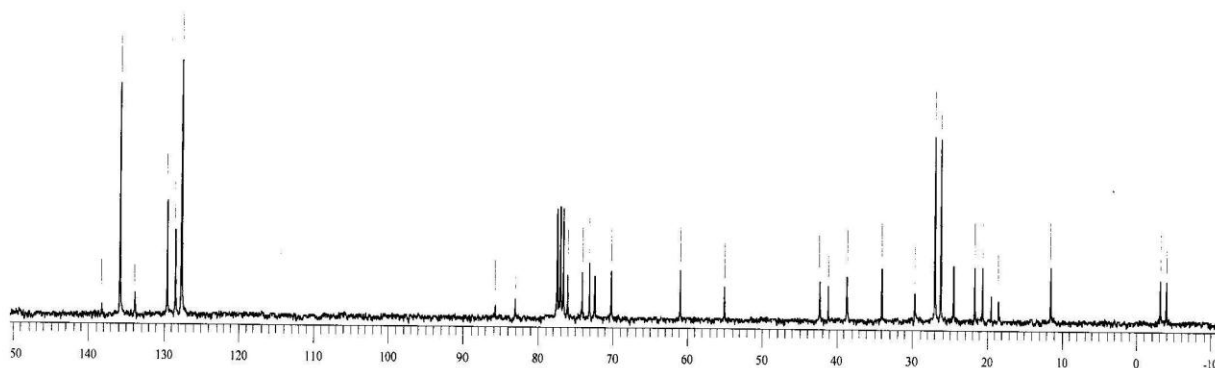

# $^1\text{H}$ NMR spectrum of mixture of Compound 42 and 43

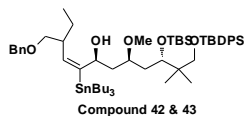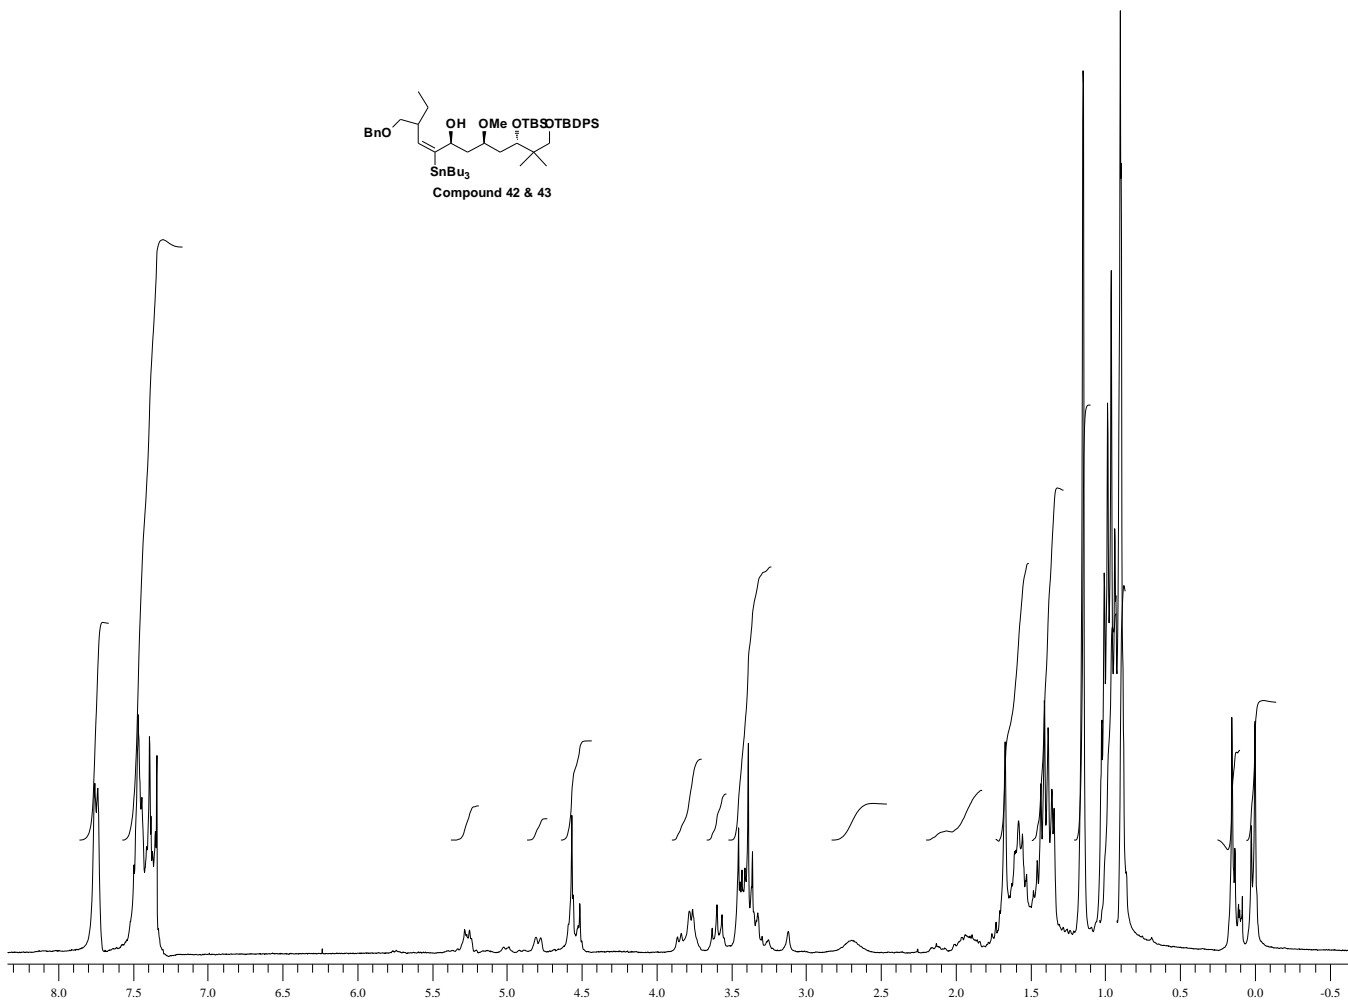

# <sup>1</sup>H NMR spectrum of Compound 44

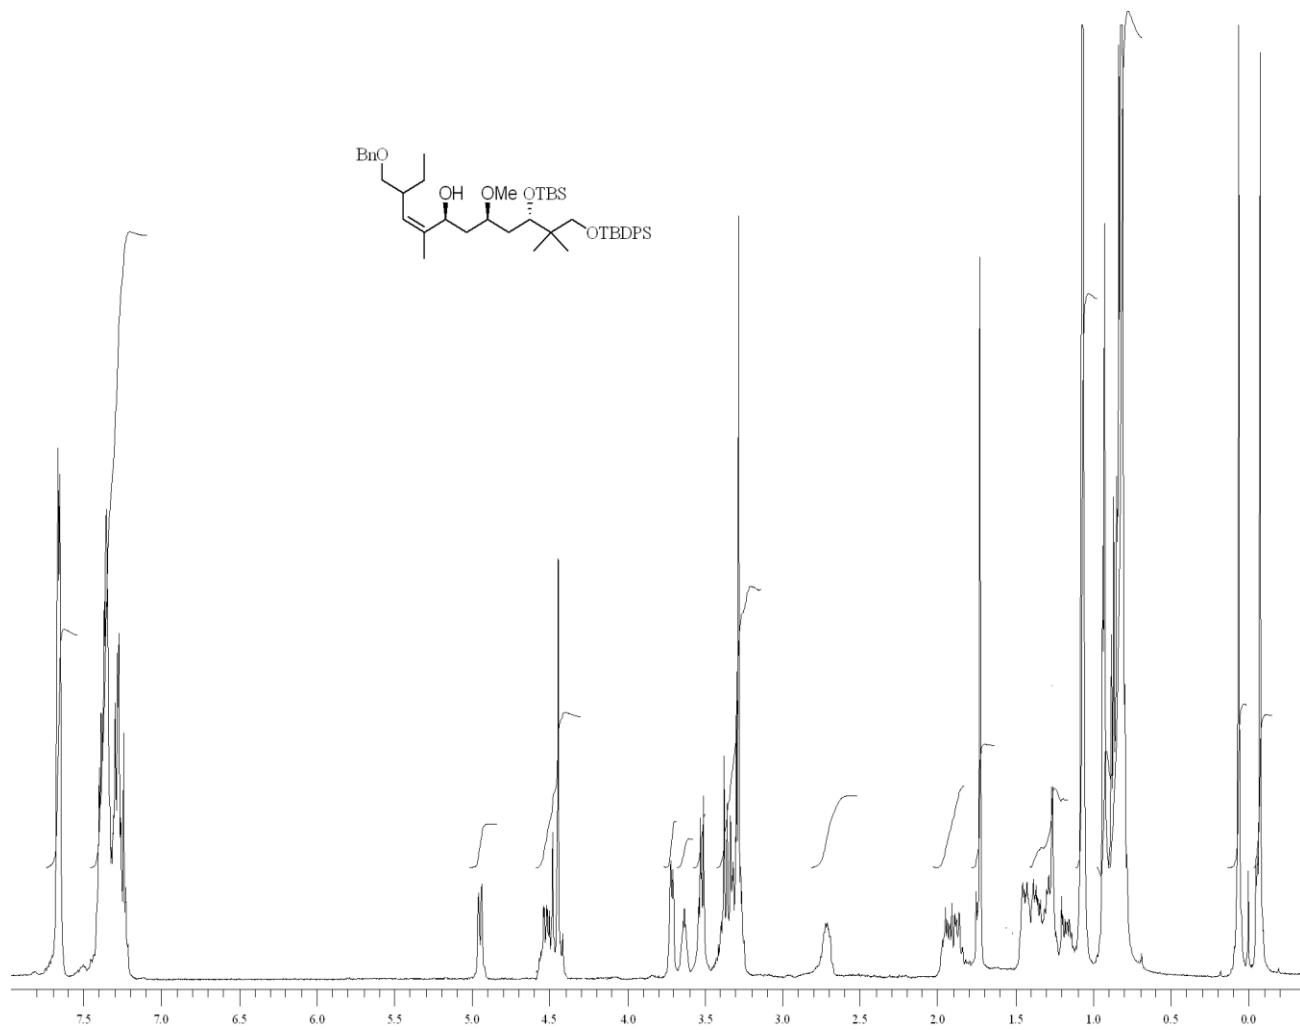

## NOE for Compound 44

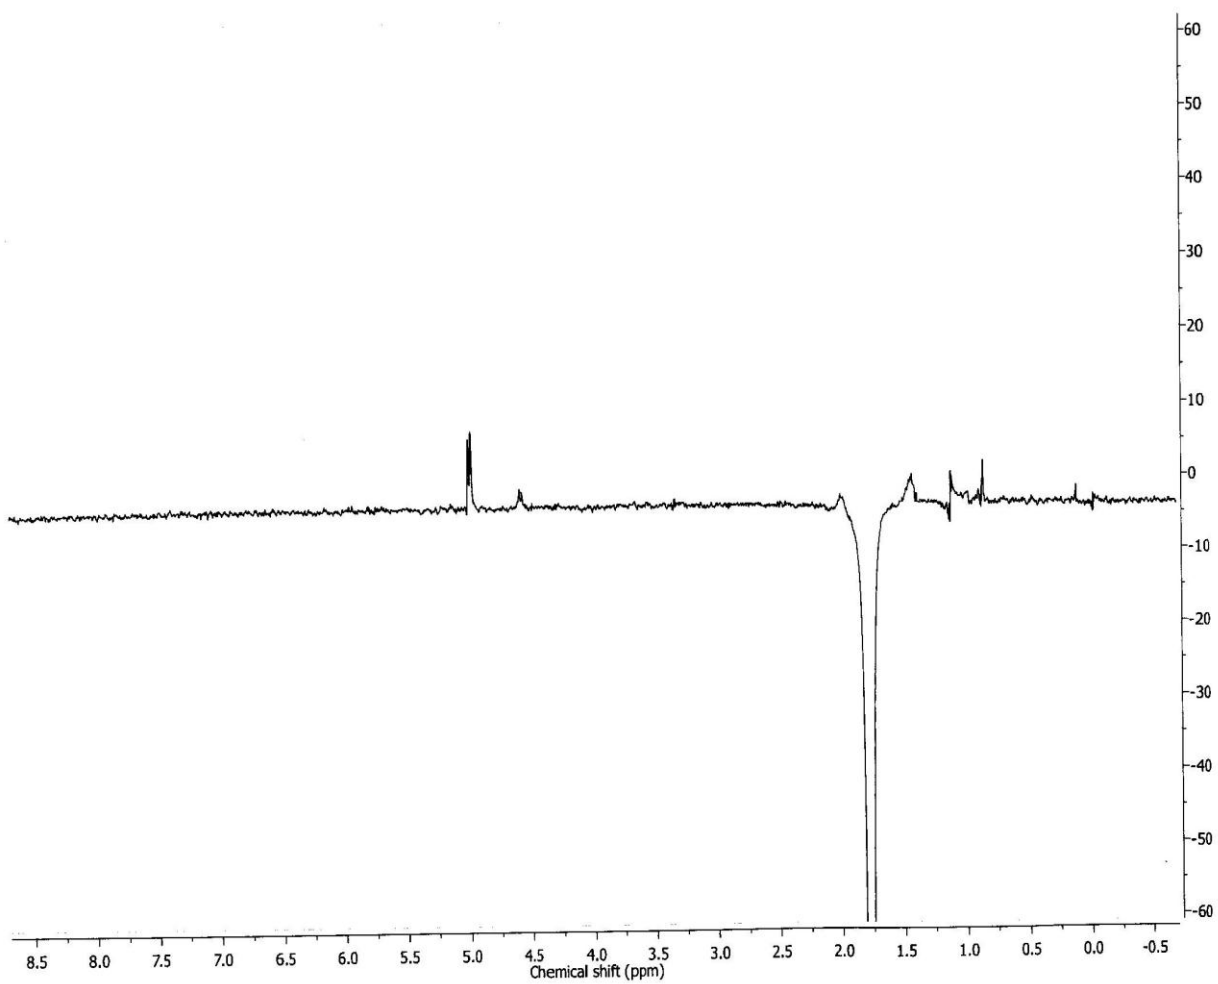

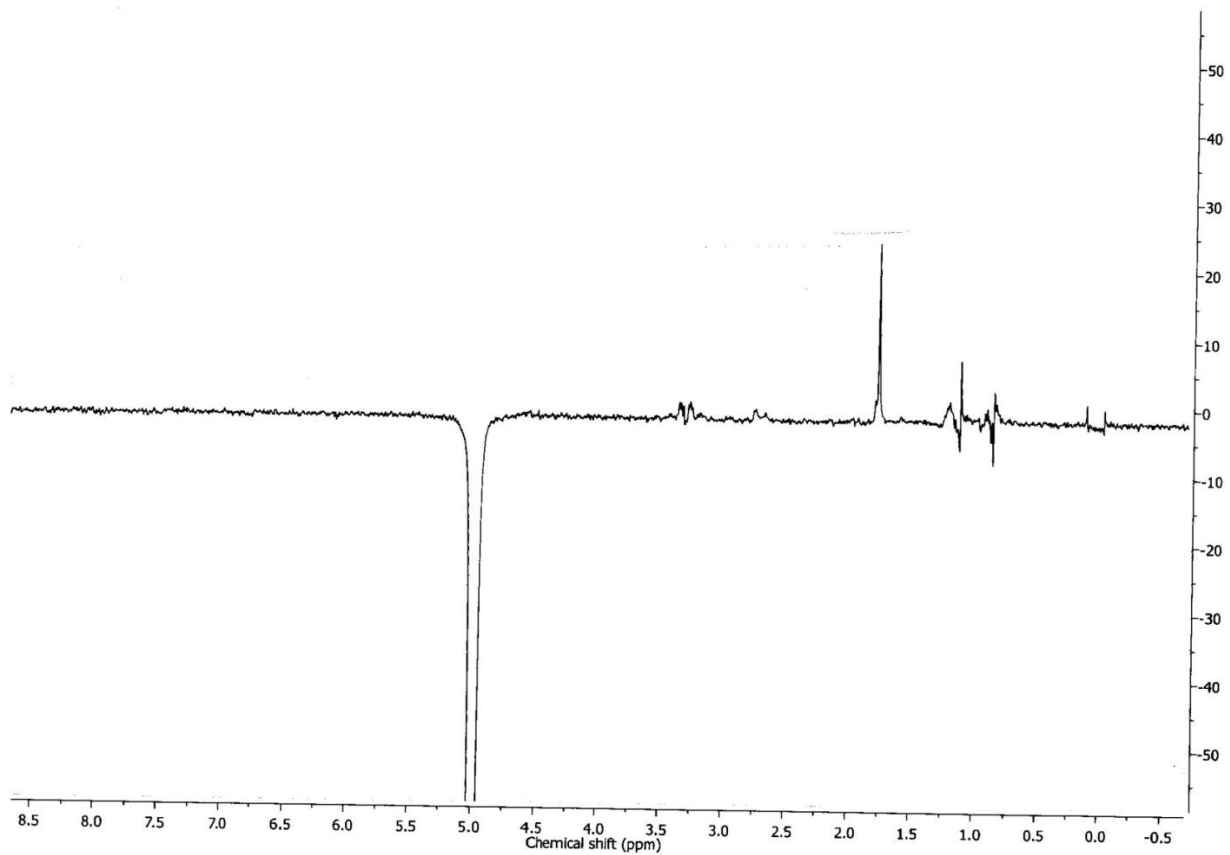



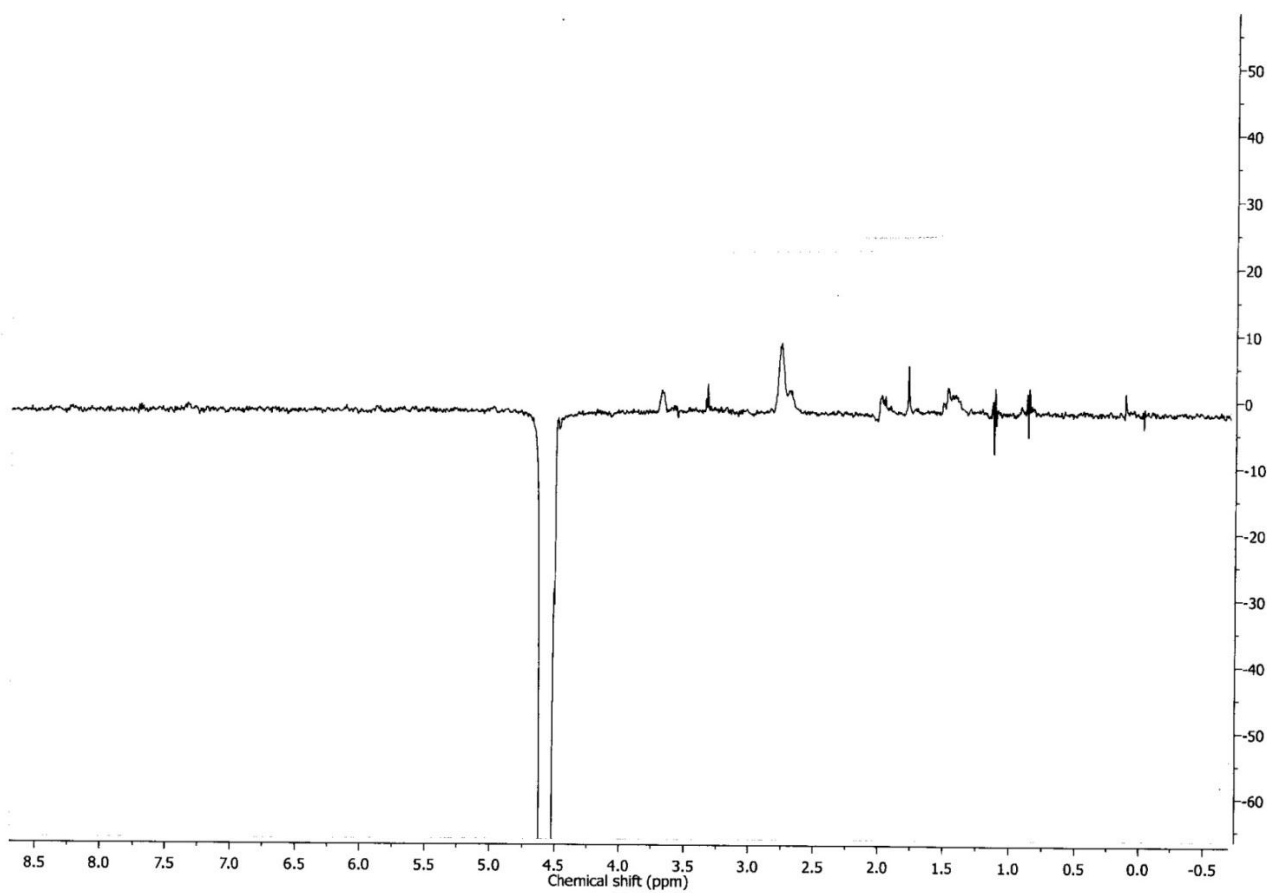

# <sup>13</sup>C NMR spectrum of Compound 44

139.056  
138.449  
135.742  
133.844  
129.439  
128.737  
128.238  
127.496  
127.394

76.258  
74.215  
73.854  
72.966  
70.198  
69.174

54.195

41.081  
39.471  
39.248  
38.505

26.962  
26.177  
25.100  
21.649  
20.428  
19.361  
19.179  
18.378  
11.696

-3.315  
-3.959

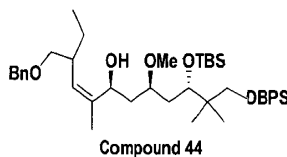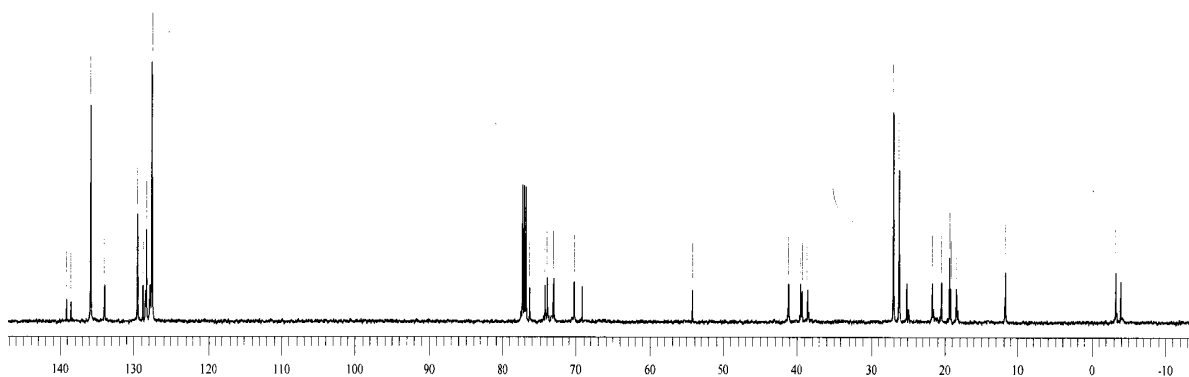

# <sup>1</sup>H NMR spectrum of Compound 45

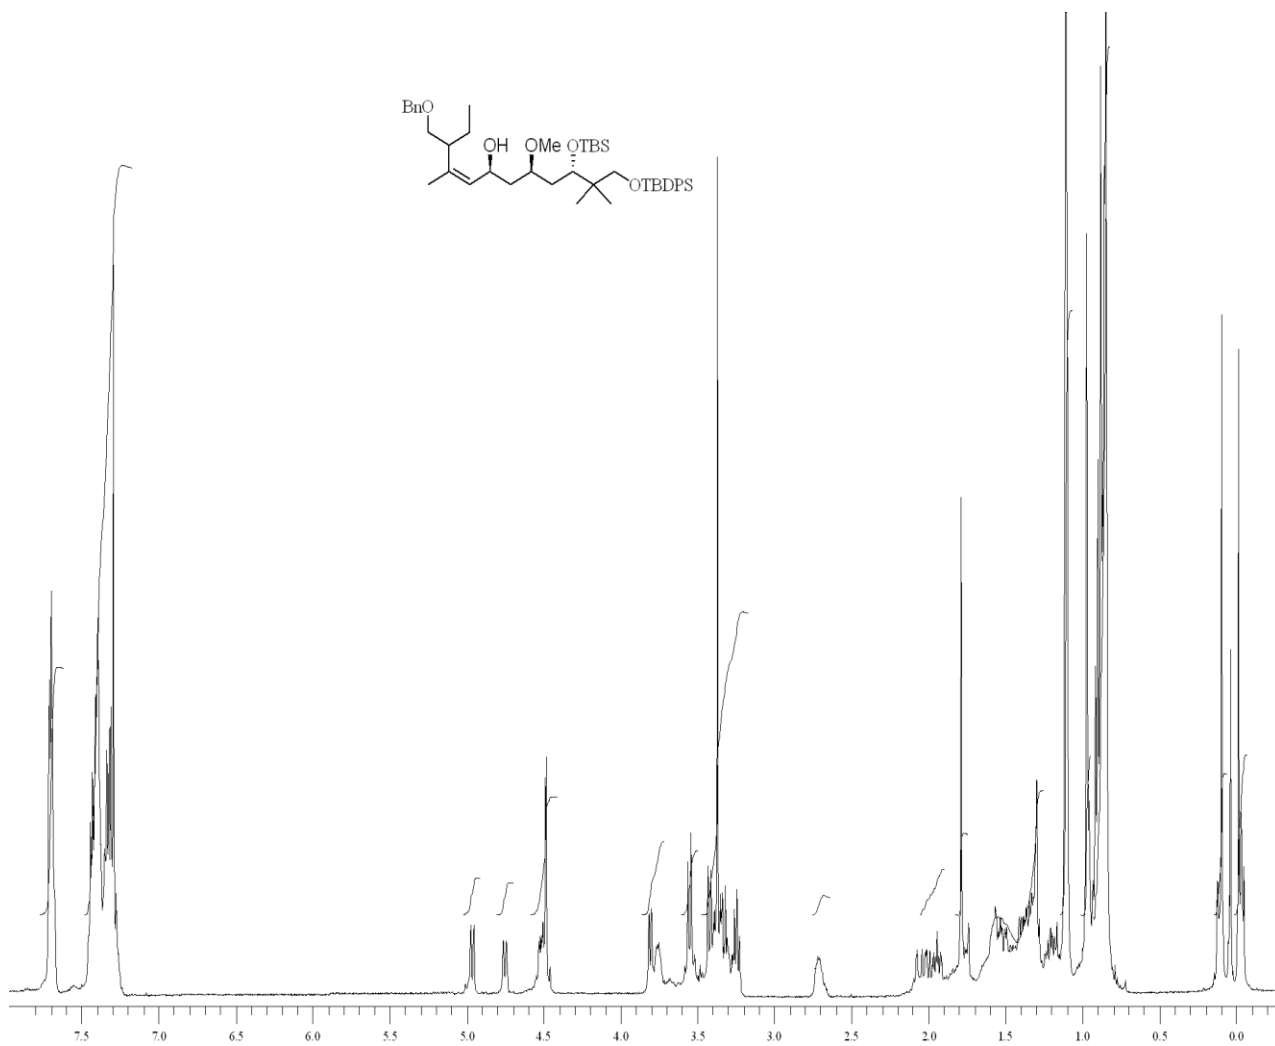

## NOE for Compound 45

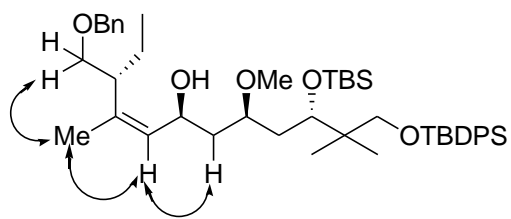

Compound 45

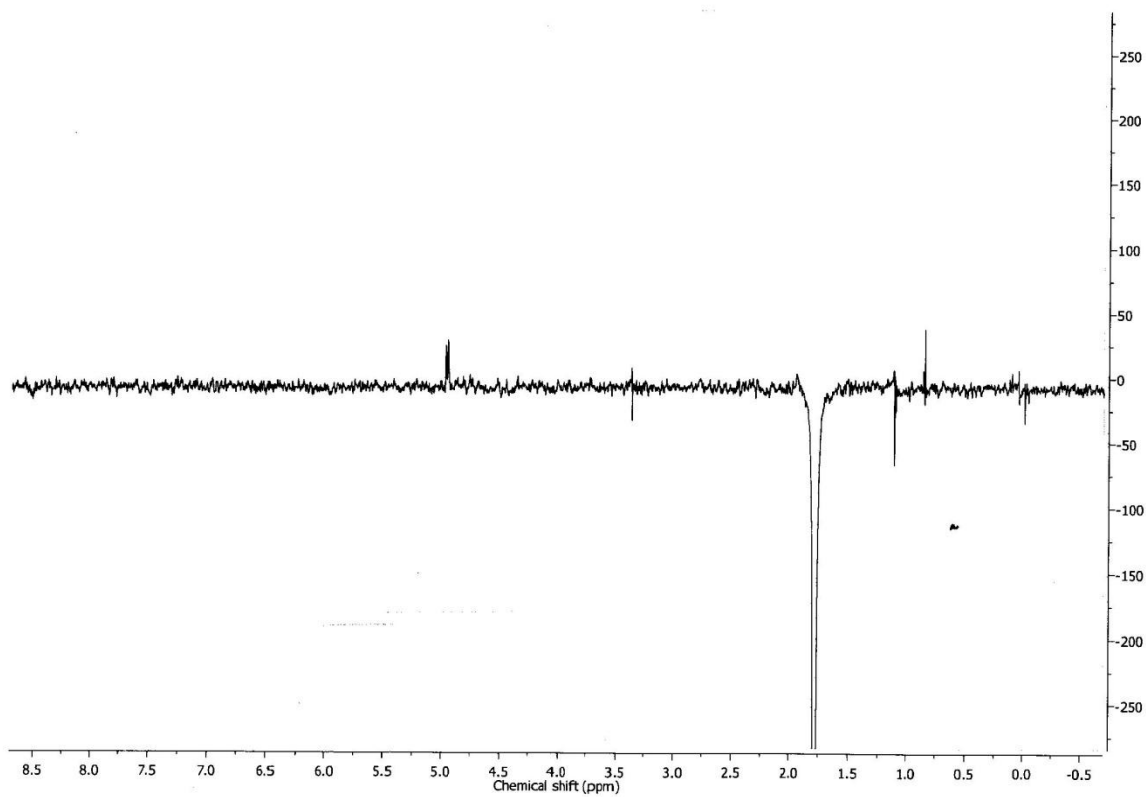

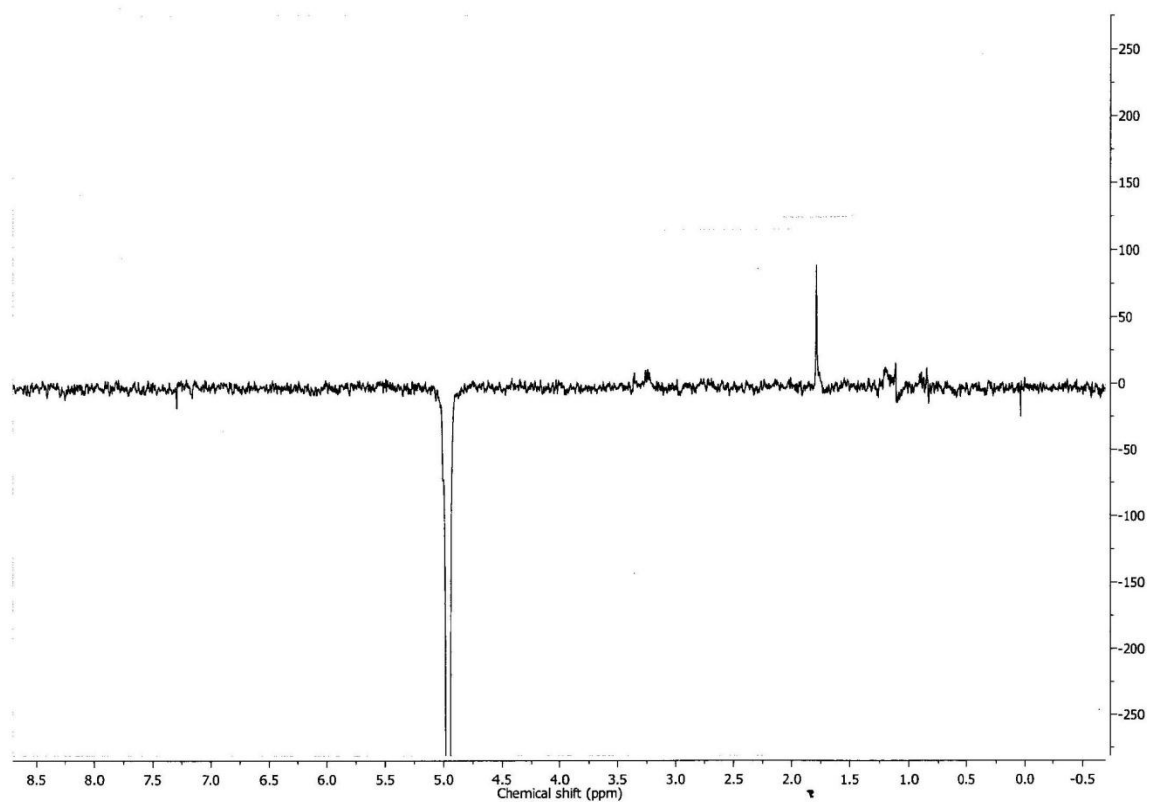

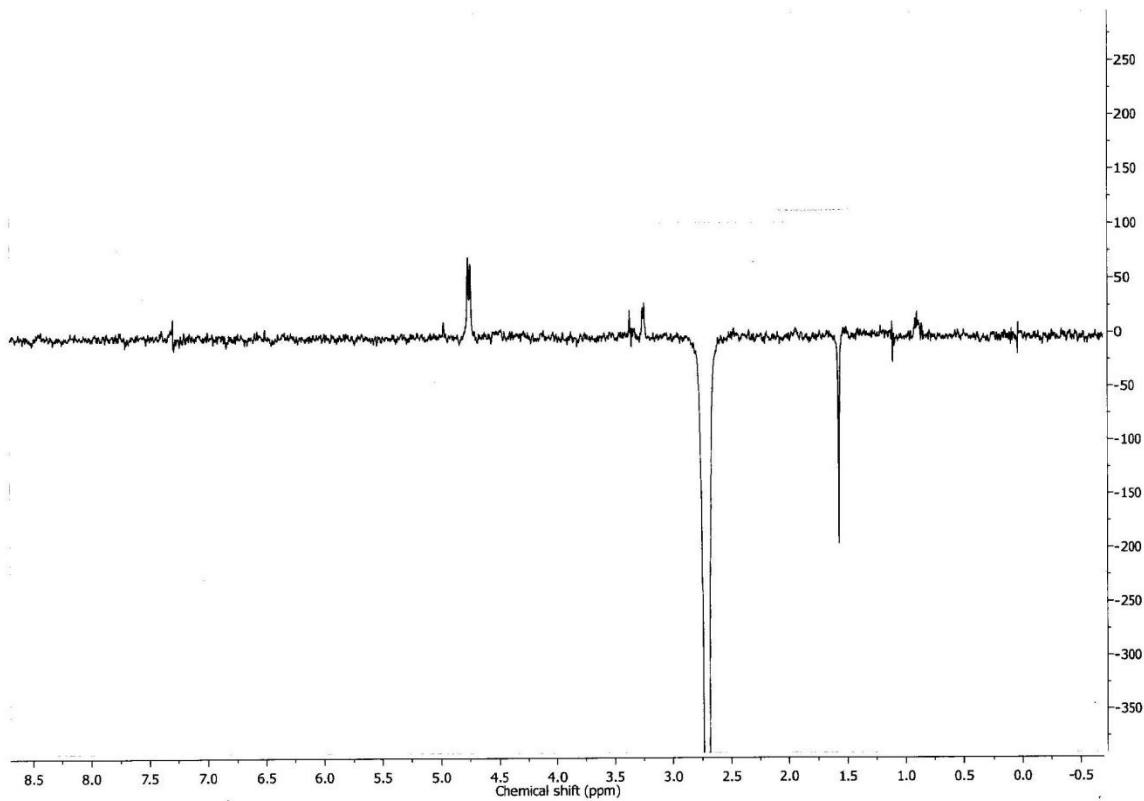

## $^{13}\text{C}$ NMR spectrum of Compound 45

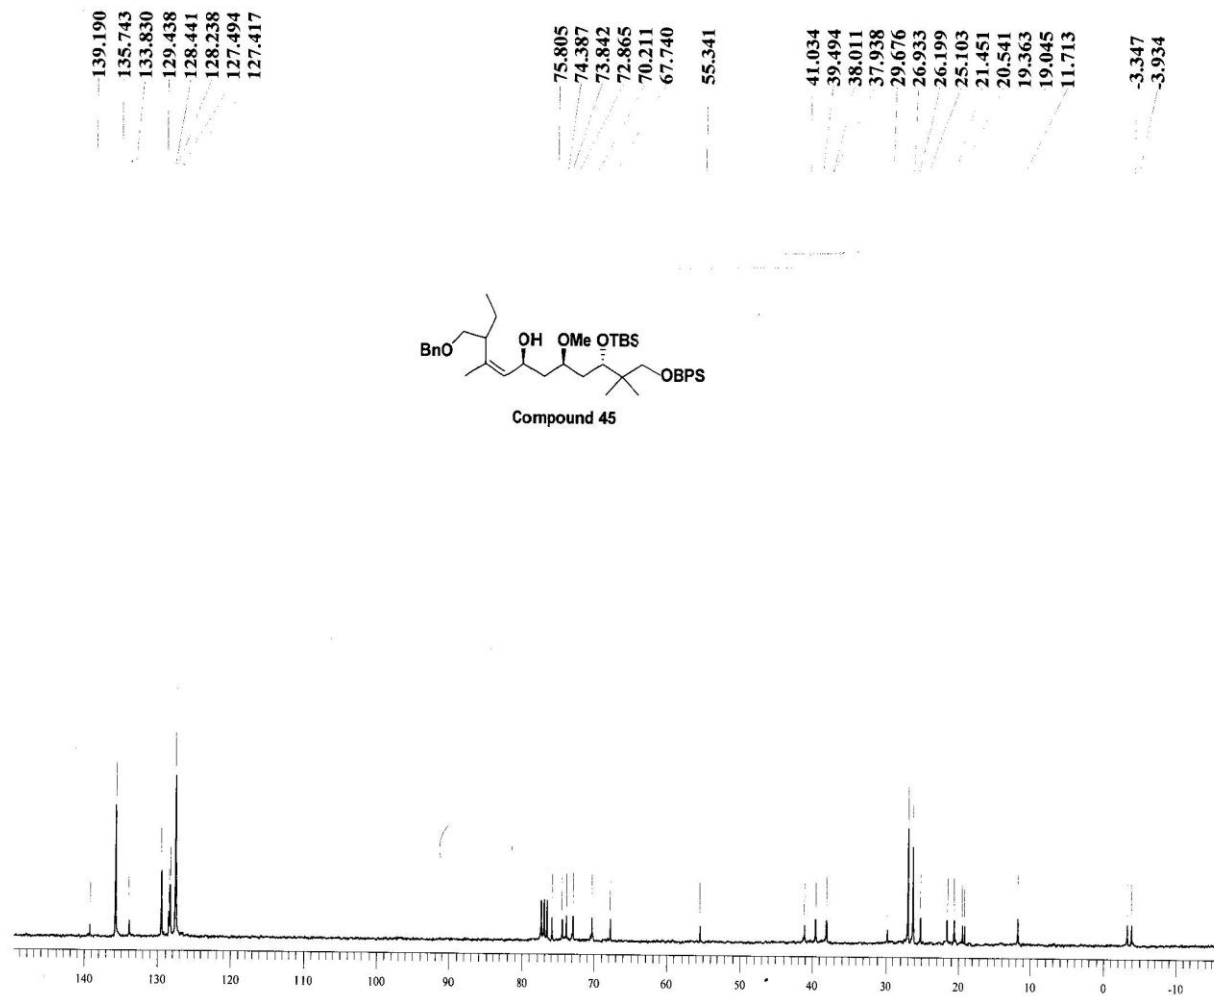

Supplement: c3ob27508f.pdf [file c3ob27508f.pdf]
